# Supplementary material for: Antigen-Specific Culture of Memory-like CD8 T Cells for Adoptive Immunotherapy
Source: Oxford University Press journal article supplement (doi:10.1158/2326-6066.cir-14-0038), 2014-05-23
Supplement: 23266066cir140038-sup-tab_1.xlsx [file 23266066cir140038-sup-tab_1.xlsx]

## Sheet: 1v3_IPA_upstream_regulators
Upstream Regulator	Fold Change	Molecule Type	Predicted Activation State	Activation z-score	p-value of overlap	Target molecules in dataset	Mechanistic Network
HIF1A		transcription regulator	Activated	2.515	0.00251	C9orf9,CCR7,CD70,CDH1,ENG,ENO2,EPAS1,GATA1,GBE1,ITGA1,NRN1,P4HA2,PLAUR,SDC4,STC2,TGFB3,VEGFA	AR,BRCA1,CTNNB1,ESR1,GLI1,HIF1A,JUN,SMAD3,SMAD4,STAT3,TCF,TP53,VHL,Vegf
STAT4		transcription regulator	Activated	2.475	8.82e-09	ARMCX1,C3,CXCL10,ENO2,ETV5,FCER1G,FSCN1,GBE1,GRTP1,HLA-DQB1,IFNG,ITGA7,MBOAT2,Ms4a4b (includes others),P4HA2,RORA,SERPINB1,STC2,TCF7,TGFB3,TPD52,TWIST1,VEGFA	IL4,JUN,NFKB1,NFkB (complex),RELA,STAT1,STAT3,STAT4,STAT6,TP53
SQSTM1		transcription regulator	Activated	2.236	0.00268	CD70,IL15,NFKBIA,PLK2,TSC22D1	NFKB1,NFKBIA,NFkB (complex),RELA,SQSTM1,STAT3,TP53
FOXO1		transcription regulator	Activated	2.216	0.000179	AFF3,ATP6V0A1,BACH2,CCL4,CCR7,CD70,CDKN2B,CTSE,CXCL10,FAS,FOXP3,GZMA,IFNG,KLF4,PPARG,PRF1,SELL,TCF7,THBS1	AKT1,Akt,Ap1,BRCA1,ESR1,FOXO1,IL6,JUN,MAPK14,NFKB1,NFkB (complex),PPARA,PPARG,RELA,RXRA,SP1,STAT1,STAT3
SIRT1		transcription regulator	Activated	2.177	0.075	CDH1,CDKN2B,ESR1,IFNG,IGF1R,PC
RELA		transcription regulator	Activated	2.073	8.32e-07	ABCG2,AHRR,APP,CCL5,CCR7,CSF2,CSN2,CXCL10,CYBB,DIO2,EGR1,FAS,IFNG,IFNGR2,IGF1R,KIT,NFKBIA,NOD2,PLAU,PPARG,SDC4,Serpina3g (includes others),TGM2,TNFAIP2,TWIST1,VEGFA	Ap1,BCL10,IL6,NFKB1,NFKBIA,NFkB (complex),PPARG,REL,RELA,RELB,STAT1,STAT3,TNF,TP53
CIITA		transcription regulator		1.969	0.00162	CD74,HLA-A,HLA-DQA1,HLA-DQB1,HLA-DRB1
MYB		transcription regulator		1.964	0.059	CDH1,CDKN2B,IGF1R,KIT,KLF4
FOXM1		transcription regulator		1.949	0.059	ANXA1,CDH1,ESR1,TWIST1,VEGFA
TP63		transcription regulator		1.842	0.00491	BMP7,CDKN2B,CSTA,FAS,ITGA4,ITGA7,PAK1,PERP,PLAU,S100A4,SH2B3,THBS1,TWIST1,VEGFA	AHR,JUN,NFKB1,NFKBIA,NFkB (complex),RELA,STAT3,TP53,TP63,TP73,WT1
BCL6		transcription regulator		1.809	0.000455	BACH2,CCR7,CXCL10,CXCR5,ENTPD1,FAS,FOXP3,IFNG,MAF,PRDM1,SDC1	Ap1,BCL6,IL10,IL4,IRF8,JUN,NFKB1,NFkB (complex),P38 MAPK,RELA,STAT1,STAT3,STAT6,TP53,prostaglandin E2
IRF3		transcription regulator		1.75	0.00097	CCL4,CCL5,CXCL10,FAM26F,GBP5,Ifi204 (includes others),IFI44,IFITM2,IFNG,IL15,Ms4a4b (includes others),TLR4	IFN alpha/beta,IFNB1,IL1B,IRF3,IRF7,IRF9,JUN,NFKBIA,NFkB (complex),RELA,STAT1,STAT3,STAT6
EZH2		transcription regulator		1.709	7.25e-05	ADRB1,C3,CDH1,CDKN2B,CLDN10,CSF2,CXCL10,DAB2IP,ITGA1,KLF4,LYPD6B,NCOA7,NFKBIA,S100A4,SATB1	Ap1,ESR1,EZH2,Histone h3,RELA,SP1
CYLD		transcription regulator		1.671	0.0157	FCER1G,IFNG,NTRK3,TNFSF4
PLAG1		transcription regulator		1.633	0.00273	CDC42EP4,ETV4,MAPK11,SMARCD3,TGM2,VEGFA
STAT1		transcription regulator		1.623	6.89e-14	C3,CCL4,CCL5,CCR7,Chi3l3/Chi3l4,CSF2,CSN2,CXCL10,CYSLTR2,DPP4,EGR1,FAM26F,FAS,FCER1G,FOXP3,Gbp2,GBP5,Gbp6 (includes others),HLA-DRB1,Ifi204 (includes others),IFITM1,IFNG,IGF1R,IL15,Irg1,NFE2,PPARG,PRF1,Serpina3g (includes others),SMAD3,Tgtp1/Tgtp2,TLR4	Ap1,IFNG,IL12 (complex),IL1B,JUN,NFKB1,NFKBIA,NFkB (complex),RELA,STAT1,STAT3,STAT6,TP53
BRCA1		transcription regulator		1.622	0.000671	CARD10,CCL5,EGR1,ESR1,FAS,IFITM1,IGF1R,PERP,SMAD3,TNFAIP2,VEGFA	BRCA1,ESR1,ESR2,IRF9,JAK2,JUN,NFKB1,NFKBIA,NFkB (complex),P38 MAPK,RELA,SMAD3,STAT1,STAT3,STAT6,TP53
NFE2L2		transcription regulator		1.552	0.019	ABCG2,AKR1B10,CCL5,CD36,CXCL10,EPAS1,EPHX1,GBE1,IFNG,IFNGR2,KCNMB4,LMNA,P2RX4,RGS11,RYR3,SLC6A9,VEGFA
SP1		transcription regulator		1.528	3.39e-08	AEBP1,AHRR,BACE2,CCL5,CDKN2B,CTH,CXCL10,DNM1,EGR1,ENG,ESR1,FAS,FGFR1,FOXP3,GRIN1,IFITM5,IFNG,IGF1R,IL15,KIT,LTB4R,MAPK8IP1,MMP11,MYCN,NFKBIA,PENK,PLAU,PLAUR,PROCR,SELL,SMAD3,TEAD1,TGM1,TNFSF14,VEGFA	AR,ATF2,Ap1,BRCA1,CTNNB1,Creb,FOS,FOXO1,IRF5,JUN,NFkB (complex),RARA,RELA,RXRA,SMAD2,SMAD3,SMAD4,SMAD7,SP1,STAT3,TP53,TP73,hyaluronic acid
PPARA		ligand-dependent nuclear receptor		1.515	0.00819	C1QB,C3,CD36,CLEC2D,CSN2,CTH,CTSE,CYBB,ENTPD1,GSTM3,HLA-DQA1,IFITM2,IFNG,NFKBIA,PC,PPARG,QPCT,SOCS2,VEGFA	AHR,Ap1,CEBPB,IL6,JUN,NFKB1,NFKBIA,NFkB (complex),NR1H2,NR1H3,PPARA,PPARG,RARA,RELA,RXRA,STAT1,STAT3,TP53,pirinixic acid
ATF4		transcription regulator		1.502	0.000209	ABCG2,CSN2,CTH,CXCR5,KLF4,PENK,PPARG,SLC6A9,SLC7A3,STC2,VEGFA
PPARD		ligand-dependent nuclear receptor		1.435	0.0128	C1QB,C1QC,CD36,MPEG1,PPARG,S100A6,ST3GAL5,THBS1,Tlr12,VEGFA
ETS1		transcription regulator		1.319	4.83e-06	CRTAM,CSF2,EGR1,FOXP3,GZMA,GZMK,IFNG,ITGAE,Klra4 (includes others),PERP,PLAU,PRF1,SELL,Serpinb9b,SLAMF6,TNFSF14,TWIST1,VEGFA	Ap1,CSF2,EGR1,ETS1,FN1,IL10,IRF8,JUN,NFKB1,NFKBIA,NFkB (complex),RELA,STAT1,STAT3,TP53,TP73
TP53		transcription regulator		1.253	1.1e-05	ANXA1,APP,C1QC,CCL4,CD70,CDH1,CNN3,COL6A2,CSF1,CSF2,DBP,DPP4,DUSP4,DUSP5,EGR1,ENG,EPHX1,ESR1,FAS,FOXP3,GATA1,HIST1H1B,Hist2h4 (includes others),HLA-DQA1,ID3,IFNG,IGF1R,KIT,KLF4,LAMA5,LIF,LTB4R,Lyz1/Lyz2,MAPK12,NFE2,NFKBIA,NUPR1,P2RX4,PACSIN1,PERP,PLAU,PLAUR,PLK2,PLXNB2,PPARG,PRDM1,S100A4,Serpina3g (includes others),SERPINC1,SOCS2,STEAP3,TGM2,THBS1,TLR1,TNFAIP2,TWIST1,UNC5B,UPP1,VEGFA	Ap1,ERK,IL6,JUN,NFKB1,NFKBIA,NFkB (complex),RELA,SMAD3,STAT1,STAT3,TNF,TP53
NUPR1	2.599	transcription regulator		1.193	0.0023	AS3MT,ATP6V0A1,DUSP5,ENO2,FAM114A1,GAB2,GPR56,HIST1H1B,HIST1H3A (includes others),HIST2H3C (includes others),IGF1R,KLF4,LIF,NUPR1,P4HA2,RAB39B,RNF122,SH2D5,SLC16A10,TDRKH,TRERF1,UNC5B,UPP1,VANGL1
FBXW7		transcription regulator		1.192	0.00349	APP,CD36,PPARG,TLR4
KLF2		transcription regulator		1.152	0.00279	CCL4,CCR7,EPAS1,ID3,IL1RL1,NFKBIA,PPARG,SELL,THBS1,TNFRSF8
JUN		transcription regulator		1.099	6.98e-07	ANGPTL2,ANXA1,APP,CD244,CDH1,CSF1,CSF2,CSTA,CXCL10,DIO2,FAS,Ifi204 (includes others),IFNG,IGF1R,IL1RL1,LIF,LMNA,MCF2L,NFKBIA,PENK,PLAU,PLAUR,RXRA,SDC1,THBS1,TWIST1,VEGFA,XYLT1	AHR,ATF2,Ap1,FOS,IGF1,IL6,JUN,JUND,NFKB1,NFKBIA,NFkB (complex),RELA,SP1,STAT1,STAT3,TNF,TP53
NFATC2		transcription regulator		1.096	8.65e-05	CSF2,CXCL10,FAS,FOXP3,IFNG,Iigp1,IL15,PLK2,PPARG,SH3BP5,SOCS2,TNFSF8,TSC22D1	ESR1,ESR2,IFNG,IL4,IL6,NFATC2,NFKB1,NFKBIA,NFkB (complex),RELA,STAT1,STAT3,STAT5A,STAT5B,STAT6,TNF,TP53
JUND		transcription regulator		1.065	2.66e-05	CCL5,CSTA,CYBB,IFNG,PENK,PLAU,PLAUR,SDC1,VEGFA	Ap1,ESR1,FOS,IFNG,JUN,JUNB,JUND,NFKB1,NFkB (complex),RELA,SMAD4,STAT1,STAT3,TP53
IRF7		transcription regulator		1.015	0.000919	CCL5,CXCL10,FAM26F,FOXP3,GBP5,Ifi204 (includes others),IFI44,IFITM1,IFITM2,IL15,Ms4a4b (includes others),TLR4	IFN alpha/beta,IFNA2,IFNB1,IRF3,IRF7,Interferon alpha,NFKBIA,NFkB (complex),STAT1,STAT3,STAT5A,STAT5B,STAT6
STAT3		transcription regulator		1.011	6.42e-12	CCL4,CCL5,CD74,CD83,CDH1,CSF2,CSN2,CXCL10,EGR1,EPAS1,ESR1,FAS,FCER1G,FOXP3,FSCN1,Gbp2,HLA-DQA1,HLA-DRB1,Ifi204 (includes others),IFI44,IFITM1,Ifitm2,IFNG,IGF1R,KLF4,LIF,Lyz1/Lyz2,MAF,PLAU,PLAUR,PRDM1,RORA,SERPINB1,STC2,SYNPO,THBS1,TWIST1,VEGFA	EGR1,IFNG,IL6,IRF8,IRF9,JUN,NFKB1,NFKBIA,NFkB (complex),PPARG,RELA,SRC,STAT1,STAT3,STAT6,TNF,TP53
SPI1		transcription regulator		1.008	0.000264	C1QC,CCR7,CHIT1,CSF1,CYBB,EMR1,FCER1G,GATA1,ITGA4,KIT,Klra4 (includes others),Lyz1/Lyz2,TLR4	GATA1,IL6,IRF8,NFKB1,NFKBIA,NFkB (complex),RELA,SPI1,STAT1,STAT3,TNF
GRIP1		transcription regulator		1	0.00179	CCL4,CCL5,CXCL10,IFNG
TCF3		transcription regulator		-1.033	0.00435	CBFA2T3,CDH1,CDKN2B,DAB2IP,FOXP3,GATA1,KIT,KLF4,MYCN,POU2AF1,RORA,SULT2B1,TOX	Ap1,ESR1,Histone h3,RELA,SP1,TCF3
miR-145-5p (and other miRNAs w/seed UCCAGUU)		mature microRNA		-1.107	0.0463	FSCN1,IGF1R,KLF4,SWAP70
PPARG	-3.633	ligand-dependent nuclear receptor		-1.112	0.00555	ABCG2,APP,C3,CCL5,CCR7,CD36,CDH1,CSN2,ENO2,EPHX1,IFNG,KLF4,PC,PPARG,PRDM1,SDC1,SMO,TLR4,VEGFA	CEBPB,JUN,NFKB1,NFKBIA,NFkB (complex),NR1H3,Nr1h,PPARA,PPARG,RARA,RELA,RXRA,SMAD3,STAT1,STAT3,TNF,TP53,rosiglitazone,troglitazone
miR-17-5p (and other miRNAs w/seed AAAGUGC)		mature microRNA		-1.147	0.0046	APP,BAMBI,ESR1,MYLIP,PPARG,VEGFA	NFKB1,NFkB (complex),PTEN,RELA,STAT3,STAT5A,miR-17-5p (and other miRNAs w/seed AAAGUGC)
RB1		transcription regulator		-1.165	0.0302	CDH1,CSN2,DIO2,EGR1,EHD3,FAS,HIST1H1B,IGF1R,KIT,MAF,PPARG,VEGFA
SMARCB1		transcription regulator		-1.194	0.0221	ATP1B1,CDH1,CSF1,DSC2,FAS,IFITM1,PC,PLXNB2,PPARG
GATA3		transcription regulator		-1.256	1.05e-05	CCL5,CDH1,CHST2,FOXP3,GZMA,IFNG,IL1RL1,ITGAE,KIT,MAF,MMP11,PPARG	Ap1,GATA3,IFNG,IL10,IL13,IL4,IRF8,Ige,NFATC2,NFKB1,NFkB (complex),RELA,STAT1,STAT3,STAT6,TP53
JUNB		transcription regulator		-1.265	0.00855	CSF2,FOXP3,IL1RL1,PENK,PLAU,PLAUR,SWAP70,TNFRSF8	Ap1,ESR1,FOS,IL4,JUN,JUNB,JUND,NFkB (complex),RELA,STAT1,STAT3,STAT6,TP53
miR-291a-3p (and other miRNAs w/seed AAGUGCU)		mature microRNA		-1.285	0.00735	APP,C3,CD83,CDH1,ESR1,TBC1D2,VEGFA
RXRA	2.319	ligand-dependent nuclear receptor		-1.304	6.86e-05	ABCG2,APP,C3,CD36,CXCL10,CXCR5,HNF1B,IFNG,MMP11,MYCN,PC,PPARG,RORA,RXRA,SDC1,TCF7,Ugt1a7c,VEGFA	ATF2,Ap1,Creb,FOS,JUN,NFkB (complex),NR1H3,NR4A1,PPARA,PPARG,RARA,RELA,RXRA,RXRB,SMAD3,SP1,STAT1,STAT5a/b,TP53,alitretinoin,estrogen receptor,tretinoin
miR-22-3p (miRNAs w/seed AGCUGCC)		mature microRNA		-1.452	0.000453	ARRB1,BMP7,CYTH3,ESR1,ZCCHC14
miR-29b-3p (and other miRNAs w/seed AGCACCA)		mature microRNA		-1.456	0.0046	ACVR2A,Hmgn3,KLF4,RERE,TET1,TGFB3
NEUROG1		transcription regulator		-1.667	3.92e-05	AMIGO2,C3,CYSLTR2,EPAS1,LRIG1,P4HA2,PLK2,S100A4,THBS1
RUNX1		transcription regulator		-1.746	0.00264	CSF1,CSF2,FAS,FOXP3,NFE2,ST3GAL5,UPP1,VEGFA	AHR,FOS,IL4,JUN,JUND,NFKB1,NFKBIA,NFkB (complex),RELA,RUNX1,STAT1,STAT3,STAT6,TP53,TP73
WT1		transcription regulator		-1.767	1.37e-05	CDH1,CSF1,CXCL10,EGR1,ENO2,IGF1R,KLF4,MYCN,SDC1,Serpinb9b,SH3BP5,TGFB3,THBS1,VEGFA	EGR1,IGF1,IGF1R,JUN,NFKB1,NFkB (complex),RELA,Ras,SP1,STAT1,STAT3,TP53,WT1
EOMES		transcription regulator		-1.951	0.000252	GZMA,IFNG,Klra4 (includes others),PRF1	EOMES,GATA3,RUNX3
IRF2		transcription regulator		-1.96	0.074	CXCL10,Hist2h4 (includes others),IFNG,TLR4
RELB		transcription regulator		-1.962	0.00423	CSF2,ESR1,IFNG,NFKBIA,PRDM1,TNFSF14	AHR,Ap1,NFKB1,NFKBIA,NFkB (complex),REL,RELA,RELB,STAT3,TP53
miR-122-5p (miRNAs w/seed GGAGUGU)		mature microRNA		-1.97	0.0848	BACH2,GPX7,MAPK11,RAB6B
RUNX3		transcription regulator		-1.982	0.00621	CCR7,IFNG,ITGAE,ST3GAL5,TNFSF4
STAT5B		transcription regulator	Inhibited	-2.028	6.58e-05	ASAP1,Cd163l1,CD70,CDH1,CSN2,DDC,ESR1,FAS,FOXP3,IFNG,MAF,SOCS2,TNFSF4,TOX	AKT1,AR,BRCA1,ESR1,NFKB1,NFKBIA,NFkB (complex),PRL,RELA,STAT1,STAT3,STAT5A,STAT5B,STAT5a/b,TNF,TP53
STAT6		transcription regulator	Inhibited	-2.084	3.08e-05	CCL5,CCR7,CSN2,CXCL10,EGR1,EPHX1,FCER1G,FOXP3,Gbp2,GPM6B,Ifi204 (includes others),IFNG,LIF,MAF,Ms4a4b (includes others),NFKBIA,Tgtp1/Tgtp2	Ap1,IL10,IL4,IRF8,IRF9,NFKB1,NFKBIA,NFkB (complex),RELA,STAT1,STAT3,STAT6,TNF,TP53
SMARCA4		transcription regulator	Inhibited	-2.18	2.63e-05	BAMBI,CD74,CDH1,CDKN2B,CSF1,CXCR5,FADS3,GPR56,HRC,ID3,IFITM1,IFITM2,IFNG,KIT,LMNA,PERP,PLAUR,PLS1,PPARG,SEPP1,SOCS2	Ap1,ESR1,Histone h3,JUN,NFkB (complex),RELA,SMARCA4,SP1,STAT3,TP53,TP73
STAT5A		transcription regulator	Inhibited	-2.402	0.00013	CD70,CDH1,CSN2,EPAS1,ESR1,FAS,FCER1G,IFNG,MAF,PPARG,SOCS2,TNFSF4	AKT1,Ap1,BRCA1,ESR1,ESR2,IL13,NFKBIA,NFkB (complex),RELA,STAT1,STAT3,STAT5A,STAT5B,STAT5a/b,TCF3,TNF
HOXA10		transcription regulator	Inhibited	-2.407	0.000768	CDKN2B,CSTA,CYBB,DBP,DPP4,ERG,FCER1G,GATA1,HLA-DQA1,HLA-DQB1,MAPK12,MYCN,WNT10B
TRIM24		transcription regulator	Inhibited	-2.53	6.88e-06	CXCL10,DDX60,FAM26F,Gbp2,HNF1B,IFI44,IFNGR2,Iigp1,Ms4a4b (includes others),SOCS2,Tgtp1/Tgtp2,VEGFA	IRF9,NFKBIA,NFkB (complex),STAT1,STAT3,STAT6,TRIM24
