# Supplementary material for: Antigen-Specific Culture of Memory-like CD8 T Cells for Adoptive Immunotherapy
Source: Oxford University Press journal article supplement (doi:10.1158/2326-6066.cir-14-0038), 2014-05-23
Supplement: 23266066cir140038-sup-tab_2.xlsx [file 23266066cir140038-sup-tab_2.xlsx]

## Sheet: Nvs1
	2-fold change cut-off		Total genes: 1956
CuffDiff Analysis: Naïve vs Group 1
Gene	log2(fold_change)	p_value
Sell	-12.2141	5e-05
Dapl1	-10.688	0.00265
Il6ra	-10.4191	5e-05
Amigo2	-10.1614	0.0104
Slc6a19	-10.147	0.00225
Slc16a5	-10.0665	0.00245
Atp1b1	-9.98022	5e-05
Ampd1	-9.84058	0.00265
Gprc5b	-9.13934	0.01295
Nsg2	-8.62695	5e-05
5830411N06Rik	-8.50525	0.0001
Cacna2d4	-8.45921	0.0022
Pou2af1	-8.32804	0.002
Tcf7	-8.29802	5e-05
Tmie	-8.29732	0.00265
Vipr1	-8.26516	5e-05
App	-8.202	5e-05
H2-Aa	-8.11049	0.00185
Cnn3	-8.01813	5e-05
Dtx1	-7.92647	5e-05
H2-Eb1	-7.78681	0.0025
Sox4	-7.62726	0.00185
Dntt	-7.50096	0.0117
Klf3	-7.37058	5e-05
Ampd3	-7.29385	0.00265
Ccr7	-7.1734	5e-05
Syde1	-7.15088	0.00265
Nrp2	-7.14516	5e-05
Cxcr5	-7.1185	0.00265
Tlr12	-7.0266	5e-05
Gm14085	-6.97986	5e-05
Cd83	-6.95748	0.00265
Akap2	-6.8323	5e-05
Plaur	-6.76408	0.00265
Rapgef4	-6.71224	5e-05
Ifngr2	-6.69632	5e-05
Sh3pxd2a	-6.68412	5e-05
Cd74	-6.67811	5e-05
Wnt5b	-6.61937	0.02775
Spsb1	-6.60847	5e-05
Igf1r	-6.56731	5e-05
P2rx7	-6.54194	0.0002
St8sia1	-6.52009	5e-05
Timp2	-6.50209	5e-05
Ggt5	-6.42342	5e-05
Trerf1	-6.36093	5e-05
Fam101b	-6.30832	5e-05
Cd19	-6.14067	5e-05
Spib	-6.08164	0.0016
Mylip	-6.06484	5e-05
Kcnc1	-6.01195	5e-05
Otud1	-5.89193	5e-05
G0s2	-5.88042	0.00265
Als2cl	-5.82497	5e-05
Cd24a	-5.80185	0.00265
4921525O09Rik	-5.78362	5e-05
Art2b	-5.70758	5e-05
Whrn	-5.69702	5e-05
Xkrx	-5.65139	5e-05
Ptk2	-5.64801	5e-05
Klhl3	-5.62165	0.00185
Eng	-5.48048	5e-05
As3mt	-5.47329	5e-05
Raver2	-5.47195	5e-05
Cxxc5	-5.43977	5e-05
Ramp1	-5.43312	5e-05
Adam6b	-5.38571	5e-05
Rnf122	-5.37718	5e-05
Nckap5l	-5.36967	5e-05
Fcgrt	-5.35139	5e-05
Lrrc23	-5.33742	0.00265
Btbd11	-5.29963	5e-05
Pou6f1	-5.29892	5e-05
Vmn2r96	-5.29652	5e-05
Cybb	-5.29435	5e-05
Fam186b	-5.26355	0.00265
Ntrk3	-5.24101	5e-05
Pacsin1	-5.22897	5e-05
Cd22	-5.22746	5e-05
Plekha1	-5.17863	5e-05
Afap1	-5.17062	5e-05
Actn1	-5.14123	5e-05
Nhsl1	-5.13903	5e-05
Lad1	-5.13249	0.00265
Mn1	-5.13246	0.00265
Tox	-5.07952	5e-05
Il6st	-5.07096	5e-05
Pde2a	-4.98918	5e-05
Plekha6	-4.98582	5e-05
Kcnj16	-4.98399	5e-05
Rere	-4.96764	5e-05
Tet1	-4.89135	5e-05
Cldn10	-4.87014	5e-05
Syk	-4.86514	5e-05
C1qc	-4.86208	0.00265
Irf6	-4.85793	5e-05
Vmn2r97	-4.8282	5e-05
Galnt10	-4.80942	5e-05
Gpr133	-4.7849	0.00265
Ttc28	-4.72768	5e-05
Rgmb	-4.71592	5e-05
Hs3st3b1	-4.71105	5e-05
Tmem108	-4.70124	5e-05
2310042E22Rik	-4.6884	5e-05
H2-Ab1	-4.59136	5e-05
Qpct	-4.56671	5e-05
Ralgps2	-4.55731	5e-05
Gm10638	-4.55581	0.00455
Lman1l	-4.54595	5e-05
Slpi	-4.544	5e-05
BC024582	-4.54089	0.03515
Cnr2	-4.54078	5e-05
Trib2	-4.53251	5e-05
Mpeg1	-4.51495	5e-05
Impg2	-4.51438	5e-05
Enc1	-4.51126	5e-05
Gm11346	-4.50776	5e-05
Tlr1	-4.49005	5e-05
Itga4	-4.46941	5e-05
2010001M09Rik	-4.46685	0.0016
Adcy6	-4.46518	5e-05
Zhx2	-4.46389	5e-05
Gprasp2	-4.45966	0.0003
Lrig1	-4.45376	5e-05
Nacad	-4.41984	5e-05
Pak1	-4.38404	5e-05
Tsc22d3	-4.37366	5e-05
Ephx1	-4.35131	5e-05
Card9	-4.34842	5e-05
BC051537	-4.34785	5e-05
Tcf7l1	-4.34443	5e-05
2410066E13Rik	-4.33487	5e-05
Mmp15	-4.29092	5e-05
Arhgef11	-4.28921	5e-05
Gm128	-4.28805	0.0018
Id3	-4.27951	5e-05
Lyz2	-4.2668	5e-05
Zfp773	-4.25994	5e-05
St6gal1	-4.25741	5e-05
Aff3	-4.25311	5e-05
Fam124b	-4.24064	5e-05
Cd40lg	-4.23744	5e-05
Aldh3b1	-4.20433	0.00265
Nacc2	-4.20311	5e-05
1700102P08Rik	-4.17883	5e-05
Cpm	-4.17376	5e-05
Lhfpl1	-4.17261	0.00265
Zfp516	-4.17251	5e-05
Dock4	-4.17075	5e-05
4930481A15Rik	-4.16253	5e-05
Acvrl1	-4.15131	5e-05
Ptpn14	-4.15034	5e-05
Bend5	-4.14606	5e-05
4933430H15Rik	-4.13376	5e-05
Hsd17b1	-4.12773	0.00265
Bach2	-4.12515	5e-05
Tcp11l2	-4.12402	5e-05
Tgfb1i1	-4.1223	5e-05
Armcx2	-4.11149	5e-05
Ly86	-4.0999	0.0027
Mcoln3	-4.09054	5e-05
Ift81	-4.08917	0.0016
Bank1	-4.08544	5e-05
Gm15708	-4.08191	5e-05
Itgae	-4.08041	5e-05
Zfp318	-4.05615	5e-05
3830403N18Rik	-4.0515	5e-05
Fsd2	-4.04308	5e-05
Bambi-ps1	-4.03877	5e-05
Zfp710	-4.01724	5e-05
Elovl7	-4.01709	5e-05
Zfp831	-4.01293	5e-05
Fas	-4.00597	5e-05
Tsc22d1	-4.0014	5e-05
Pgap1	-3.99355	5e-05
Inadl	-3.99013	5e-05
Rab4a	-3.98918	5e-05
Pnck	-3.98737	0.00175
Amy1	-3.98379	0.0024
Aldh1l1	-3.98258	5e-05
Cnksr3	-3.97977	5e-05
B430306N03Rik	-3.97159	5e-05
Zbtb20	-3.96778	5e-05
Begain	-3.94975	5e-05
Fam46c	-3.93877	5e-05
Sidt1	-3.93812	5e-05
Rab6b	-3.93642	5e-05
Tdgf1	-3.93334	0.00015
Nfkbia	-3.89624	5e-05
Cyp2r1	-3.88785	5e-05
Gpx3	-3.88688	0.00265
Csf3r	-3.88173	5e-05
Igf2bp2	-3.87293	5e-05
Dzip1	-3.87161	5e-05
Satb1	-3.86649	5e-05
Fam131a	-3.86473	0.0202
Fbxw10	-3.86153	0.0028
Sbf2	-3.86098	5e-05
Arl5c	-3.85602	5e-05
Gpd1	-3.83012	0.0032
Slamf6	-3.81976	5e-05
Tagap	-3.81893	5e-05
Slc22a17	-3.81698	5e-05
Sema4b	-3.7991	5e-05
Hcn3	-3.79494	5e-05
Unc5cl	-3.78414	5e-05
Cxcr4	-3.78266	5e-05
Pdzd4	-3.77531	5e-05
Rnf144a	-3.77268	5e-05
Mtap7	-3.76853	5e-05
Sfmbt2	-3.76424	5e-05
Adrb2	-3.76177	5e-05
Rdh5	-3.75688	5e-05
Klf2	-3.7421	5e-05
Emr1	-3.73299	0.00345
Mast4	-3.72975	5e-05
Slc4a10	-3.72593	5e-05
Clcf1	-3.72481	5e-05
Slc12a7	-3.72326	5e-05
Fam65b	-3.72173	5e-05
Rcn3	-3.70555	5e-05
Ptpdc1	-3.69663	5e-05
Zfp879	-3.69189	0.00275
Sema4g	-3.65763	5e-05
Mical3	-3.64649	5e-05
Sh2d4b	-3.63875	0.00275
Cd7	-3.63673	5e-05
Espn	-3.6298	5e-05
Gm8221	-3.62596	5e-05
Pik3ip1	-3.61965	5e-05
Peg13	-3.60771	5e-05
E130102H24Rik	-3.60353	5e-05
Bcl6	-3.60269	5e-05
BC057022	-3.57993	5e-05
2610035D17Rik	-3.57621	5e-05
Fam110b	-3.57426	0.00305
Scml4	-3.57001	5e-05
Sag	-3.56952	5e-05
AI646023	-3.55934	5e-05
Rgs10	-3.55519	5e-05
Dtx4	-3.55483	5e-05
P2rx4	-3.55179	5e-05
Chi3l3	-3.53751	0.0025
Mef2c	-3.53613	5e-05
Fry	-3.53152	5e-05
Cdc42ep4	-3.52803	5e-05
Rftn2	-3.51728	5e-05
Txk	-3.51445	5e-05
4921515J06Rik	-3.50978	0.0004
Cmah	-3.50698	5e-05
Dnajc28	-3.50196	5e-05
Prrt1	-3.49822	5e-05
Scarf1	-3.49718	5e-05
Glt8d2	-3.49671	5e-05
Zfp467	-3.49034	5e-05
Map3k9	-3.48871	5e-05
Zfp395	-3.48557	5e-05
Sec31b	-3.47924	5e-05
Abca1	-3.47695	5e-05
Tbx6	-3.47132	5e-05
Atp10d	-3.46987	5e-05
D930028M14Rik	-3.4693	5e-05
2310042D19Rik	-3.45888	5e-05
Guca1b	-3.44381	5e-05
Arrdc4	-3.43643	0.00215
Igsf3	-3.4346	5e-05
Lef1	-3.43449	5e-05
Tgtp1	-3.43398	5e-05
Frat2	-3.43213	5e-05
Kcnmb4	-3.43064	5e-05
Kdm5b	-3.42521	5e-05
Prkcb	-3.42076	5e-05
C85492	-3.41505	5e-05
Nbeal1	-3.41032	5e-05
Ldlrap1	-3.4102	5e-05
Esr1	-3.40672	5e-05
AB124611	-3.39288	5e-05
Gpr155	-3.3869	5e-05
Olfr1033	-3.3763	5e-05
Rps6ka2	-3.37073	5e-05
Palm3	-3.37008	5e-05
Ddc	-3.35494	5e-05
Ehd3	-3.35403	5e-05
Nlrc4	-3.34627	5e-05
Sp6	-3.33921	5e-05
Snn	-3.33343	5e-05
Col11a2	-3.32901	5e-05
Srsf12	-3.32462	5e-05
Vmn2r84	-3.31436	5e-05
Cd163l1	-3.30983	5e-05
Cd1d2	-3.29317	0.0072
Gm7030	-3.28367	0.00395
4933403G14Rik	-3.2783	5e-05
Tmc3	-3.2731	5e-05
Arhgap29	-3.2646	5e-05
Sepp1	-3.26156	5e-05
A230072E10Rik	-3.26109	5e-05
Apol7e	-3.25714	5e-05
S1pr1	-3.25564	5e-05
Smad7	-3.24411	5e-05
Kif5c	-3.24351	5e-05
Dnahc8	-3.23936	5e-05
Xlr3b	-3.22553	5e-05
Spo11	-3.22108	5e-05
BC065397	-3.21904	5e-05
Fbxo10	-3.21278	5e-05
1700058G18Rik	-3.20475	0.0344
Rarg	-3.20005	5e-05
Acp5	-3.1952	5e-05
Map4k3	-3.19339	5e-05
Socs3	-3.19043	5e-05
Kcnh2	-3.17912	5e-05
Gramd4	-3.17366	5e-05
Dusp7	-3.17243	5e-05
Tnfaip3	-3.15839	5e-05
Nfe2l3	-3.15307	0.00015
E130304F04Rik	-3.14747	5e-05
Smo	-3.14034	5e-05
Dirc2	-3.13987	5e-05
Mex3a	-3.1374	5e-05
Slc25a27	-3.13579	5e-05
Ctsl	-3.13237	5e-05
Hist2h3c1	-3.13233	5e-05
Gata1	-3.13211	5e-05
Il11ra1	-3.11865	5e-05
Gpr125	-3.11074	5e-05
Baz2b	-3.10185	5e-05
Nedd4l	-3.09865	5e-05
Zfp874b	-3.09537	5e-05
5730508B09Rik	-3.09422	5e-05
Runx1	-3.09394	5e-05
Dok3	-3.09352	5e-05
Axin2	-3.08527	5e-05
Rnase6	-3.08359	0.00015
Cd81	-3.08303	5e-05
Arntl	-3.07545	5e-05
Casz1	-3.07131	5e-05
Mll3	-3.06677	5e-05
Arrb1	-3.06362	5e-05
Fos	-3.06338	5e-05
Gm12185	-3.06335	5e-05
Nod2	-3.06038	5e-05
Gm10640	-3.04854	5e-05
Klra7	-3.04325	0.00035
Il7r	-3.04119	5e-05
Art4	-3.03502	5e-05
Nfix	-3.02563	5e-05
Mmp11	-3.02296	5e-05
Rab3ip	-3.01393	5e-05
2810410L24Rik	-3.01275	0.0094
4921507P07Rik	-3.00806	0.0022
Sbk1	-3.0063	5e-05
Laptm4b	-3.00519	5e-05
Zfp174	-3.00519	5e-05
Emilin1	-3.00087	5e-05
Acer2	-2.99971	5e-05
4933432I09Rik	-2.99927	0.0168
Ptov1	-2.98223	5e-05
Gm11944	-2.98137	0.005
Abcg3	-2.98034	5e-05
Phyhd1	-2.97966	5e-05
Cdr2l	-2.97881	5e-05
Amz1	-2.97871	5e-05
Btg1	-2.97781	5e-05
Zfp238	-2.9662	5e-05
Zfp354c	-2.96176	5e-05
Wdfy4	-2.9592	5e-05
Bcl9l	-2.95914	5e-05
Utrn	-2.95268	5e-05
Vangl2	-2.94661	5e-05
1190002H23Rik	-2.94093	5e-05
Tnfsf8	-2.94012	5e-05
Cnga1	-2.93922	5e-05
Epb4.1l1	-2.93911	5e-05
Jhdm1d	-2.93728	5e-05
Plekhg2	-2.93609	5e-05
Plcb2	-2.934	5e-05
Zfp36l1	-2.9301	5e-05
5031434O11Rik	-2.92244	5e-05
Zbtb4	-2.92076	5e-05
Ssh2	-2.91972	5e-05
Lypd6b	-2.91855	5e-05
Gprasp1	-2.91389	5e-05
Dstyk	-2.90975	5e-05
Clec2g	-2.90584	5e-05
Ovgp1	-2.90232	5e-05
Crtam	-2.89332	5e-05
Bend4	-2.88611	5e-05
Npff	-2.87747	5e-05
Cd55	-2.86987	5e-05
Snx30	-2.86903	5e-05
Macf1	-2.86762	5e-05
Plp1	-2.86338	5e-05
Hs6st1	-2.86199	5e-05
Slc39a2	-2.8618	5e-05
Ggnbp1	-2.86062	5e-05
Sipa1l2	-2.85637	5e-05
C1qb	-2.84948	0.0002
Apobec2	-2.845	5e-05
Cd302	-2.84304	0.0013
Aqp11	-2.84254	0.0015
Nr1d2	-2.8423	5e-05
Ecm1	-2.84167	5e-05
Pdcd4	-2.83921	5e-05
Prpf40b	-2.8391	5e-05
Cd6	-2.83796	5e-05
Mia1	-2.83215	0.00655
Mst1	-2.82852	5e-05
Ciita	-2.81958	5e-05
C630004H02Rik	-2.81724	5e-05
Stx2	-2.81675	5e-05
Pltp	-2.81604	5e-05
Clec2i	-2.81551	5e-05
St3gal1	-2.81459	5e-05
Matk	-2.81303	5e-05
Klf4	-2.81164	5e-05
Igsf6	-2.8094	0.00035
Ikbke	-2.80889	5e-05
Rxra	-2.80076	5e-05
D18Ertd653e	-2.79457	5e-05
Lrrc24	-2.79115	5e-05
Ddx43	-2.78381	5e-05
Fbxo32	-2.78368	5e-05
Cuedc1	-2.78063	5e-05
Nlgn3	-2.77514	5e-05
Frat1	-2.77343	5e-05
Fam117a	-2.77207	5e-05
Crebl2	-2.77204	5e-05
Slc25a23	-2.7699	5e-05
Armcx1	-2.76697	5e-05
Wbscr27	-2.76619	5e-05
Trim2	-2.75538	5e-05
Nfia	-2.74609	5e-05
Calcrl	-2.74212	5e-05
Map4k5	-2.73935	5e-05
Sbsn	-2.73665	0.0001
Col20a1	-2.73496	5e-05
Slc3a1	-2.7296	5e-05
Acrbp	-2.72729	5e-05
Gsn	-2.72157	5e-05
Mex3b	-2.71633	5e-05
Efna2	-2.71609	0.0004
Basp1	-2.71257	5e-05
Zfp811	-2.71215	0.0003
E130215H24Rik	-2.71176	5e-05
Fam49a	-2.70964	5e-05
Rasal1	-2.70529	5e-05
Shf	-2.70496	5e-05
H2-K2	-2.70475	5e-05
Ppp1r13b	-2.70445	5e-05
Slc23a3	-2.70256	0.00135
Irs2	-2.69073	5e-05
Zscan18	-2.68937	5e-05
Tnfrsf26	-2.68879	5e-05
Art3	-2.6887	0.00985
Efnb1	-2.68597	5e-05
Dnajc27	-2.68214	5e-05
Rwdd3	-2.68211	0.0001
Cyth3	-2.67943	5e-05
Nat14	-2.67291	5e-05
Aig1	-2.67265	5e-05
Shb	-2.6671	5e-05
Ext1	-2.6631	5e-05
Ccdc126	-2.65722	5e-05
Siah1a	-2.65662	5e-05
Itga10	-2.65508	5e-05
Dusp10	-2.65234	5e-05
Kif1b	-2.65181	5e-05
Lynx1	-2.64311	5e-05
Ly6k	-2.64154	5e-05
Arhgap5	-2.64124	5e-05
A930005H10Rik	-2.64106	5e-05
Sh3bp5	-2.63744	5e-05
Klhdc1	-2.63535	5e-05
2700081O15Rik	-2.63335	5e-05
Phf1	-2.62602	5e-05
4831440E17Rik	-2.62329	5e-05
Wfikkn2	-2.61518	5e-05
Lmo2	-2.61114	5e-05
Tnfrsf14	-2.60691	5e-05
C130026I21Rik	-2.60338	5e-05
Arhgap31	-2.60305	5e-05
Camk2b	-2.60215	5e-05
Clcn2	-2.60206	5e-05
Aldh6a1	-2.60148	5e-05
Gramd3	-2.60004	5e-05
Cyp2s1	-2.59892	5e-05
Fam189b	-2.59808	5e-05
Ager	-2.59325	5e-05
Orai2	-2.58812	5e-05
Csrnp2	-2.58631	5e-05
Sh2b3	-2.58525	5e-05
Kif13a	-2.58387	5e-05
Sez6l2	-2.57616	5e-05
Gm13889	-2.56441	0.01875
Art2a-ps	-2.56261	5e-05
Zfp658	-2.5625	5e-05
Ctss	-2.55313	5e-05
Pkd1	-2.54504	5e-05
Dync2li1	-2.54368	0.0004
Car15	-2.53941	5e-05
Enpp5	-2.53755	5e-05
Pard6g	-2.53737	5e-05
Abtb2	-2.53135	5e-05
Socs5	-2.53119	5e-05
N4bp2l1	-2.52565	5e-05
Fgf13	-2.52366	5e-05
Hsd17b11	-2.52115	5e-05
Zfp383	-2.52094	5e-05
Usp28	-2.52091	5e-05
Stx1a	-2.51979	5e-05
Susd2	-2.51867	5e-05
Mgrn1	-2.51364	5e-05
Pnpla1	-2.51073	5e-05
Dyrk2	-2.50853	5e-05
Clic3	-2.50545	5e-05
A930015D03Rik	-2.50086	5e-05
4930524L23Rik	-2.49812	0.0045
Zfp14	-2.49197	5e-05
Gm20324	-2.48312	5e-05
Fam109a	-2.48213	5e-05
Tgtp2	-2.48207	5e-05
Dapk1	-2.48168	5e-05
Kctd21	-2.48007	5e-05
Il1rl2	-2.47764	5e-05
Smad1	-2.471	5e-05
A630019I02Rik	-2.46527	0.00025
Mll2	-2.46493	5e-05
Trio	-2.4641	5e-05
A430078G23Rik	-2.45864	5e-05
Prickle1	-2.45804	5e-05
F2rl1	-2.45617	5e-05
Slc14a1	-2.45489	5e-05
Mapk11	-2.45261	5e-05
Ets1	-2.45224	5e-05
Pex26	-2.45172	5e-05
B330016D10Rik	-2.45131	5e-05
Tubb2b	-2.45081	5e-05
Ttc3	-2.45033	5e-05
Aqp3	-2.4492	5e-05
Sult1a1	-2.44872	0.00435
Dnase1l2	-2.44484	5e-05
Pmel	-2.44299	5e-05
Wnk4	-2.44241	5e-05
Pcbp3	-2.44036	5e-05
Rnf167	-2.43828	5e-05
Rarb	-2.43649	5e-05
Kbtbd11	-2.43554	5e-05
Ldhb	-2.43486	5e-05
Sqrdl	-2.42633	5e-05
Chrnb2	-2.422	5e-05
Plekho1	-2.42129	5e-05
Fbxl12	-2.41979	5e-05
L3mbtl3	-2.41744	5e-05
D8Ertd82e	-2.41533	5e-05
Klhl24	-2.41429	5e-05
Gm11696	-2.41043	5e-05
2010016I18Rik	-2.40953	5e-05
Atp8a2	-2.40842	5e-05
Itpr2	-2.4081	5e-05
Arhgap39	-2.40555	5e-05
Zfp708	-2.40494	5e-05
Zfhx2	-2.39972	5e-05
Nr1d1	-2.39933	5e-05
D130040H23Rik	-2.39931	5e-05
F12	-2.39546	0.00055
Filip1l	-2.39507	5e-05
Gm12505	-2.395	5e-05
Asap1	-2.39463	5e-05
Fam53b	-2.39418	5e-05
Kifc2	-2.39049	5e-05
Gpr182	-2.3894	0.005
Zfp281	-2.38695	5e-05
Pde4b	-2.38685	5e-05
Il27ra	-2.38127	5e-05
1810034E14Rik	-2.381	5e-05
Atp8a1	-2.38041	5e-05
Cdh24	-2.3792	5e-05
Gbp2	-2.37666	5e-05
Card6	-2.37208	5e-05
Ccdc30	-2.36838	5e-05
2010015L04Rik	-2.36652	5e-05
Plekhn1	-2.3661	5e-05
Sesn1	-2.36577	5e-05
Hectd2	-2.36511	5e-05
Rragd	-2.3601	5e-05
2510009E07Rik	-2.35699	5e-05
Chd6	-2.35298	5e-05
4932438A13Rik	-2.35057	5e-05
Irf1	-2.34809	5e-05
Camk1d	-2.3456	5e-05
Fam113b	-2.34334	5e-05
Abcc5	-2.34082	5e-05
Tmem63a	-2.34071	5e-05
Nfkbiz	-2.34062	5e-05
Zfp493	-2.3399	5e-05
Ms4a4c	-2.3374	5e-05
Paqr8	-2.33719	5e-05
Acad10	-2.33501	5e-05
Gm10791	-2.33204	0.0084
Id1	-2.33201	0.00395
Arhgef18	-2.32286	5e-05
Actn2	-2.3221	5e-05
Neurl2	-2.31995	5e-05
A430088P11Rik	-2.31961	5e-05
Tmem71	-2.3166	5e-05
4931403E22Rik	-2.31032	0.00405
Ppp1r3f	-2.30832	5e-05
Fhit	-2.30386	0.0065
Vamp1	-2.30074	5e-05
Clk1	-2.29943	5e-05
Sdc4	-2.29848	5e-05
Mdn1	-2.29787	5e-05
Usp11	-2.29633	5e-05
Vamp5	-2.29103	5e-05
Slc7a7	-2.28834	0.00015
Relb	-2.28578	5e-05
Apoe	-2.28554	5e-05
Pdk2	-2.2855	5e-05
AA415398	-2.27768	5e-05
Nmnat2	-2.27175	5e-05
Bbc3	-2.26997	5e-05
Camsap2	-2.26997	5e-05
Fbxo24	-2.26913	5e-05
Tubb2a	-2.26801	5e-05
Sall2	-2.26594	5e-05
Akap8l	-2.26586	5e-05
Acpp	-2.26054	5e-05
Serpini1	-2.25915	5e-05
Nod1	-2.25543	5e-05
Acvr2a	-2.25119	5e-05
Celsr2	-2.25076	5e-05
Iigp1	-2.24715	5e-05
Tcap	-2.2448	0.0107
Qprt	-2.2446	5e-05
Ctrl	-2.24123	5e-05
Cd5	-2.24083	5e-05
Tnrc6b	-2.24075	5e-05
Kdm6b	-2.23764	5e-05
1700029J07Rik	-2.23578	5e-05
Jmy	-2.23486	5e-05
Peli1	-2.23036	5e-05
Lrrc1	-2.23034	5e-05
Map3k14	-2.2302	5e-05
Acvr1b	-2.22954	5e-05
Zdhhc14	-2.22951	5e-05
Samd3	-2.22517	5e-05
2810001G20Rik	-2.22378	5e-05
Gpr146	-2.22372	5e-05
Pecam1	-2.22281	5e-05
Snx29	-2.22162	5e-05
Smg1	-2.22094	5e-05
Slc25a2	-2.22077	0.00375
Zc3h12d	-2.22013	5e-05
D17H6S56E-3	-2.21609	0.00015
Dnahc17	-2.21607	5e-05
Zmynd10	-2.21294	5e-05
Fgfr1	-2.21293	5e-05
Psd	-2.21155	5e-05
Tmod4	-2.21088	5e-05
A330023F24Rik	-2.20949	5e-05
Ccdc117	-2.20893	5e-05
AW011738	-2.20613	5e-05
Cacnb1	-2.20342	5e-05
Rbm12b	-2.2032	5e-05
5430402O13Rik	-2.19778	0.00535
Txnip	-2.19273	5e-05
Pim2	-2.18982	5e-05
4930473A06Rik	-2.18053	5e-05
Sh3d19	-2.17766	5e-05
Zfp12	-2.17746	5e-05
Dnajb2	-2.17432	5e-05
Zscan2	-2.17215	5e-05
Nhlrc1	-2.17188	5e-05
Tgm2	-2.17151	5e-05
Zrsr1	-2.1712	5e-05
Slc26a11	-2.16826	5e-05
Insr	-2.16693	5e-05
Rtn4rl1	-2.16598	5e-05
Dlg3	-2.16446	5e-05
Serinc5	-2.1617	5e-05
Ltb	-2.16076	5e-05
Nlk	-2.16071	5e-05
Plxnb1	-2.15992	5e-05
Chad	-2.15699	0.00015
Btg2	-2.15692	5e-05
Icam1	-2.15632	5e-05
Tulp3	-2.15262	5e-05
1110017F19Rik	-2.15179	0.01415
Dopey1	-2.1512	5e-05
Gm15800	-2.14994	5e-05
4933426M11Rik	-2.14976	5e-05
E130112N10Rik	-2.14843	5e-05
Mll1	-2.14764	5e-05
Hist3h2a	-2.14678	5e-05
Kcnd1	-2.1427	0.00045
Fam84b	-2.14179	5e-05
A930001N09Rik	-2.13736	5e-05
Rictor	-2.13619	5e-05
Appl2	-2.13298	5e-05
Arhgef3	-2.12881	5e-05
Ash1l	-2.12557	5e-05
Mapk1ip1	-2.12391	5e-05
Cd2ap	-2.12238	5e-05
Mfhas1	-2.12063	5e-05
Dgka	-2.11905	5e-05
Maged1	-2.11818	5e-05
Ptpla	-2.11751	5e-05
Smad5	-2.10906	5e-05
Smagp	-2.10858	0.0006
Usp33	-2.10806	5e-05
Zfp72	-2.10717	5e-05
Ublcp1	-2.10528	5e-05
Egfl8	-2.10508	5e-05
Selenbp1	-2.10388	5e-05
Lphn1	-2.10166	5e-05
Ccin	-2.1004	0.0006
Jup	-2.09799	5e-05
Fbxl22	-2.09508	5e-05
Sap25	-2.09393	5e-05
BC016423	-2.08926	5e-05
Sfxn5	-2.08899	5e-05
D930016D06Rik	-2.08862	5e-05
Doc2g	-2.0886	5e-05
Mettl8	-2.08803	5e-05
Cul9	-2.08474	5e-05
Gm527	-2.08383	5e-05
Tmc4	-2.08255	5e-05
Tmem22	-2.08075	5e-05
Usp53	-2.08033	5e-05
Parp3	-2.07844	5e-05
Phf21a	-2.07685	5e-05
Krba1	-2.07088	5e-05
1700094D03Rik	-2.06764	5e-05
Ss18l1	-2.06515	5e-05
Asb13	-2.06501	5e-05
Mfsd4	-2.06457	5e-05
Zfp53	-2.06352	5e-05
9330151L19Rik	-2.06307	5e-05
A730017L22Rik	-2.06032	5e-05
Fmo5	-2.05971	5e-05
Psd2	-2.05968	5e-05
Tob1	-2.05872	5e-05
Ttyh3	-2.05597	5e-05
Slc15a2	-2.05488	5e-05
1700021C14Rik	-2.05286	5e-05
Cdk20	-2.0525	5e-05
B930003M22Rik	-2.04888	5e-05
Mcam	-2.04852	5e-05
H2-DMa	-2.04805	5e-05
Gfod2	-2.04507	5e-05
Ifi47	-2.04342	5e-05
2013-09-08	-2.04327	5e-05
Rapgef6	-2.04313	5e-05
Carns1	-2.04283	5e-05
Thra	-2.0405	5e-05
Zfp420	-2.04022	5e-05
Zc3h12b	-2.03757	5e-05
Trp53inp1	-2.03693	5e-05
Cxx1c	-2.03661	5e-05
Kctd12	-2.03627	5e-05
6230400D17Rik	-2.0313	0.00025
Gp1ba	-2.0312	5e-05
Tanc1	-2.03031	5e-05
Macrod1	-2.03028	5e-05
4930417O13Rik	-2.02857	5e-05
1500017E21Rik	-2.02663	5e-05
Tespa1	-2.02638	5e-05
Ctse	-2.02597	5e-05
Sgk1	-2.02498	5e-05
Zfp874a	-2.02407	5e-05
Adam4	-2.02294	5e-05
Atg4c	-2.01979	5e-05
Smpdl3a	-2.01709	5e-05
Dleu7	-2.01511	0.0008
Cd84	-2.01393	5e-05
Usp35	-2.01284	5e-05
Gm12216	-2.01258	5e-05
Gm4980	-2.01076	5e-05
Lbh	-2.01043	5e-05
Cd8b1	-2.01008	5e-05
BC005561	-2.00898	5e-05
Cpne8	-2.00812	5e-05
Slc17a9	-2.00775	5e-05
Crebbp	-2.00348	5e-05
Gng2	2.00133	5e-05
Cep72	2.0017	5e-05
Crat	2.00236	5e-05
Obfc2a	2.00562	5e-05
Wdr34	2.00716	5e-05
Itpka	2.01109	0.00405
Ticam2	2.01345	5e-05
Rhod	2.01528	5e-05
Slc25a10	2.01609	5e-05
Chchd6	2.01738	5e-05
Eif5a2	2.02022	5e-05
Mcm6	2.02106	5e-05
LOC100504703	2.0218	0.0041
Rhoq	2.02255	5e-05
Maf	2.02901	5e-05
Lyrm1	2.02936	5e-05
C77080	2.03224	5e-05
Alad	2.03262	5e-05
Ppm1n	2.03337	5e-05
Zfp934	2.03401	5e-05
Dgat1	2.03446	5e-05
Mid1ip1	2.03937	5e-05
1500010J02Rik	2.0403	5e-05
Hmgn5	2.04244	5e-05
Aldh7a1	2.04426	5e-05
Nphp4	2.04599	5e-05
Phgdh	2.04696	5e-05
Snx9	2.04759	5e-05
Nespas	2.05236	5e-05
Lss	2.05393	5e-05
2013-09-11	2.05408	5e-05
Adssl1	2.05542	5e-05
Gna15	2.06027	5e-05
Clic4	2.06241	5e-05
Six5	2.06577	5e-05
Mafg	2.06588	5e-05
Tst	2.06654	5e-05
Naip5	2.0699	5e-05
Mtap7d3	2.07206	5e-05
Grhpr	2.07275	5e-05
Metrn	2.07887	5e-05
B230118H07Rik	2.07944	5e-05
Chsy1	2.08038	5e-05
Aars	2.0811	5e-05
Rad51c	2.08626	5e-05
Tjp3	2.08834	5e-05
1810014F10Rik	2.08955	5e-05
Pop1	2.09101	5e-05
Tspan31	2.0932	5e-05
Pcbp4	2.09338	5e-05
Snrpd1	2.09537	5e-05
Nudt4	2.09673	5e-05
Enthd1	2.09688	5e-05
Mcm2	2.09813	5e-05
Nupr1	2.10126	0.0161
Pla2g4c	2.10452	5e-05
Gale	2.10631	5e-05
Slc25a13	2.10772	5e-05
Abi2	2.10862	5e-05
B4galt4	2.10874	5e-05
Ccdc50	2.10902	5e-05
Susd3	2.11214	5e-05
H2afz	2.11335	5e-05
Arid3a	2.11447	5e-05
Zfp608	2.11517	5e-05
Pcyox1l	2.11742	5e-05
Ribc1	2.11762	5e-05
Stag3	2.11771	5e-05
Gpr62	2.11772	0.01725
BC035044	2.11792	5e-05
S100a11	2.11867	5e-05
2210408I21Rik	2.11906	5e-05
0610010F05Rik	2.12428	5e-05
Cbfa2t3	2.12529	5e-05
Fah	2.12548	5e-05
Cyp4f16	2.13233	5e-05
Fam110a	2.13752	5e-05
Carhsp1	2.1392	5e-05
Rbm3	2.13939	5e-05
Slfn3	2.14092	5e-05
Dnalc1	2.14174	5e-05
Unc93b1	2.14314	5e-05
Magohb	2.14328	5e-05
Capn2	2.14516	5e-05
Yes1	2.14791	5e-05
3110045C21Rik	2.14868	0.00035
Pqlc3	2.14917	5e-05
Il18r1	2.15367	5e-05
Actg1	2.15574	5e-05
Rnd1	2.15701	5e-05
BC046404	2.15867	5e-05
Lrrc25	2.15954	0.0003
Naa20	2.16004	5e-05
Errfi1	2.16156	5e-05
Tuba1b	2.16265	5e-05
Dhrs13	2.1628	5e-05
Sh3bgrl	2.16373	5e-05
Marveld2	2.16687	5e-05
Alg6	2.17551	5e-05
Prss30	2.17576	5e-05
Trib1	2.17819	5e-05
S100a10	2.18089	5e-05
Hopx	2.1846	5e-05
Lrrc27	2.18636	5e-05
9130206I24Rik	2.18907	5e-05
Gem	2.18911	5e-05
Muc1	2.19032	5e-05
Serpina3f	2.19081	5e-05
4933436C20Rik	2.19084	0.02395
Acoxl	2.19099	5e-05
Tyro3	2.191	5e-05
Fam92a	2.19167	5e-05
Lancl2	2.19169	5e-05
Cacnb3	2.19235	5e-05
Prr13	2.19254	5e-05
Unc13a	2.19355	5e-05
Kit	2.19656	5e-05
Gm10658	2.19855	5e-05
Lrdd	2.19877	5e-05
Chpt1	2.20167	5e-05
Plxnd1	2.20233	5e-05
2610029I01Rik	2.20296	5e-05
Cenpv	2.2041	5e-05
Upk1a	2.20733	5e-05
4930579G24Rik	2.20845	5e-05
Xrcc2	2.21118	5e-05
Gm15417	2.21134	0.0368
Trp53inp2	2.21356	5e-05
Stxbp1	2.21469	5e-05
A030009H04Rik	2.2163	5e-05
Chst12	2.22141	5e-05
Xbp1	2.22152	5e-05
St3gal5	2.22322	5e-05
Ldha	2.22404	5e-05
Fuca2	2.2241	5e-05
Tfap2a	2.22793	5e-05
Megf11	2.22969	5e-05
Rdbp	2.23025	5e-05
Itgav	2.23558	5e-05
Rnd2	2.23859	0.00715
3200002M19Rik	2.24192	5e-05
Lyn	2.24414	5e-05
4930429B21Rik	2.24948	5e-05
Myh10	2.25193	5e-05
Sulf2	2.255	5e-05
Amdhd2	2.25757	5e-05
Dfna5	2.258	5e-05
Kif23	2.25819	5e-05
Hist1h4h	2.25832	0.0282
4930422G04Rik	2.25916	5e-05
Adamts14	2.2602	5e-05
Pmvk	2.26252	5e-05
Gm4902	2.26432	5e-05
Gm5506	2.265	5e-05
Rabl2	2.26654	5e-05
Uchl1	2.27051	0.0005
Scpep1	2.271	5e-05
Arsb	2.27349	5e-05
Tgfb3	2.27463	5e-05
Mpp6	2.27476	5e-05
Tsga10	2.27984	5e-05
Lxn	2.28005	5e-05
Hist1h1e	2.28053	5e-05
Dbi	2.28066	5e-05
Trim46	2.28092	5e-05
Gmds	2.28146	5e-05
Zcchc3	2.28466	5e-05
Thop1	2.28485	5e-05
Adam19	2.28553	5e-05
Dsn1	2.28828	5e-05
Stard4	2.28981	5e-05
Tnfsf9	2.292	5e-05
Tbkbp1	2.29261	5e-05
0610040B10Rik	2.29738	0.02285
Mcm7	2.29859	5e-05
Igj	2.30374	5e-05
Ceacam16	2.30424	5e-05
Tnni3	2.30567	0.00485
Sap30	2.3059	5e-05
Rfc5	2.31271	5e-05
Opn3	2.31626	5e-05
Kif20b	2.31801	5e-05
Pmf1	2.31897	5e-05
Eno1	2.32648	5e-05
Grn	2.32791	5e-05
Slc39a8	2.333	5e-05
Egr1	2.3396	5e-05
Hmgcs1	2.34267	5e-05
Snx8	2.35005	5e-05
Prdm5	2.35421	0.0017
Zfp41	2.35604	5e-05
Slc7a5	2.35828	5e-05
Plcg2	2.35833	5e-05
Wdhd1	2.35879	5e-05
Pycr1	2.35889	5e-05
Ikbip	2.36013	5e-05
Foxred2	2.36199	5e-05
Pkn3	2.36246	5e-05
Lzts1	2.36443	5e-05
Dynlt1a	2.36805	5e-05
B4galt5	2.3681	5e-05
Klrg1	2.37269	0.00565
Gm8817	2.3759	5e-05
6720489N17Rik	2.3773	5e-05
Itga2	2.37763	5e-05
Syngr1	2.38149	5e-05
Serf1	2.38635	5e-05
Dnase2a	2.38877	5e-05
Pkm2	2.39076	5e-05
Bik	2.39096	5e-05
Dclre1a	2.39703	5e-05
Gfod1	2.39802	5e-05
Pcyt1a	2.39815	5e-05
Tfdp1	2.39873	5e-05
Cpped1	2.3995	5e-05
Gm5465	2.40225	5e-05
Rcc1	2.40547	5e-05
Serhl	2.40757	5e-05
Cisd1	2.40772	5e-05
Ccdc123	2.40954	5e-05
BC022687	2.41016	5e-05
Tmem67	2.41126	5e-05
Cenpl	2.41692	5e-05
4930520O04Rik	2.41826	5e-05
1700017B05Rik	2.41956	5e-05
Trib3	2.42598	5e-05
Gpr160	2.43112	5e-05
Dctpp1	2.43453	5e-05
5830418P13Rik	2.43456	0.0008
Aph1b	2.4363	5e-05
Cxcr6	2.43632	5e-05
Apip	2.43834	5e-05
Cldn25	2.44155	5e-05
Slc15a3	2.44314	0.00045
Hesx1	2.44424	0.00495
Ccl5	2.44446	5e-05
6720401G13Rik	2.44524	5e-05
Igsf10	2.44547	5e-05
Etfb	2.44826	5e-05
Hmgn2	2.45049	5e-05
Pdss1	2.45409	5e-05
Dok4	2.45491	5e-05
4930525D18Rik	2.45583	0.0003
AW555464	2.45645	5e-05
Dhdh	2.46086	5e-05
Gnaq	2.46877	5e-05
Eea1	2.46907	5e-05
Prim2	2.46909	5e-05
Dbn1	2.4703	0.0001
Rnaseh2b	2.4749	5e-05
Siva1	2.47603	5e-05
Prim1	2.47933	5e-05
Gm13375	2.48042	5e-05
Irf5	2.48279	5e-05
Mlf1ip	2.48297	5e-05
Xcl1	2.48307	5e-05
Phf11	2.48518	5e-05
Lamb3	2.48773	5e-05
Mms22l	2.49037	5e-05
Aldoa	2.49076	5e-05
Orc6	2.49089	5e-05
Atp10a	2.49115	5e-05
Rilpl2	2.49659	5e-05
2210411K11Rik	2.49834	5e-05
Mcm3	2.5006	5e-05
Dip2a	2.50157	5e-05
Cnrip1	2.50258	5e-05
Tnfrsf21	2.50602	5e-05
Gsto1	2.50781	5e-05
Aplp1	2.51014	5e-05
1700048O20Rik	2.51268	5e-05
Isg20	2.5157	5e-05
Med12l	2.5193	5e-05
Suv39h2	2.5287	5e-05
Naip2	2.53057	5e-05
Serpinb1a	2.53373	5e-05
Ccne1	2.53691	5e-05
Blm	2.53713	5e-05
Jazf1	2.53961	5e-05
Fbxo48	2.54212	5e-05
Nup37	2.54635	5e-05
Ccbl2	2.55323	5e-05
Pex11c	2.55618	5e-05
Cd160	2.55738	5e-05
Slfn9	2.56234	5e-05
C8g	2.56281	5e-05
Cobll1	2.56399	5e-05
Eid3	2.57131	0.0001
Atp8b4	2.57333	5e-05
Abcb10	2.57645	5e-05
Rnf216	2.57787	5e-05
Sv2c	2.58068	5e-05
Wdr62	2.58434	5e-05
Aqp9	2.58591	5e-05
Fam129a	2.58695	5e-05
Fcer1g	2.58835	5e-05
Myo5a	2.60214	5e-05
Cd63	2.6072	0.0001
Bcl2l1	2.61002	5e-05
Nrn1	2.61189	5e-05
Lrp11	2.61397	5e-05
Bmpr1a	2.61486	5e-05
Tom1l1	2.61574	5e-05
1700086O06Rik	2.61692	0.0001
Angptl4	2.62274	5e-05
Gm13546	2.6228	5e-05
Lsr	2.62458	5e-05
Coq7	2.63016	5e-05
2010300C02Rik	2.63347	5e-05
Ptger2	2.63379	5e-05
Id2	2.63398	5e-05
Unc119	2.63485	5e-05
Fdps	2.6353	5e-05
1810055G02Rik	2.63923	5e-05
Cryz	2.6479	5e-05
Kifc5b	2.65107	5e-05
Galk1	2.65226	5e-05
Lmna	2.6537	5e-05
Cercam	2.65403	5e-05
Camk2n2	2.65738	5e-05
Mtbp	2.65872	5e-05
Ttc16	2.661	5e-05
4930509E16Rik	2.66221	5e-05
Rilpl1	2.66564	5e-05
Tuba1c	2.66572	5e-05
Chaf1b	2.66921	5e-05
Rfc3	2.66984	5e-05
Paqr4	2.67118	5e-05
Sdcbp2	2.67455	5e-05
Pbx3	2.6783	5e-05
9030625A04Rik	2.68218	0.00015
Pgam1	2.68511	5e-05
Slc35e4	2.69125	5e-05
Nt5dc2	2.69206	5e-05
Hist1h4c	2.69314	0.01225
Fkbp5	2.69562	5e-05
Gm12070	2.69633	5e-05
Ptgs1	2.69961	5e-05
Siah1b	2.70147	5e-05
Nudt2	2.70149	5e-05
Smc2	2.70498	5e-05
Rd3	2.70948	5e-05
Ifi204	2.71921	5e-05
Cpne2	2.71989	5e-05
Brca2	2.72003	5e-05
Rbm44	2.72739	5e-05
Akr1e1	2.72767	5e-05
Gen1	2.73084	5e-05
Klra3	2.7317	0.0012
Cdca7	2.73409	5e-05
Rfc4	2.73409	5e-05
Myo1f	2.73552	5e-05
Gca	2.73671	5e-05
Gpnmb	2.74521	5e-05
Rnf208	2.74571	0.0021
Cchcr1	2.74729	5e-05
Fbxo5	2.74759	5e-05
Acadl	2.7479	5e-05
BC018242	2.7482	5e-05
Adam15	2.74941	5e-05
Agpat9	2.75014	5e-05
Scd1	2.75324	5e-05
Tmprss3	2.75871	5e-05
Impa2	2.76541	5e-05
Pilrb2	2.76638	5e-05
Lrp8	2.7674	5e-05
Abhd4	2.7679	5e-05
Rps27l	2.76909	5e-05
Ikzf4	2.77161	5e-05
Nkd2	2.77705	5e-05
Dhcr24	2.7809	5e-05
Klre1	2.78573	5e-05
Tmem107	2.78848	5e-05
Cmtm7	2.79123	5e-05
Klhl23	2.79525	5e-05
Axl	2.79543	5e-05
Psmc3ip	2.80153	5e-05
Psat1	2.80224	5e-05
Hspa2	2.80518	5e-05
Gapdh	2.80587	5e-05
Tenc1	2.81261	5e-05
Mical2	2.81283	5e-05
Zfp473	2.81778	5e-05
Neb	2.82624	5e-05
4930506M07Rik	2.82765	5e-05
Slc39a4	2.82826	5e-05
9530077C05Rik	2.83783	5e-05
Nlgn2	2.84064	5e-05
Stx11	2.84264	5e-05
Fen1	2.84289	5e-05
Fhl2	2.84787	5e-05
Il2rb	2.85301	5e-05
Slc17a7	2.85423	5e-05
9330159M07Rik	2.85526	0.0001
3110082I17Rik	2.86202	5e-05
Ogfrl1	2.87654	5e-05
Ercc6l	2.88015	5e-05
Plxdc1	2.88319	5e-05
Mtap9	2.88398	5e-05
Hgfac	2.88691	0.0003
Sowahc	2.89582	5e-05
Arhgap21	2.89639	5e-05
Odc1	2.90554	5e-05
Klrb1c	2.90658	5e-05
Pola1	2.91162	5e-05
Ccr4	2.91809	5e-05
Myl10	2.92398	5e-05
Sytl2	2.92589	5e-05
Ier3	2.92652	5e-05
Srgap3	2.92817	5e-05
BC055324	2.92871	5e-05
B3galt5	2.93223	5e-05
Bcam	2.9354	5e-05
Ctnna1	2.93673	5e-05
Vim	2.93694	5e-05
Spats2	2.9389	5e-05
Cldn12	2.94028	5e-05
Syngr4	2.94335	0.0091
Ccno	2.94607	5e-05
Ptpn13	2.94833	5e-05
2210403K04Rik	2.95058	5e-05
1110046J04Rik	2.96083	0.0055
Ppfibp1	2.96213	5e-05
Fbxw8	2.96648	5e-05
Hist2h2ac	2.96819	0.00675
8430427H17Rik	2.98254	5e-05
Slc1a4	2.993	5e-05
Fam164a	2.99638	5e-05
Zfyve28	2.9992	5e-05
Slc25a24	3.00121	5e-05
Itgb5	3.0016	5e-05
Popdc2	3.00178	5e-05
Vill	3.0018	5e-05
Atad5	3.00226	5e-05
Repin1	3.00826	5e-05
Ccdc112	3.01101	5e-05
Gpt2	3.01224	5e-05
Kank3	3.01579	5e-05
Plp2	3.01709	5e-05
Myo10	3.01828	5e-05
Rtn2	3.01951	0.00545
Lix1l	3.02991	5e-05
Wdr60	3.03719	5e-05
Rem2	3.03821	0.0098
Mcm5	3.03919	5e-05
Pcdhgc3	3.04244	5e-05
4930427A07Rik	3.05138	5e-05
Pls3	3.05369	5e-05
Ezh2	3.05535	5e-05
2700099C18Rik	3.0563	5e-05
Hipk4	3.06397	0.00135
Ccdc34	3.06876	5e-05
Lpin3	3.07114	5e-05
Rgs1	3.07265	5e-05
4930431P03Rik	3.07281	5e-05
Rpl26	3.07705	5e-05
Hist1h2bg	3.07956	0.0098
Srl	3.08002	5e-05
2610021K21Rik	3.09181	5e-05
Chtf18	3.09197	5e-05
Fgd2	3.09979	5e-05
Hpgds	3.10123	5e-05
Tbc1d7	3.10143	5e-05
Ldlr	3.10251	5e-05
Idi1	3.10653	5e-05
Anxa9	3.10669	5e-05
Nek4	3.1077	5e-05
Ccrl2	3.10772	5e-05
Ropn1l	3.1117	0.0008
Hist1h4i	3.1139	5e-05
Morn2	3.11757	0.0013
Gm13293	3.11862	0.00695
Fam161a	3.12466	5e-05
Ndrg4	3.12817	5e-05
Slc35f5	3.12876	5e-05
Casp1	3.13304	5e-05
Kif18a	3.13701	5e-05
Spata24	3.14478	5e-05
Shmt1	3.14923	5e-05
Brip1	3.15833	5e-05
Cpa3	3.16135	0.00085
Acot11	3.1678	5e-05
B230217C12Rik	3.17163	0.00085
Polq	3.18672	5e-05
Cyp51	3.18805	5e-05
Cks2	3.18829	5e-05
Ncapd2	3.20031	5e-05
Ptms	3.20256	5e-05
St6galnac2	3.20697	5e-05
Pgk1	3.20999	5e-05
Cxcr3	3.2118	5e-05
Kmo	3.21252	5e-05
Alox8	3.21469	5e-05
Nrbp2	3.21852	5e-05
Otos	3.22142	5e-05
Tipin	3.22347	5e-05
Ehd4	3.22747	5e-05
Sdf2l1	3.23347	5e-05
Atpif1	3.23719	5e-05
Pxmp2	3.24151	5e-05
Tmem37	3.24219	5e-05
Dut	3.24504	5e-05
Txn1	3.24619	5e-05
Glis2	3.24694	5e-05
Foxp3	3.25141	5e-05
4632434I11Rik	3.25345	5e-05
Rasl11a	3.25407	0.006
Mocos	3.25768	5e-05
Tube1	3.25957	5e-05
Pole	3.26149	5e-05
Rasd1	3.26212	0.00015
Tcf19	3.26217	5e-05
Bcl2a1b	3.26932	5e-05
Fam132b	3.27289	5e-05
Zfp768	3.27408	5e-05
Rbpj	3.28107	5e-05
Gpr137b	3.28118	0.0007
Cdkn2c	3.28379	5e-05
Fanci	3.28572	5e-05
Nr4a2	3.28902	5e-05
Ppm1j	3.29479	5e-05
Cd38	3.29512	5e-05
Lmnb1	3.29921	5e-05
D2Ertd750e	3.30632	5e-05
Tgm1	3.30942	5e-05
Swap70	3.31598	5e-05
Pwwp2b	3.31888	5e-05
Poc1a	3.31981	5e-05
2010107G23Rik	3.32541	0.00385
Tmem40	3.33241	5e-05
Plk4	3.33805	5e-05
Arhgap33	3.33864	5e-05
Ly6g5b	3.34515	5e-05
Kctd14	3.35562	5e-05
Trim36	3.35956	5e-05
Ctnnbip1	3.36167	5e-05
Rassf6	3.36522	0.0007
Tmem25	3.3671	0.00015
Vsig10	3.36789	5e-05
Ston2	3.36802	5e-05
Kctd17	3.37491	5e-05
Kcnk6	3.3766	5e-05
Slc52a3	3.38092	5e-05
Pcx	3.38546	5e-05
Asph	3.41138	5e-05
Cmklr1	3.41237	0.0006
B4galnt2	3.41435	5e-05
Fam78b	3.41982	5e-05
Irf4	3.42222	5e-05
Gas2l1	3.42558	5e-05
Exoc3l	3.42564	5e-05
Scd2	3.43815	5e-05
Incenp	3.44531	5e-05
Plekhg3	3.44865	5e-05
Ly6c1	3.44866	5e-05
Fam72a	3.45113	5e-05
Ccdc40	3.4538	5e-05
Kcnk7	3.45567	0.0001
Hemk1	3.45665	5e-05
Ccdc99	3.46489	5e-05
Mcm8	3.46681	5e-05
Dcbld2	3.47137	5e-05
Gadd45g	3.47507	5e-05
Irf8	3.47721	5e-05
Dab2ip	3.48234	5e-05
Fanca	3.48666	5e-05
Pros1	3.49231	5e-05
Sord	3.49537	5e-05
Igf2bp3	3.50279	5e-05
Ly6a	3.52689	5e-05
Gas2	3.5274	5e-05
Ndc80	3.53066	5e-05
Rsph9	3.53098	0.00065
Spata7	3.53253	5e-05
Srcrb4d	3.53332	5e-05
Pkig	3.54181	5e-05
Dusp5	3.54657	5e-05
E2f1	3.54841	5e-05
Sdc1	3.55596	5e-05
Il12rb1	3.56057	5e-05
Fbxo44	3.56561	5e-05
Npdc1	3.5671	5e-05
Smyd1	3.5679	5e-05
Mybl1	3.56805	5e-05
5430427O19Rik	3.56896	5e-05
St6galnac6	3.57748	5e-05
Itih5	3.57795	5e-05
Slc9a5	3.58665	5e-05
Vegfa	3.58923	5e-05
Mad2l1	3.58945	5e-05
Kif24	3.58958	5e-05
Fnip2	3.59292	5e-05
Serpinb6a	3.60135	5e-05
Tspan4	3.60208	5e-05
Whsc1	3.61096	5e-05
Ier5l	3.62646	5e-05
4930583H14Rik	3.62669	5e-05
Arl11	3.62857	0.0047
Nlrp3	3.62954	0.0003
Nid2	3.63145	0.00015
Acot7	3.63269	5e-05
Cenpa	3.63789	5e-05
Phactr2	3.63867	5e-05
Ppap2c	3.6397	5e-05
Cox7a1	3.63998	0.0047
Wee1	3.64395	5e-05
Ppp2r3a	3.65184	5e-05
Adarb1	3.6566	5e-05
Atp6v0a1	3.66611	5e-05
Runx2	3.66625	5e-05
Kpna2	3.67054	5e-05
4833419F23Rik	3.67176	5e-05
E2f2	3.67455	5e-05
Casp4	3.67479	5e-05
F2rl2	3.67818	5e-05
Rrm1	3.67895	5e-05
Cdkl2	3.68041	5e-05
Serpina3g	3.68408	5e-05
Nhedc2	3.68881	0.0003
Tspan17	3.69108	0.0032
Bahcc1	3.69347	5e-05
4930486L24Rik	3.70166	5e-05
Csda	3.70405	5e-05
Rhoc	3.7065	5e-05
Palm	3.70947	5e-05
C030034L19Rik	3.71096	5e-05
Hpdl	3.71726	5e-05
Xcr1	3.71763	5e-05
Ston1	3.72346	0.0032
Nrp1	3.73186	5e-05
Pls1	3.73466	0.0001
Atxn7l1	3.73718	5e-05
Itsn1	3.7405	5e-05
1110032F04Rik	3.74389	5e-05
Akr1c12	3.7454	5e-05
Tyms	3.7571	5e-05
Il17rd	3.76008	5e-05
Syngr3	3.76222	0.0003
Ccdc18	3.76927	5e-05
Slc9a3r2	3.77295	0.00085
Bard1	3.78028	5e-05
Pcdhgc4	3.78365	0.0029
1110067D22Rik	3.78423	5e-05
Zfp941	3.78585	0.00035
Bzrap1	3.78765	5e-05
Cyfip1	3.79026	5e-05
Dhfr	3.79873	5e-05
Nfe2	3.80254	5e-05
Klrc2	3.8094	5e-05
Nqo1	3.82268	5e-05
Kcnab3	3.82745	5e-05
Cabp1	3.82766	0.0026
Sccpdh	3.83109	5e-05
Pter	3.83401	5e-05
Extl1	3.83583	5e-05
Arhgap11a	3.83697	5e-05
Asf1b	3.86201	5e-05
Glrx	3.86225	5e-05
Tmem97	3.86275	5e-05
Kdm4d	3.86744	0.00285
Gabarapl1	3.87669	5e-05
B9d1	3.87981	0.0004
2013-09-05	3.89499	0.0085
Oscp1	3.9001	5e-05
Il18rap	3.90636	5e-05
Slc29a4	3.90667	0.0004
Stau2	3.91226	0.0098
Pygl	3.91378	5e-05
Ephx4	3.92976	0.0026
Sqle	3.93122	5e-05
Camk2n1	3.93242	5e-05
Recql4	3.9351	5e-05
1700020L24Rik	3.93665	5e-05
St3gal2	3.94843	5e-05
Gpr34	3.94923	5e-05
Pex11a	3.95142	0.00285
Kifc1	3.95505	5e-05
Ankrd29	3.95945	5e-05
Mx1	3.97258	5e-05
Matn2	3.97372	0.0003
Dgkh	3.97685	5e-05
Rad51l1	3.97799	5e-05
Arap3	3.98387	5e-05
Lig1	3.98655	5e-05
Stk39	4.00319	5e-05
Igfbp6	4.00683	0.00255
Dscc1	4.02721	5e-05
Tbx21	4.03136	5e-05
Optn	4.03597	5e-05
Il18	4.03785	5e-05
Car5b	4.03914	5e-05
Anxa4	4.04088	5e-05
Naip6	4.04187	0.0003
Hells	4.04534	5e-05
Spry1	4.05383	5e-05
Nfil3	4.05633	5e-05
Arl6	4.05935	5e-05
Nmral1	4.07985	5e-05
Adcy5	4.08107	0.0001
Tmbim1	4.08137	5e-05
Sema7a	4.08383	5e-05
Ly6i	4.09047	5e-05
Traip	4.09662	5e-05
E130303B06Rik	4.09795	5e-05
Brca1	4.1139	5e-05
Plekhg4	4.1144	5e-05
Hmgb2	4.11481	5e-05
Apitd1	4.12208	5e-05
BC068157	4.13195	5e-05
2900026A02Rik	4.14073	5e-05
Tmem2	4.14632	5e-05
Tnfsf13b	4.14698	5e-05
Rnf128	4.14778	5e-05
Fkbp11	4.1546	0.0001
2610318N02Rik	4.15921	5e-05
Cenpw	4.1614	5e-05
E130306D19Rik	4.16218	5e-05
Foxm1	4.17862	5e-05
Gins1	4.17959	5e-05
Etv4	4.18142	0.0026
Capg	4.18903	5e-05
Dpep2	4.19059	0.0026
Ncald	4.19357	5e-05
1190002F15Rik	4.1976	5e-05
Gmnn	4.21009	5e-05
Nhsl2	4.21266	5e-05
Nsl1	4.21766	5e-05
2900041M22Rik	4.23128	5e-05
Shisa2	4.23812	5e-05
Plekhf1	4.24231	5e-05
Eme1	4.24889	5e-05
Gcnt2	4.25127	5e-05
Rab39b	4.25214	0.0026
Cdh1	4.27037	5e-05
Tctex1d2	4.27085	5e-05
Pdcd1lg2	4.27748	5e-05
Tnp2	4.29192	5e-05
Zwilch	4.2925	5e-05
Slc22a15	4.30355	5e-05
Diap3	4.30633	5e-05
Asb2	4.31882	5e-05
Jdp2	4.33409	5e-05
Prkcc	4.33734	0.0026
Rpph1	4.33835	5e-05
Myl6b	4.34147	0.0001
Ect2	4.35922	5e-05
Prdx4	4.36265	5e-05
Tex15	4.37143	5e-05
Phf19	4.37911	5e-05
Vdr	4.3981	0.0001
Card10	4.40083	5e-05
Pon3	4.40169	5e-05
Npnt	4.41019	0.0001
Aldoc	4.42199	5e-05
Atf3	4.42544	0.0026
Lrfn4	4.44161	5e-05
2410022L05Rik	4.44273	0.0001
Cdca2	4.44481	5e-05
Cenpn	4.44924	5e-05
Arhgdig	4.46078	5e-05
Fam69b	4.46348	5e-05
Tpi1	4.4648	5e-05
Hdhd3	4.48039	0.0026
Bco2	4.48166	0.0026
Il12rb2	4.48217	5e-05
Inppl1	4.48406	5e-05
Stc2	4.49582	5e-05
Pcgf2	4.4988	5e-05
4831426I19Rik	4.51266	5e-05
C1qtnf6	4.51391	5e-05
Sema6b	4.516	5e-05
Pask	4.52676	5e-05
Dcxr	4.52944	5e-05
Kif5a	4.53202	5e-05
Cyb561	4.54006	5e-05
Myo1e	4.54119	5e-05
Nphp1	4.54159	5e-05
Casp3	4.546	5e-05
Klrk1	4.58405	5e-05
Siglec5	4.59112	0.0026
Tacc3	4.59263	5e-05
B230120H23Rik	4.60457	5e-05
Ogdhl	4.61375	0.0026
Atg9b	4.63	5e-05
Tmem180	4.63672	5e-05
Ccdc57	4.63885	0.0026
2010002N04Rik	4.64356	5e-05
Chek1	4.64356	5e-05
Arhgap19	4.64466	5e-05
Slamf7	4.65383	5e-05
Pnp2	4.65601	0.0026
Cpd	4.65854	5e-05
Hmgb3	4.68059	5e-05
Sh2d5	4.6857	5e-05
Plxdc2	4.69822	5e-05
Echdc2	4.70178	5e-05
Kif22	4.70965	5e-05
Stmn1	4.7218	5e-05
Ccr1	4.72434	5e-05
Endod1	4.73155	5e-05
Uhrf1	4.73634	5e-05
Smpdl3b	4.74019	5e-05
Rapgef3	4.75224	5e-05
Lmtk3	4.75823	5e-05
Myl4	4.76728	5e-05
Ncaph	4.76731	5e-05
Cass4	4.77692	5e-05
Spc25	4.78108	5e-05
Ddn	4.79165	5e-05
Tmem159	4.79524	5e-05
Cish	4.80598	5e-05
Cdc45	4.81174	5e-05
Phlda3	4.81427	5e-05
Hpse	4.81538	5e-05
Fam19a3	4.82269	5e-05
Mrgpre	4.82612	5e-05
Cela1	4.82929	0.0026
Rad54b	4.83173	5e-05
Pacsin3	4.83441	0.00025
Ppap2a	4.83588	0.0002
D430020J02Rik	4.8406	5e-05
6430571L13Rik	4.84143	5e-05
Chrm4	4.84158	5e-05
Tg	4.84983	5e-05
Dna2	4.86042	5e-05
Kdelc2	4.86049	5e-05
Irak1bp1	4.86177	5e-05
Slc24a3	4.86707	0.00065
Ckap2	4.87272	5e-05
Napsa	4.88189	5e-05
Naaladl1	4.8833	0.0026
Mfsd2a	4.88839	5e-05
Gpr15	4.89074	5e-05
Ell2	4.89316	5e-05
Cenph	4.89962	5e-05
Raph1	4.90271	5e-05
C330027C09Rik	4.91013	5e-05
Pik3ap1	4.91074	5e-05
Cenpi	4.91561	5e-05
Syce2	4.93011	5e-05
Gm14005	4.93533	5e-05
Coro2a	4.93803	5e-05
Capn5	4.93815	5e-05
Fabp5	4.9392	5e-05
Csrp2	4.94754	5e-05
Aurka	4.95065	5e-05
D10Bwg1379e	4.95772	5e-05
Hist1h2ag	4.9612	0.0026
Flywch2	4.96928	0.0026
Prnp	4.9729	5e-05
P2ry12	4.97511	0.0004
Car13	4.98176	0.0001
B430319G15Rik	4.9914	0.0126
Svip	4.99956	0.00025
Dlgap5	4.99988	5e-05
Osgin1	4.99996	5e-05
Plekhh3	5.0121	0.0026
4930428O21Rik	5.02707	0.0026
Farp1	5.04019	5e-05
Cks1b	5.04161	5e-05
Tspan2	5.04342	5e-05
Cdc20	5.04357	5e-05
Mybl2	5.04769	5e-05
Plek	5.05152	5e-05
Gins2	5.0542	5e-05
Ltk	5.05549	5e-05
Lilrb4	5.06478	5e-05
Ankle1	5.07114	5e-05
Zcchc14	5.07834	5e-05
Cenpk	5.07859	5e-05
Ak4	5.10114	5e-05
Mdfic	5.11304	5e-05
S100a1	5.11605	5e-05
Lancl3	5.12077	0.0026
Alpk2	5.1271	5e-05
Exo1	5.13164	5e-05
Cd93	5.15445	5e-05
Ctla2a	5.16688	5e-05
Fancd2	5.17277	5e-05
Fut7	5.17628	5e-05
Itpripl2	5.17853	5e-05
Hk2	5.1796	5e-05
Sema4c	5.18666	0.0001
Tjp2	5.19238	5e-05
Cd36	5.19425	5e-05
Soat2	5.20477	5e-05
Anubl1	5.20961	5e-05
Plod2	5.21816	5e-05
Bst1	5.21991	0.0026
Hcn2	5.23087	0.01115
Rad51ap1	5.24063	5e-05
Neurl1b	5.2457	5e-05
Pkd2	5.25541	0.0026
Xkr5	5.26217	5e-05
Tnfsf11	5.26385	5e-05
Prelid2	5.26417	5e-05
Slc43a3	5.26501	5e-05
Nav1	5.26904	5e-05
Slco4a1	5.26989	5e-05
Ptgr1	5.29586	5e-05
Aifm2	5.30414	0.00335
Tubb6	5.31478	5e-05
Fam54a	5.31486	5e-05
Lat2	5.32402	5e-05
Hic1	5.35107	5e-05
Hist1h2ae	5.35895	0.0026
Csf1	5.36407	5e-05
Ccne2	5.36759	5e-05
Cit	5.37624	5e-05
Lrrk1	5.38094	5e-05
Osbpl1a	5.41504	5e-05
Bnip3	5.41651	5e-05
Cdca8	5.42739	5e-05
Gzmk	5.43861	5e-05
Yap1	5.44056	0.0097
Gtse1	5.44098	5e-05
Cenpm	5.44428	5e-05
Mis18bp1	5.47013	5e-05
Atp2b4	5.47321	5e-05
Ltbp4	5.47551	5e-05
Ptprj	5.47715	5e-05
Myadm	5.47769	5e-05
Tnip3	5.47782	0.0026
5730590G19Rik	5.48638	5e-05
Spire1	5.49366	5e-05
Anln	5.50463	5e-05
Litaf	5.50991	5e-05
Cenpp	5.51043	5e-05
Mcf2l	5.55275	0.0027
Chaf1a	5.57296	5e-05
Lamc1	5.57448	5e-05
1700025K23Rik	5.5862	0.0026
Prdm1	5.59159	5e-05
Dusp4	5.59932	5e-05
Egfl7	5.61488	5e-05
Ccnf	5.62174	5e-05
Oip5	5.63988	5e-05
Hmmr	5.64571	5e-05
Sult2b1	5.65091	5e-05
Krt18	5.65316	0.0026
Gpr55	5.66875	5e-05
Plk1	5.70587	5e-05
Morn4	5.71234	0.0026
Dlg2	5.7141	0.0002
Cdk14	5.72246	0.0001
Dusp3	5.73309	5e-05
Fignl1	5.75104	5e-05
Smtn	5.7568	5e-05
Gipc3	5.76241	0.0026
Cdc6	5.76578	5e-05
Pde4a	5.77295	5e-05
Clspn	5.7732	5e-05
Anxa2	5.79104	5e-05
Spc24	5.79471	5e-05
Top2a	5.8004	5e-05
Nrgn	5.80756	5e-05
Kntc1	5.80816	5e-05
Cdca5	5.81108	5e-05
Rgs18	5.82392	0.0001
Sgol2	5.82746	5e-05
Kif20a	5.82772	5e-05
Dtl	5.86441	5e-05
Psrc1	5.87483	5e-05
Prc1	5.89148	5e-05
Lgals1	5.90707	5e-05
H1f0	5.91086	5e-05
Mnd1	5.91414	0.0026
Tbc1d2	5.92017	5e-05
Prr5l	5.92142	5e-05
Gcnt1	5.95471	5e-05
Cetn4	5.95569	0.0026
2810030E01Rik	5.96549	0.0026
Fam83d	5.97502	5e-05
Cenpe	5.98043	5e-05
Casc5	5.98089	5e-05
Dusp9	5.98572	0.0026
Pak6	5.9958	5e-05
Zbtb7b	6.00752	5e-05
Gp49a	6.01776	5e-05
Oit3	6.02052	0.0001
Fsbp	6.02694	0.01275
F630043A04Rik	6.03873	5e-05
Gstt3	6.07683	5e-05
Trip13	6.08278	5e-05
Alcam	6.09527	5e-05
Ncapg2	6.10254	5e-05
Nuf2	6.11033	5e-05
Aoah	6.11107	0.0026
2013-03-08	6.12362	5e-05
Orc1	6.1338	5e-05
Bcl2a1d	6.13476	5e-05
Vash1	6.14502	5e-05
Mastl	6.14966	5e-05
Tnfrsf9	6.16315	5e-05
Spry2	6.1821	5e-05
BC048355	6.1866	5e-05
Lrr1	6.2126	5e-05
Gpr56	6.23019	5e-05
Rad51	6.25196	5e-05
2810442I21Rik	6.25218	0.0026
Cdca3	6.25418	5e-05
Gatm	6.26555	5e-05
Mxd3	6.27534	5e-05
Rad54l	6.27862	5e-05
Klri2	6.29407	5e-05
Sgol1	6.32949	5e-05
Slc16a3	6.33999	5e-05
Crmp1	6.34116	5e-05
Entpd1	6.34689	5e-05
Arhgef25	6.35151	0.0001
B4galnt4	6.35336	5e-05
Ccl4	6.35911	5e-05
Dmwd	6.36499	5e-05
Ccna2	6.39691	5e-05
Clec12a	6.4043	5e-05
Kcnk5	6.40463	5e-05
Rab27b	6.40827	5e-05
Csgalnact1	6.43359	5e-05
Gas2l3	6.44039	5e-05
Hemgn	6.44717	0.0026
Adap1	6.45621	5e-05
Ckap2l	6.45671	5e-05
Nkain1	6.46337	0.0001
Dapk2	6.46687	5e-05
Klhl30	6.48526	0.0026
Prr11	6.49231	5e-05
Kif4	6.50672	5e-05
Itga1	6.51639	5e-05
Ltbp3	6.52228	0.03845
Mlkl	6.5428	5e-05
Plscr1	6.57569	5e-05
Ctla2b	6.5795	5e-05
Lrrc49	6.61681	0.0066
Neil3	6.62523	5e-05
Mki67	6.62644	5e-05
Cdkn3	6.62895	5e-05
Pilrb1	6.64332	0.0001
Tigit	6.65209	5e-05
Metrnl	6.66855	5e-05
Aspm	6.6794	5e-05
St14	6.68623	5e-05
Ncapg	6.68837	5e-05
Wdr54	6.69639	0.0026
2610002D18Rik	6.70969	5e-05
Adam8	6.71976	5e-05
Stil	6.72348	5e-05
D630039A03Rik	6.72589	5e-05
Dyrk3	6.73159	5e-05
Inha	6.73696	0.0026
Ifitm3	6.7479	5e-05
Tmem163	6.74976	5e-05
Kif11	6.75543	5e-05
Bub1b	6.76171	5e-05
Ccl3	6.76276	5e-05
Ccr5	6.76365	5e-05
Cenpf	6.76503	5e-05
E2f8	6.77939	5e-05
Gcat	6.79499	5e-05
Gls2	6.80225	0.0279
4930547N16Rik	6.831	5e-05
Plscr4	6.83828	0.0001
D630045J12Rik	6.83895	0.00155
Kif15	6.84814	5e-05
Nusap1	6.85621	5e-05
Ttk	6.85908	5e-05
Fgl2	6.88476	5e-05
Pcyt1b	6.89358	5e-05
Esco2	6.89537	5e-05
Rgs16	6.89678	5e-05
Sema6d	6.89787	5e-05
Melk	6.90548	5e-05
Prss16	6.90743	5e-05
Cep55	6.91762	5e-05
Tk1	6.93558	5e-05
Rrm2	6.94895	5e-05
Amotl1	6.96092	0.0026
Wnt10b	6.9908	5e-05
Ccnb2	6.99522	5e-05
Klrc1	7.01214	5e-05
Ebi3	7.04191	5e-05
Espl1	7.04388	5e-05
Troap	7.04638	5e-05
Cdc25c	7.04948	5e-05
Birc5	7.08483	5e-05
Hip1	7.09314	5e-05
Kif14	7.10014	5e-05
Mcm10	7.11969	5e-05
Ryk	7.12809	5e-05
Cdk1	7.13371	5e-05
Fut4	7.13469	5e-05
Endou	7.13769	5e-05
Prr5	7.15599	5e-05
9430020K01Rik	7.16397	0.0026
Bhlhe40	7.17164	5e-05
Fasl	7.17771	5e-05
2810417H13Rik	7.22627	5e-05
P2ry14	7.23845	5e-05
Emilin2	7.24678	5e-05
Tpx2	7.24694	5e-05
Dkkl1	7.24996	0.0001
Ube2c	7.26356	5e-05
Pbk	7.2847	5e-05
Actr3b	7.29403	5e-05
Iqgap3	7.30816	5e-05
Osbpl3	7.39722	5e-05
Kif18b	7.41601	5e-05
Specc1	7.41613	5e-05
Aurkb	7.43094	5e-05
Anxa1	7.47423	5e-05
Bub1	7.47588	5e-05
Trp73	7.50352	0.0012
E2f7	7.50366	5e-05
Batf3	7.51948	0.0026
Clnk	7.53551	0.0026
Depdc1a	7.54274	5e-05
Spag5	7.57324	5e-05
Zdhhc2	7.58386	5e-05
BC030867	7.63038	5e-05
Zbtb32	7.63436	5e-05
Shcbp1	7.7098	5e-05
Ifng	7.70981	5e-05
Lag3	7.78258	5e-05
Asns	7.80369	5e-05
Pif1	7.80524	5e-05
Ptpn3	7.81545	5e-05
Galnt3	7.83259	5e-05
Nek2	7.83422	5e-05
Upp1	7.85252	0.0082
P2ry13	7.87124	0.0004
Kif2c	7.90163	5e-05
Bcat1	7.90272	5e-05
Gpr141	7.90833	5e-05
Ctla4	7.93658	5e-05
Ltb4r1	7.93743	0.0026
Ccr2	7.94379	5e-05
1500009L16Rik	7.95166	5e-05
Ska1	8.00389	5e-05
Il1rl1	8.03078	5e-05
Serpine2	8.03369	5e-05
Ccnb1	8.0622	5e-05
Spp1	8.08141	0.0001
S100a6	8.16263	5e-05
Pik3r6	8.21667	0.0161
Bspry	8.24789	5e-05
Socs2	8.33429	5e-05
Cd244	8.33775	5e-05
Fam129b	8.38478	5e-05
Stk32c	8.393	0.0012
Pdcd1	8.3979	5e-05
Scin	8.42943	0.0005
Cables1	8.52691	5e-05
Lgals3	8.70404	5e-05
Ifitm2	8.70662	5e-05
2010317E24Rik	8.75175	0.0026
Emp1	8.7563	5e-05
Gucy2e	8.77762	0.0026
Il2ra	8.84466	5e-05
S100a4	8.87481	5e-05
Fam64a	8.92102	0.0001
Mpp2	9.08048	0.0026
AA467197	9.09367	5e-05
Cd80	9.16766	0.0026
Fam20a	9.18681	5e-05
Havcr2	9.33679	5e-05
Klra5	9.56448	5e-05
Ttc39c	9.58792	5e-05
Cdkn1a	10.3181	0.0009
Gzma	10.3351	5e-05
Mt1	10.6955	0.0026
Gzmc	11.3574	5e-05
Ifitm1	11.9812	5e-05

## Sheet: Nvs2
	2-fold change cut-off		Total genes: 1975
CuffDiff Analysis: Naïve vs Group 2
Gene	log2(fold_change)	p_value
Ccr9	-11.9256	0.0019
Il6ra	-10.7232	5e-05
Slc16a5	-9.92673	0.00265
Sh3pxd2a	-9.12587	5e-05
Sell	-8.92613	5e-05
Dtx1	-8.63003	5e-05
Ampd1	-8.33789	5e-05
Fam101b	-7.77073	5e-05
Vipr1	-7.53804	5e-05
Cd19	-7.39476	0.0383
Chst15	-7.29966	5e-05
Atp1b1	-7.27001	5e-05
Rgmb	-6.95603	5e-05
Itgae	-6.91349	5e-05
Cr2	-6.89152	0.0364
Cd22	-6.85743	0.00015
Kcnh3	-6.77752	0.0245
Igj	-6.53832	5e-05
Nhsl1	-6.5078	0.00055
Gprc5b	-6.18166	5e-05
Plekha6	-6.16922	5e-05
Cyp2d22	-6.15937	0.0002
Lbp	-6.15039	5e-05
Gria3	-6.03986	5e-05
Dntt	-5.99271	5e-05
5830411N06Rik	-5.9551	5e-05
Amigo2	-5.91781	5e-05
Kcna2	-5.91316	5e-05
Auts2	-5.89169	0.0306
She	-5.87184	0.00265
Rcn3	-5.84383	5e-05
Rasgrp3	-5.77451	0.03595
Cd79a	-5.76125	5e-05
Spib	-5.74293	0.00265
St6gal1	-5.73642	5e-05
Fcgrt	-5.69786	5e-05
Kcnj16	-5.64782	0.00095
Tspan9	-5.60459	5e-05
Igfbp4	-5.59167	5e-05
Ggt5	-5.5767	5e-05
Cd163l1	-5.57467	5e-05
Ksr2	-5.54375	0.00265
G0s2	-5.44197	5e-05
Trpm1	-5.39025	5e-05
Nfam1	-5.37964	5e-05
2310042E22Rik	-5.35099	5e-05
Ramp1	-5.31997	5e-05
Grm6	-5.29826	0.00265
Cnn3	-5.24979	5e-05
Gm4814	-5.2319	0.0292
Acvrl1	-5.21909	5e-05
Spsb1	-5.20796	5e-05
Ggt1	-5.19041	5e-05
Rnase6	-5.16138	0.00265
Cacna2d4	-5.08344	5e-05
Ampd3	-5.05278	5e-05
Camk2a	-5.02698	5e-05
H2-Ob	-5.02557	5e-05
Abca1	-5.01242	5e-05
Vcam1	-4.93634	0.00265
Zfp318	-4.92818	5e-05
Man1c1	-4.88285	0.00265
Timp2	-4.87146	5e-05
Angptl2	-4.84854	0.02415
Wnt5b	-4.81852	5e-05
C85492	-4.77974	0.00265
Pde2a	-4.77179	5e-05
Lrrc23	-4.771	5e-05
Galnt10	-4.73973	5e-05
Cd24a	-4.71295	5e-05
Sox4	-4.70677	5e-05
Tmem108	-4.65128	5e-05
Slc40a1	-4.64714	0.00265
2610019F03Rik	-4.6161	5e-05
Afap1	-4.6142	5e-05
Klf3	-4.58212	5e-05
Hs3st3b1	-4.56224	5e-05
1810006J02Rik	-4.51526	5e-05
Gm11346	-4.51401	5e-05
Glt8d2	-4.48561	0.00225
Jup	-4.47961	5e-05
Xkrx	-4.46411	5e-05
Klf2	-4.45738	5e-05
Blnk	-4.44612	0.00265
Cxxc5	-4.44426	5e-05
Wfikkn2	-4.43263	5e-05
Trib2	-4.43156	5e-05
Nacc2	-4.4053	5e-05
Kcnh2	-4.39201	5e-05
Gm128	-4.37197	5e-05
Zdhhc14	-4.35486	5e-05
Sox13	-4.32038	5e-05
Tmie	-4.25961	5e-05
Plaur	-4.25705	5e-05
BC057022	-4.24417	5e-05
Tcp11	-4.23773	5e-05
Adcy6	-4.20714	5e-05
Apobec2	-4.20656	0.00265
Dusp7	-4.20351	5e-05
Ldlrap1	-4.1897	5e-05
Adrb2	-4.17345	5e-05
Rgs10	-4.13563	5e-05
Plcb4	-4.13453	5e-05
Ttc28	-4.134	5e-05
AI646023	-4.13018	5e-05
C630004H02Rik	-4.12334	5e-05
Ltf	-4.11349	0.00265
Rasal1	-4.10814	5e-05
Slc16a10	-4.10535	5e-05
Gm10640	-4.10176	5e-05
Zfp2	-4.0839	5e-05
D930028M14Rik	-4.07571	5e-05
H2-Aa	-4.06088	5e-05
Chst3	-4.05892	5e-05
S1pr1	-4.03953	5e-05
Sipa1l2	-4.01478	5e-05
Rorc	-4.00086	5e-05
Lman1l	-3.99146	5e-05
Scg5	-3.98769	5e-05
Plbd1	-3.97611	0.00265
Sh3tc1	-3.96766	5e-05
Tle1	-3.95376	5e-05
Rarg	-3.92201	5e-05
Irf6	-3.89011	5e-05
Cacnb1	-3.88635	5e-05
Rnf144a	-3.8807	5e-05
Boll	-3.85546	5e-05
3830403N18Rik	-3.83244	5e-05
Actn1	-3.8197	5e-05
Spaca1	-3.81932	5e-05
Dock4	-3.78947	5e-05
Cnr2	-3.78941	5e-05
Faim3	-3.76038	5e-05
H2-Eb1	-3.75688	5e-05
Rftn2	-3.7546	5e-05
Tcf7l1	-3.74374	5e-05
D8Ertd82e	-3.73991	5e-05
Btk	-3.71135	5e-05
Nckap5l	-3.68487	5e-05
Tcp11l2	-3.68391	5e-05
Cxcr5	-3.65029	5e-05
Cd7	-3.63908	5e-05
Xylt1	-3.63418	5e-05
Rps6ka2	-3.62058	5e-05
C1qtnf9	-3.6161	0.0002
Rec8	-3.616	0.0002
Serpinf2	-3.60991	0.00395
Zscan18	-3.60966	5e-05
Shb	-3.60438	5e-05
Pacsin1	-3.59971	5e-05
Frat1	-3.58256	5e-05
Emid1	-3.57856	5e-05
Laptm4b	-3.55299	5e-05
Il6st	-3.55104	5e-05
Syde2	-3.54843	5e-05
S100a9	-3.54192	5e-05
Cd79b	-3.5269	5e-05
Dok3	-3.52683	5e-05
Gm15708	-3.51117	5e-05
Raver2	-3.49793	5e-05
Adamtsl4	-3.4852	5e-05
Slpi	-3.48042	5e-05
Prss12	-3.47807	5e-05
Arhgap29	-3.45518	5e-05
Mmp15	-3.42599	5e-05
Guca1b	-3.41971	5e-05
Rapgef4	-3.41827	5e-05
Celsr2	-3.4132	5e-05
Gm12505	-3.40917	5e-05
Sorcs2	-3.38453	5e-05
Hcn3	-3.35557	5e-05
Adh1	-3.35423	5e-05
Arhgef11	-3.35244	5e-05
2900005J15Rik	-3.35185	5e-05
Tsc22d3	-3.34517	5e-05
Mylip	-3.3446	5e-05
Als2cl	-3.33975	5e-05
Kcnc1	-3.33944	5e-05
Tcap	-3.31744	0.00395
Bambi-ps1	-3.31721	5e-05
Pik3c2b	-3.31594	5e-05
Slc25a2	-3.30906	0.03145
Fam117a	-3.30067	5e-05
Syde1	-3.29949	5e-05
4933430H15Rik	-3.28374	5e-05
Sidt1	-3.27167	5e-05
1700061G19Rik	-3.24503	0.00645
Sgk1	-3.24403	5e-05
4921525O09Rik	-3.23995	5e-05
Impg2	-3.2392	5e-05
Dirc2	-3.23599	5e-05
Ptpdc1	-3.21354	5e-05
Gm14085	-3.21186	5e-05
Gpr146	-3.2106	5e-05
Clcf1	-3.20398	5e-05
Nrp2	-3.19037	5e-05
Syk	-3.17506	5e-05
Cxcr4	-3.16932	5e-05
Nsg2	-3.16709	5e-05
As3mt	-3.15842	5e-05
Cd55	-3.15067	5e-05
Col11a2	-3.14346	5e-05
Pdk2	-3.14084	5e-05
Mex3a	-3.1314	5e-05
Sema4g	-3.12849	5e-05
Ralgps2	-3.11567	5e-05
F12	-3.11458	5e-05
Csrnp2	-3.10357	5e-05
Rbpms	-3.10244	5e-05
Begain	-3.09344	5e-05
Snn	-3.08523	5e-05
Csf3r	-3.07926	5e-05
Cyp2r1	-3.07633	5e-05
Slc27a6	-3.07197	5e-05
Dapl1	-3.06978	5e-05
Hist2h3c1	-3.06561	5e-05
Rtn4rl1	-3.06403	5e-05
Slc12a7	-3.06387	5e-05
Cmah	-3.05694	5e-05
Gm10638	-3.05317	0.002
Nr1d1	-3.02974	5e-05
Trio	-3.00945	5e-05
Zfp36	-2.99462	5e-05
Maged1	-2.98694	5e-05
Gramd4	-2.96773	5e-05
Zbtb10	-2.96596	5e-05
B630019K06Rik	-2.96284	5e-05
Prrt1	-2.96266	5e-05
Enc1	-2.95857	5e-05
Per2	-2.95264	5e-05
Peg13	-2.9505	5e-05
S100a8	-2.92827	5e-05
Olfr1033	-2.92256	5e-05
Nacad	-2.91645	5e-05
Snord35b	-2.91434	0.03475
Frat2	-2.91181	5e-05
Mia1	-2.90629	0.00655
Slc26a11	-2.89613	5e-05
B430306N03Rik	-2.88789	5e-05
Pyroxd2	-2.88762	5e-05
Zscan10	-2.88411	5e-05
Fry	-2.88127	5e-05
Ppp1r13b	-2.87771	5e-05
Pou2af1	-2.87002	5e-05
Dnajc6	-2.86899	5e-05
Stx1a	-2.86609	5e-05
Tlr9	-2.85822	5e-05
Prpf40b	-2.85821	5e-05
Aldh1l1	-2.8567	5e-05
Vmn2r97	-2.85562	5e-05
Smad7	-2.83543	5e-05
Sbf2	-2.83492	5e-05
2410066E13Rik	-2.83484	5e-05
Col23a1	-2.82262	5e-05
Kdm6b	-2.79111	5e-05
Sbk1	-2.78704	5e-05
Ssh2	-2.78628	5e-05
Bcl9l	-2.78467	5e-05
Ptk2	-2.78215	5e-05
Plcb2	-2.77842	5e-05
Mical3	-2.77498	5e-05
Lyl1	-2.77211	0.0019
Wdfy4	-2.76954	5e-05
Otud1	-2.76695	5e-05
Ephx1	-2.76257	5e-05
Hsd11b1	-2.76116	5e-05
Txk	-2.75513	5e-05
Slc6a19	-2.75192	5e-05
Fam65b	-2.73751	5e-05
1700102P08Rik	-2.73322	5e-05
Slc3a1	-2.72869	5e-05
Acvr1b	-2.72702	5e-05
Ctsk	-2.72075	0.0021
Zhx2	-2.71408	5e-05
Cpm	-2.71326	5e-05
Fos	-2.70982	5e-05
Rpl39l	-2.7074	0.00015
Fgd2	-2.70668	0.0001
Ggnbp1	-2.69783	5e-05
Efna2	-2.68624	0.00055
Fhit	-2.68282	0.0043
Ccr7	-2.67996	5e-05
Usp28	-2.67096	5e-05
Plekho1	-2.66235	5e-05
Epas1	-2.65652	5e-05
Arhgap5	-2.6542	5e-05
Nfix	-2.65401	5e-05
6330512M04Rik	-2.65358	5e-05
Atp13a2	-2.65198	5e-05
Cdr2l	-2.6518	5e-05
Btg1	-2.64852	5e-05
Axin2	-2.6446	5e-05
F2rl1	-2.63649	5e-05
Tbx6	-2.635	5e-05
Rreb1	-2.60847	5e-05
Xlr3b	-2.6079	5e-05
Itfg3	-2.60776	5e-05
Pdzd4	-2.59107	5e-05
Tnfrsf25	-2.58528	5e-05
App	-2.58484	5e-05
D17H6S56E-3	-2.5789	0.00015
Trim47	-2.57315	5e-05
Bsn	-2.56705	5e-05
Vmn2r96	-2.56618	5e-05
E130304F04Rik	-2.56433	5e-05
Rab4a	-2.563	5e-05
Phyhd1	-2.56287	5e-05
Rab20	-2.55355	5e-05
Slc25a29	-2.55231	5e-05
Nlrc4	-2.55008	5e-05
Cd302	-2.54508	0.0004
Lgmn	-2.54136	5e-05
Arl5c	-2.53493	5e-05
Ovgp1	-2.53088	5e-05
Zmynd10	-2.53005	5e-05
Dapk1	-2.52631	5e-05
Sp6	-2.52478	5e-05
Hsph1	-2.51897	5e-05
Sema4b	-2.51668	5e-05
Cnksr3	-2.51406	5e-05
Acer2	-2.51134	5e-05
Chrna2	-2.50974	5e-05
Rab3ip	-2.49691	5e-05
Gfod2	-2.49461	5e-05
Dusp10	-2.49347	5e-05
Dnajc28	-2.48586	5e-05
Dnajb2	-2.4845	5e-05
Tgfbr3	-2.48342	5e-05
Cd1d2	-2.48119	0.00055
BC065397	-2.47203	5e-05
Ifngr2	-2.46833	5e-05
Il11ra1	-2.46658	5e-05
Gm10818	-2.46643	0.00035
Elovl7	-2.46406	5e-05
2310042D19Rik	-2.45992	5e-05
Map3k9	-2.45552	5e-05
Akap2	-2.45515	5e-05
Ntrk3	-2.45196	5e-05
Rnf122	-2.45013	5e-05
A430088P11Rik	-2.44713	5e-05
Il1b	-2.44563	0.00855
Amz1	-2.44552	5e-05
Bend4	-2.44497	5e-05
Rarb	-2.44415	5e-05
Id3	-2.43899	5e-05
Afp	-2.43476	5e-05
Tdgf1	-2.43449	5e-05
Lef1	-2.41685	5e-05
Dcdc2b	-2.41598	5e-05
Pygm	-2.41447	5e-05
4930481A15Rik	-2.404	5e-05
Chad	-2.40118	0.0003
Mmp17	-2.39867	5e-05
4933432I09Rik	-2.39856	0.00725
Aqp3	-2.39828	5e-05
Tgfb1i1	-2.39588	5e-05
Mir3064	-2.37991	0.0065
Arhgap39	-2.36531	5e-05
Tagap	-2.36526	5e-05
Srsf12	-2.36403	5e-05
Abtb2	-2.35857	5e-05
Tmc3	-2.3533	5e-05
Nedd4l	-2.35314	5e-05
Slc25a27	-2.34448	5e-05
Plekha7	-2.34228	5e-05
Tubb3	-2.34045	5e-05
Hsd17b1	-2.33644	0.0047
Plekha1	-2.33274	5e-05
Atp10d	-2.33182	5e-05
Dcun1d4	-2.32904	5e-05
Sqrdl	-2.32861	5e-05
Bckdhb	-2.32617	5e-05
Plekhg2	-2.31413	5e-05
Timm8a2	-2.31409	0.0009
Btbd11	-2.31244	5e-05
Trat1	-2.31048	5e-05
Hs6st1	-2.31023	5e-05
Matk	-2.30534	5e-05
Ciita	-2.30304	5e-05
Mst1	-2.30269	5e-05
Cdh24	-2.29706	5e-05
Zfp773	-2.28947	5e-05
Lrrc8a	-2.28758	5e-05
Itga5	-2.28501	5e-05
Klhl4	-2.28464	5e-05
Gprasp1	-2.28423	5e-05
1190002H23Rik	-2.28175	5e-05
Jhdm1d	-2.28102	5e-05
Socs3	-2.27967	5e-05
Usp2	-2.2788	5e-05
Hmgn1	-2.27261	5e-05
Zbtb20	-2.27188	5e-05
Pik3ip1	-2.27068	5e-05
Snx30	-2.26794	5e-05
Tnfrsf12a	-2.26736	5e-05
Klhl24	-2.26569	5e-05
Znrf3	-2.26307	5e-05
Nr1d2	-2.26302	5e-05
Slc17a9	-2.26295	5e-05
Ccdc117	-2.26232	5e-05
Id1	-2.26232	0.0065
Hdac7	-2.25738	5e-05
Pltp	-2.25372	5e-05
Itga10	-2.24808	5e-05
Aldh6a1	-2.24655	5e-05
Art2b	-2.24218	5e-05
Pak1	-2.24202	5e-05
Fbxo10	-2.24119	5e-05
Galnt6	-2.23369	5e-05
Atg4c	-2.23235	0.0001
Lmo2	-2.2307	5e-05
Traf4	-2.22808	5e-05
Pam	-2.22573	5e-05
Vpreb1	-2.21864	0.0076
Unc5cl	-2.21584	5e-05
Rere	-2.21377	5e-05
Gm11944	-2.20956	0.0032
Hus1b	-2.19552	0.018
Cd74	-2.19373	5e-05
B930003M22Rik	-2.19294	5e-05
Steap3	-2.19245	5e-05
Ccdc114	-2.19207	5e-05
Stap2	-2.18609	5e-05
Mast4	-2.17773	5e-05
Camkk1	-2.17218	5e-05
AW011738	-2.17096	5e-05
Igf2bp2	-2.17019	5e-05
Plp1	-2.17019	5e-05
Rbm38	-2.16931	5e-05
Basp1	-2.16435	5e-05
Cnga1	-2.15467	5e-05
Tlr1	-2.15436	5e-05
Siah1a	-2.15265	5e-05
1810034E14Rik	-2.15124	5e-05
Txnrd3	-2.14848	5e-05
Sult1a1	-2.14763	0.00285
Bbc3	-2.14119	5e-05
A430078G23Rik	-2.14026	5e-05
Mdn1	-2.14017	5e-05
Vamp5	-2.13958	5e-05
Rasgrp2	-2.1328	5e-05
Nxnl1	-2.12845	5e-05
4931403E22Rik	-2.12634	0.0008
Slc5a3	-2.12326	5e-05
Kif1b	-2.1217	5e-05
Usp53	-2.11739	5e-05
Pag1	-2.11112	5e-05
Epb4.1l1	-2.10476	5e-05
Fgfrl1	-2.10432	5e-05
Arid3b	-2.10381	5e-05
Etv5	-2.10211	5e-05
Gli1	-2.10093	5e-05
Gm5176	-2.09905	0.0346
Zfp658	-2.09718	5e-05
Vamp1	-2.09437	5e-05
Sag	-2.09432	5e-05
Cd40	-2.09276	0.00155
Slc39a2	-2.0922	5e-05
Prr7	-2.08975	5e-05
Vps37b	-2.08935	5e-05
Pitpnm2	-2.08288	5e-05
Cd40lg	-2.08133	5e-05
Ctsl	-2.08023	5e-05
Hspa1b	-2.07869	5e-05
Dnahc17	-2.07737	5e-05
Tet1	-2.07661	5e-05
Fam110b	-2.07564	5e-05
Palm3	-2.07205	5e-05
Cdk5r1	-2.06788	5e-05
Prf1	-2.06624	5e-05
Arhgef18	-2.06565	5e-05
Zfp72	-2.06383	5e-05
Map4k5	-2.06361	5e-05
L3mbtl3	-2.06126	5e-05
Tacc2	-2.05898	5e-05
Dzip1	-2.05697	5e-05
Phf1	-2.05516	5e-05
Smad5	-2.05397	5e-05
Zfp831	-2.04956	5e-05
Neurl2	-2.04513	5e-05
Egfl8	-2.04443	5e-05
Emilin1	-2.04303	5e-05
Slc25a23	-2.03185	5e-05
Ikbke	-2.0294	5e-05
A930005H10Rik	-2.02744	5e-05
E030030I06Rik	-2.02287	5e-05
Macf1	-2.0135	5e-05
Vmn2r29	-2.01074	5e-05
Zfp661	-2.009	5e-05
Ahdc1	-2.00837	5e-05
Rsph1	2.00252	0.00115
Slc4a7	2.00268	5e-05
AW112010	2.00506	5e-05
Ldha	2.00511	5e-05
Pi4k2b	2.00554	5e-05
Hmgn2	2.00828	5e-05
Ier3	2.0153	5e-05
Gca	2.01605	5e-05
Zfp473	2.01685	5e-05
Cd300lf	2.0186	5e-05
Dhrs3	2.01911	5e-05
Cyp51	2.02512	5e-05
1810014F10Rik	2.0252	5e-05
6720489N17Rik	2.02972	5e-05
Nenf	2.0313	5e-05
Cpne2	2.03457	5e-05
Hif1a	2.03519	5e-05
Slc7a5	2.03646	5e-05
Prelid1	2.03763	5e-05
A730008H23Rik	2.04007	5e-05
Arid3a	2.04414	5e-05
Plxnb2	2.04614	5e-05
5330426P16Rik	2.04797	5e-05
Apln	2.05114	5e-05
Pmf1	2.05251	5e-05
Rilpl2	2.05385	5e-05
Tubb4a	2.05527	5e-05
Klf12	2.05788	5e-05
S100a11	2.05817	5e-05
4930534B04Rik	2.06131	5e-05
Wdr34	2.06366	5e-05
Fam92a	2.06636	5e-05
Olfr920	2.06887	0.00025
Pabpc1l	2.07217	5e-05
1700001L05Rik	2.07257	5e-05
Gng2	2.07349	5e-05
Orc6	2.07753	5e-05
Cobll1	2.07982	5e-05
Slc35e4	2.08307	5e-05
Neb	2.08449	5e-05
Tnni3	2.08725	0.0073
Ahr	2.10404	5e-05
Gem	2.10762	5e-05
Hpgds	2.10901	5e-05
Nqo2	2.11069	5e-05
Padi3	2.11518	5e-05
4930579G24Rik	2.11634	5e-05
Ms4a6d	2.11675	5e-05
Tfdp1	2.11788	5e-05
Chaf1b	2.11915	5e-05
Phlpp1	2.12073	5e-05
Nipa1	2.12259	5e-05
Pfkl	2.12262	5e-05
Pfkp	2.12476	5e-05
Dgat1	2.13549	5e-05
Mtap2	2.13669	5e-05
Chpt1	2.14108	5e-05
Hpdl	2.14192	0.00015
Pls3	2.14195	5e-05
Tspan3	2.14816	5e-05
Pex11c	2.1489	5e-05
Rnf216	2.14905	5e-05
Mms22l	2.15352	5e-05
Nt5dc2	2.15422	5e-05
Tmem176b	2.15762	5e-05
Rfc4	2.1614	5e-05
Ero1l	2.1615	5e-05
Gpr160	2.16197	5e-05
Gm5523	2.16205	0.00295
Rap2a	2.16261	5e-05
Ehd4	2.16746	5e-05
Wdpcp	2.16961	5e-05
Nudt2	2.17084	5e-05
Fam162a	2.17093	5e-05
Fam132a	2.17303	5e-05
Nlgn2	2.1756	5e-05
Tnfrsf18	2.17566	5e-05
Dsn1	2.18069	5e-05
Srd5a1	2.18159	5e-05
Lad1	2.18173	5e-05
Mlf1ip	2.18195	5e-05
Zfp939	2.18461	0.00055
Klhl23	2.18488	5e-05
Rbm3	2.18549	5e-05
Jub	2.19327	5e-05
Myo5a	2.19497	5e-05
Eif4e3	2.19941	5e-05
Phf11	2.20262	5e-05
Dnalc1	2.20387	5e-05
Otos	2.2058	0.0005
Pcbp4	2.21224	5e-05
C8g	2.2161	5e-05
Repin1	2.21662	5e-05
Zfp367	2.21774	5e-05
Slfn9	2.22203	5e-05
Grhpr	2.22408	5e-05
Ssx2ip	2.2273	5e-05
Gng3	2.22886	5e-05
Ercc6l	2.23148	5e-05
Dynlt1a	2.23338	5e-05
Rgs1	2.2365	5e-05
H2afx	2.23961	5e-05
Hist1h4i	2.24064	5e-05
Btbd8	2.24164	5e-05
Adssl1	2.2417	5e-05
Zfp768	2.24424	5e-05
Fhl2	2.24494	5e-05
Abcb10	2.24506	5e-05
Ccl6	2.24651	5e-05
Igf2bp3	2.24777	5e-05
Abi2	2.25062	5e-05
Prim2	2.25117	5e-05
Dclre1a	2.25224	5e-05
Ly6c2	2.26214	5e-05
Odc1	2.26216	5e-05
Mtbp	2.26695	5e-05
Gm13375	2.26712	5e-05
Dfna5	2.26791	5e-05
Cdca7	2.26873	5e-05
BC046404	2.27142	5e-05
Rd3	2.27499	5e-05
Prrg4	2.27659	5e-05
Stard6	2.27836	5e-05
Pla2g4c	2.27987	5e-05
Necab3	2.28006	5e-05
Bmpr1a	2.28057	5e-05
Hspa2	2.28285	5e-05
Capn3	2.28485	5e-05
Kif23	2.28489	5e-05
Setbp1	2.28651	5e-05
Tmem51	2.28873	5e-05
Cass4	2.28938	5e-05
Cdk6	2.2905	5e-05
Abcc3	2.29211	5e-05
Prim1	2.29695	5e-05
Il3ra	2.29733	5e-05
Pigz	2.30105	5e-05
Adam15	2.30348	5e-05
4930422G04Rik	2.30517	5e-05
Angptl4	2.3059	5e-05
1700097N02Rik	2.30652	5e-05
Tnfsf9	2.30667	5e-05
Klf10	2.31005	5e-05
Fam33a	2.31109	5e-05
1810055G02Rik	2.31534	5e-05
Ldlr	2.32063	5e-05
Wdr67	2.32162	5e-05
Slc5a11	2.3252	5e-05
Fen1	2.33044	5e-05
Plxnd1	2.33449	5e-05
Gbp10	2.33865	5e-05
Mapk8ip1	2.34172	5e-05
Srgap3	2.34333	5e-05
Sap30	2.34436	5e-05
Dip2a	2.34519	5e-05
Ctsf	2.34867	5e-05
Rfc3	2.35039	5e-05
Sytl2	2.35412	5e-05
Clic4	2.35825	5e-05
Arhgap21	2.35996	5e-05
Bcl2l2	2.36014	5e-05
Igsf10	2.361	5e-05
Camk2n2	2.36112	0.0008
4930550C14Rik	2.36563	0.0177
Myo1f	2.37278	5e-05
Myl10	2.3732	5e-05
Ndrg1	2.37337	5e-05
Acsbg1	2.37498	5e-05
Ptgdr	2.37876	5e-05
Lancl2	2.37916	5e-05
Rgag4	2.38337	5e-05
Cxcl10	2.38491	5e-05
Nek4	2.38761	5e-05
Irf5	2.38774	5e-05
Aplp1	2.38964	5e-05
Psat1	2.39177	5e-05
Sh2d5	2.39184	5e-05
Kif20b	2.40105	5e-05
Dyrk4	2.40334	5e-05
Sh3bgrl	2.40784	5e-05
Wdr95	2.40807	5e-05
Susd3	2.40957	5e-05
Cd44	2.42053	5e-05
Fanca	2.42212	5e-05
Kifc5b	2.42585	5e-05
Tnf	2.4261	5e-05
Tnfsf14	2.42624	5e-05
Mcm5	2.42949	5e-05
Fam132b	2.43357	5e-05
Ms4a4c	2.43402	5e-05
Mtap7d3	2.43592	5e-05
Tspan4	2.43731	5e-05
Irf8	2.43907	5e-05
Sdc3	2.44124	5e-05
Rps4y2	2.44218	5e-05
4930599N23Rik	2.44399	0.0083
Pbx4	2.44529	5e-05
Prr13	2.4478	5e-05
Megf11	2.44795	5e-05
A930041C12Rik	2.44818	0.0071
Pgm2	2.44873	5e-05
Hist1h2bg	2.45233	0.0218
Ifi27l2a	2.45388	5e-05
Gm5465	2.45404	5e-05
2410022L05Rik	2.45988	0.0039
Srcrb4d	2.46054	5e-05
Trim46	2.46883	5e-05
Myo10	2.4692	5e-05
Csf1	2.47009	5e-05
Pqlc3	2.4747	5e-05
Cryz	2.4756	5e-05
Rbpj	2.47857	5e-05
Pafah1b3	2.48503	5e-05
9330179D12Rik	2.48589	5e-05
Rbm20	2.48954	5e-05
Lxn	2.48982	5e-05
Tmem176a	2.49672	5e-05
Celf5	2.49679	5e-05
Smc2	2.50336	5e-05
Car5b	2.50547	5e-05
Dram1	2.51021	0.00055
1700048O20Rik	2.51806	5e-05
Sh3yl1	2.5184	5e-05
Gm5506	2.5207	5e-05
Nt5e	2.52343	5e-05
Galk1	2.53088	5e-05
Pkig	2.53589	5e-05
Phldb1	2.53697	5e-05
Rnf19b	2.5376	5e-05
Als2cr4	2.54647	5e-05
Eno1	2.54779	5e-05
Gzmk	2.5495	5e-05
Carhsp1	2.55059	5e-05
Chtf18	2.56254	5e-05
Pion	2.56409	5e-05
Dok4	2.56505	5e-05
Ccdc123	2.57483	5e-05
Yes1	2.57723	5e-05
Zfp41	2.58757	5e-05
Myo3b	2.59147	5e-05
Acadl	2.59154	5e-05
Smtnl2	2.59181	5e-05
Ryr3	2.59344	5e-05
Pex11a	2.59508	0.0157
Glis2	2.59798	5e-05
Clec4n	2.60158	5e-05
Brca2	2.60235	5e-05
Pck2	2.60895	5e-05
Shisa2	2.6099	5e-05
Fbxo5	2.61541	5e-05
Bbs12	2.61545	5e-05
Ropn1l	2.61713	0.00225
Ift122	2.61793	5e-05
4930427A07Rik	2.62018	5e-05
Mettl7a1	2.62605	5e-05
Slc35d3	2.62646	0.0006
Gm9199	2.62841	5e-05
BC018242	2.63333	5e-05
1700029G01Rik	2.63402	5e-05
6720401G13Rik	2.63459	5e-05
Syngr4	2.63534	0.0126
Gm9895	2.63575	0.00975
Atpif1	2.63776	5e-05
Gen1	2.65544	5e-05
Kcnk6	2.6557	5e-05
Prss30	2.65574	5e-05
Sdc4	2.6573	5e-05
Prdm1	2.65856	5e-05
Serhl	2.66144	5e-05
Gpr179	2.66295	5e-05
Atp10a	2.66559	5e-05
AW555464	2.66665	5e-05
Ccdc112	2.67218	5e-05
Stx11	2.67479	5e-05
Pola1	2.67706	5e-05
Cysltr2	2.68271	5e-05
St3gal2	2.68466	5e-05
Kpna2	2.6896	5e-05
Grn	2.69151	5e-05
1700042O10Rik	2.69374	0.0008
Pgam1	2.69633	5e-05
BC055324	2.69659	5e-05
Unc93b1	2.69783	5e-05
Spata24	2.70347	5e-05
Acvr1	2.70615	5e-05
Abhd4	2.7087	5e-05
Tmem107	2.71093	5e-05
Slc39a4	2.71188	5e-05
Baiap2l2	2.71202	0.0021
Gucy1b3	2.71209	5e-05
Lamb3	2.71273	5e-05
Tmem106a	2.7131	5e-05
Cldn12	2.71653	5e-05
Kcnq5	2.71656	5e-05
Cfb	2.71787	5e-05
Dut	2.71983	5e-05
Acot11	2.72162	5e-05
Ppfibp1	2.72365	5e-05
Klre1	2.73166	5e-05
Lsr	2.73199	5e-05
Ctnna1	2.7336	5e-05
Egln3	2.74044	5e-05
Fbxw8	2.74223	5e-05
Ccdc50	2.74301	5e-05
Ly6i	2.74466	5e-05
Mocos	2.74759	5e-05
Tbc1d7	2.76314	5e-05
Adarb1	2.76706	5e-05
Polq	2.77029	5e-05
Cpa3	2.77303	0.0019
Fah	2.77434	5e-05
Ccdc34	2.77766	5e-05
Cenpl	2.77794	5e-05
Vim	2.78079	5e-05
Cercam	2.78637	5e-05
Pde4a	2.78769	5e-05
Gnaq	2.79426	5e-05
Hist1h2bc	2.79531	5e-05
Lmtk3	2.79631	5e-05
Rbm44	2.80143	5e-05
Hist1h2ag	2.80268	0.0144
Kmo	2.80529	5e-05
Rasgef1a	2.80915	5e-05
6330403K07Rik	2.81504	5e-05
Sestd1	2.8155	5e-05
Pkm2	2.81957	5e-05
Eea1	2.8325	5e-05
Ezh2	2.83811	5e-05
Atad5	2.84621	5e-05
Ociad2	2.85375	5e-05
Spry1	2.85711	5e-05
Dusp4	2.85794	5e-05
Fanci	2.86188	5e-05
Dhdh	2.86255	5e-05
Rap1gap	2.86424	5e-05
Fbxo48	2.86895	5e-05
Cchcr1	2.87144	5e-05
Bcl2a1b	2.87356	5e-05
4632434I11Rik	2.87369	5e-05
Poc1a	2.87699	5e-05
Tmem97	2.87751	5e-05
Txlnb	2.87793	5e-05
Hemk1	2.88362	5e-05
Itih5	2.89478	5e-05
Kank3	2.89649	5e-05
Txn1	2.90121	5e-05
Aldoa	2.90215	5e-05
Mrgpre	2.90717	5e-05
9330159M07Rik	2.90914	0.0001
Rilpl1	2.90928	5e-05
Tm4sf5	2.90992	0.00915
Mfsd2a	2.92707	5e-05
Atg9b	2.93014	5e-05
Ikbip	2.9303	5e-05
Maged2	2.93217	5e-05
Recql4	2.93439	5e-05
Tipin	2.93737	5e-05
Slc41a2	2.93808	5e-05
Mcm8	2.94588	5e-05
Pdgfb	2.94707	5e-05
Clec4d	2.94897	0.0035
Arap3	2.94928	5e-05
Prdm5	2.94953	0.0002
Pcdhgc3	2.95272	5e-05
Cdh1	2.95472	5e-05
B230217C12Rik	2.9583	0.00165
Mapk12	2.96157	5e-05
Cecr6	2.96619	5e-05
Tmem67	2.97564	5e-05
Scd2	2.97628	5e-05
Rnf43	2.9763	5e-05
Kctd17	2.97785	5e-05
Cks2	2.97971	5e-05
Thrb	2.98455	5e-05
Incenp	2.99516	5e-05
E2f2	2.99772	5e-05
Trim36	2.99949	5e-05
Myadm	3.00842	5e-05
Fut7	3.01753	5e-05
Fam78b	3.01793	5e-05
Arntl2	3.01889	0.00135
Klrc2	3.02908	5e-05
Cacnb3	3.04322	5e-05
St6galnac6	3.04339	5e-05
Tbx21	3.04625	5e-05
Myo1e	3.05021	5e-05
Pilrb2	3.05559	5e-05
Hipk4	3.056	0.00135
Oit3	3.05857	0.0009
Asf1b	3.06042	5e-05
Bcam	3.06138	5e-05
Eif4ebp1	3.06344	5e-05
1700040L02Rik	3.07063	5e-05
Fnip2	3.07377	5e-05
Cyb561	3.07725	5e-05
Lmnb1	3.08038	5e-05
Nqo1	3.08147	0.0002
Arl11	3.08157	0.0099
Irf4	3.08323	5e-05
Morn2	3.08763	0.0014
Ncapd2	3.09086	5e-05
Ifitm3	3.09233	5e-05
Fam72a	3.09245	5e-05
Capn5	3.09353	5e-05
Gadd45g	3.09811	5e-05
C530028O21Rik	3.10061	5e-05
Cd63	3.12415	5e-05
Mx1	3.12612	5e-05
Fam164a	3.13318	5e-05
Atxn7l1	3.1451	5e-05
Glrx	3.14955	5e-05
Cox6a2	3.15147	0.0199
Sqle	3.15541	5e-05
Plekhg3	3.15717	5e-05
Sema6b	3.16128	5e-05
Kif18a	3.16273	5e-05
Plk4	3.16374	5e-05
Rora	3.16626	5e-05
Ppp2r3a	3.16954	5e-05
Tubb6	3.17575	5e-05
Slc29a4	3.18126	0.00095
Tmem220	3.1875	0.0059
Nrbp2	3.19356	5e-05
Il12rb1	3.19358	5e-05
Iigp1	3.19522	5e-05
Id2	3.19773	5e-05
2210403K04Rik	3.19903	5e-05
Sowahc	3.20067	5e-05
Scpep1	3.20073	5e-05
Bard1	3.20613	5e-05
Apol7b	3.20736	5e-05
Rrm1	3.20758	5e-05
Slc9a5	3.20763	5e-05
Kif24	3.20791	5e-05
Prdx4	3.2089	5e-05
Capsl	3.21009	0.00595
Bzrap1	3.22208	5e-05
Aqp9	3.22212	5e-05
Gnb5	3.23212	5e-05
Prnp	3.23223	5e-05
Ccdc99	3.23597	5e-05
Brip1	3.23975	5e-05
F2rl2	3.24066	5e-05
Pole	3.24107	5e-05
Trpv4	3.24123	0.00085
Gm11110	3.24238	5e-05
Tspan2	3.24496	5e-05
Dhfr	3.24697	5e-05
8430427H17Rik	3.25218	5e-05
Cxcr3	3.25994	5e-05
Gcnt2	3.26469	5e-05
Palm	3.26473	5e-05
Amdhd1	3.27019	0.0001
Tspan17	3.28065	0.0042
Tctex1d2	3.28074	5e-05
Tyms	3.28425	5e-05
Nr4a2	3.2872	5e-05
Gm5177	3.29139	0.0007
Naip2	3.2919	5e-05
Gcnt1	3.29782	5e-05
Gm12070	3.2991	5e-05
Plp2	3.30656	5e-05
Rnase4	3.31348	0.01865
Csda	3.31385	5e-05
Rhoc	3.31535	5e-05
4833419F23Rik	3.32123	5e-05
2010300C02Rik	3.33532	5e-05
Sord	3.33688	5e-05
Spnb3	3.34209	5e-05
Cenpa	3.34617	5e-05
2610318N02Rik	3.34917	5e-05
9030625A04Rik	3.34986	5e-05
C3	3.35047	5e-05
Cox7a1	3.35388	0.0065
Tcf19	3.36636	5e-05
E2f1	3.36849	5e-05
Arl6	3.36952	5e-05
Traip	3.3765	5e-05
Acot7	3.39213	5e-05
Impa2	3.39643	5e-05
Gapdh	3.39811	5e-05
Capg	3.40073	5e-05
Pxmp2	3.40614	5e-05
Ifi204	3.41006	5e-05
Cd38	3.41556	5e-05
Wee1	3.41578	5e-05
B4galt4	3.41598	5e-05
Ticam2	3.41942	5e-05
Klrb1f	3.42329	5e-05
Tbc1d2	3.43076	5e-05
Apbb1	3.43404	5e-05
Itga2	3.4371	5e-05
P2ry13	3.44105	0.00145
Gins1	3.44133	5e-05
Apitd1	3.44574	5e-05
Sccpdh	3.44589	5e-05
Ier5l	3.44672	5e-05
Hells	3.45555	5e-05
Tmem25	3.46107	0.0001
Optn	3.4616	5e-05
Kcnk7	3.46534	0.0001
Itpka	3.47	0.0001
Fbxo44	3.47565	5e-05
2700099C18Rik	3.47624	5e-05
Fggy	3.48064	5e-05
Slc35f5	3.48068	5e-05
Tg	3.48355	5e-05
Lig1	3.4861	5e-05
Osgin1	3.48803	5e-05
Slc12a8	3.48831	0.00015
Dscc1	3.49878	5e-05
Tube1	3.49923	5e-05
Tnfsf12	3.49941	0.03815
Enpp2	3.50149	5e-05
Cd160	3.50389	5e-05
Ctnnbip1	3.50668	5e-05
Whsc1	3.50929	5e-05
Plekhf1	3.5153	5e-05
Ikzf4	3.51549	5e-05
4930486L24Rik	3.51781	5e-05
Camk2n1	3.52336	5e-05
Il17rd	3.52485	5e-05
Marco	3.52521	0.004
B4galnt4	3.53038	5e-05
Egfl7	3.53233	5e-05
Akr1c12	3.53336	5e-05
Ppap2c	3.53357	5e-05
Ndc80	3.53679	5e-05
Rem2	3.54126	0.00555
Ston1	3.54713	0.004
Cadm1	3.55375	5e-05
Gbp11	3.55486	5e-05
Lix1l	3.55679	5e-05
Nfil3	3.55944	5e-05
Fam161a	3.56102	5e-05
4831426I19Rik	3.56127	5e-05
Slc7a3	3.56408	5e-05
Trib3	3.56666	5e-05
Spata7	3.56977	5e-05
Mad2l1	3.57709	5e-05
Jazf1	3.58799	5e-05
9530077C05Rik	3.5894	5e-05
Cpd	3.59502	5e-05
D2Ertd750e	3.59516	5e-05
Gmnn	3.59641	5e-05
Gpr55	3.59996	5e-05
Anxa9	3.60041	5e-05
2900041M22Rik	3.60192	5e-05
Cdkn2c	3.60725	5e-05
Pacsin3	3.61434	0.00045
Fam69b	3.62152	5e-05
Axl	3.62616	5e-05
Nid2	3.62875	0.00015
1110067D22Rik	3.63412	5e-05
2010107G23Rik	3.63764	0.0032
Myl4	3.64374	5e-05
Ltbp4	3.64861	0.00015
Hdhd3	3.65531	0.0035
Napsa	3.66458	5e-05
Il1rl1	3.66689	5e-05
5430427O19Rik	3.67132	5e-05
Rnf208	3.67732	0.00065
Arhgap11a	3.68449	5e-05
Hist1h2ae	3.68904	0.0032
Pter	3.69039	5e-05
Ndrg4	3.70131	5e-05
Tmem180	3.70399	5e-05
Gipc3	3.70778	0.00265
Aph1b	3.70921	5e-05
Il18rap	3.71225	5e-05
Cdkl2	3.71548	5e-05
Stk39	3.7182	5e-05
Reep1	3.72371	5e-05
Kifc1	3.72621	5e-05
Rsph9	3.72675	0.0005
Dmwd	3.73116	5e-05
Arhgdig	3.73189	5e-05
Ncs1	3.73551	5e-05
Gpt2	3.73979	5e-05
Pgk1	3.74374	5e-05
F830016B08Rik	3.75636	5e-05
E130303B06Rik	3.75747	5e-05
Gas2	3.76326	5e-05
Gm17745	3.76972	5e-05
Gucy1a3	3.77598	5e-05
Klrk1	3.77727	5e-05
Mybl1	3.79805	5e-05
Casp3	3.80028	5e-05
Mnda	3.80951	0.00275
Litaf	3.80976	5e-05
Arhgap33	3.81261	5e-05
Dna2	3.82265	5e-05
5730409E04Rik	3.82856	5e-05
Hmgb2	3.82931	5e-05
Cyfip1	3.83076	5e-05
Oscp1	3.83334	5e-05
Ccdc40	3.83559	5e-05
Cenpw	3.83615	5e-05
Slc15a3	3.84493	5e-05
Eme1	3.84787	5e-05
Anxa4	3.85075	5e-05
Ppap2a	3.85096	0.0005
Mtap9	3.85198	5e-05
Fam129a	3.86314	5e-05
Cela1	3.86793	0.00285
Asph	3.87038	5e-05
1110032F04Rik	3.88377	5e-05
Ogfrl1	3.89148	5e-05
Slc6a9	3.90859	5e-05
Ptms	3.91553	5e-05
Myl6b	3.91968	0.00025
Ccl4	3.93975	5e-05
Dcxr	3.95597	5e-05
A930038C07Rik	3.96866	5e-05
Cd200r1	3.97025	5e-05
Zeb2	3.9716	5e-05
Nmral1	3.99361	5e-05
Runx2	3.99851	5e-05
Atcay	3.99915	5e-05
Gpr56	4.00659	5e-05
Pdcd1lg2	4.01222	5e-05
Tmbim1	4.01227	5e-05
Cd93	4.01313	5e-05
Gm14005	4.01812	5e-05
Hmgn3	4.02638	5e-05
Gm8369	4.03711	5e-05
Ston2	4.04264	5e-05
Naip5	4.04304	5e-05
Syt5	4.04579	0.00275
Gm13293	4.04702	0.0029
Lrfn4	4.06089	5e-05
Rgs9	4.06895	0.0003
Zfp941	4.06897	0.00015
Zwilch	4.07691	5e-05
Ccdc18	4.07819	5e-05
Arhgef9	4.08186	0.0001
Gas2l1	4.10099	5e-05
Ang	4.10321	0.0083
Syce2	4.10941	5e-05
Gabarapl1	4.10972	5e-05
Clnk	4.11902	0.00265
Brca1	4.1339	5e-05
Ell2	4.13494	5e-05
Nhedc2	4.13512	0.0001
Slc1a4	4.13554	5e-05
Plek	4.14078	5e-05
Ptgr1	4.15249	5e-05
Fam19a3	4.15477	5e-05
Ccrl2	4.15955	5e-05
Ccdc80	4.15979	0.0026
Nsl1	4.16351	5e-05
Msr1	4.16633	0.0025
Svip	4.17181	0.00025
Vsig10	4.17531	5e-05
Kdelc2	4.1758	5e-05
Fam129b	4.17651	5e-05
Coro2a	4.19722	5e-05
Casp1	4.2053	5e-05
Kif5a	4.21062	5e-05
Nphp1	4.21113	5e-05
Lrrk1	4.21407	5e-05
Mybl2	4.21936	5e-05
C030034L19Rik	4.22326	5e-05
E130306D19Rik	4.22333	5e-05
Tacc3	4.22725	5e-05
Zc3h12c	4.23053	5e-05
D10Bwg1379e	4.23711	5e-05
Pcgf2	4.23941	5e-05
Pask	4.24079	5e-05
Rad51l1	4.24657	5e-05
Ly6c1	4.2524	5e-05
Uhrf1	4.25772	5e-05
Tmem2	4.27751	5e-05
Krt18	4.27887	0.0026
Inppl1	4.28662	5e-05
Pak6	4.29382	5e-05
Ptger2	4.31207	5e-05
Foxm1	4.32392	5e-05
Cdca2	4.32448	5e-05
Ly6a	4.32773	5e-05
Dpep2	4.32897	0.0026
4930428O21Rik	4.33325	0.0026
Gpr34	4.33766	5e-05
Itga1	4.33936	5e-05
Anubl1	4.34133	5e-05
Cdc45	4.34217	5e-05
Cenpn	4.36903	5e-05
B9d1	4.38472	0.0001
Phactr2	4.38493	5e-05
Rnf144b	4.38719	0.0001
Smyd1	4.38874	5e-05
Arhgap19	4.39308	5e-05
Nrp1	4.39358	5e-05
Hmgb3	4.40941	5e-05
Nid1	4.41091	5e-05
Tex15	4.41597	5e-05
Slc25a24	4.41908	5e-05
Aurka	4.42029	5e-05
Nkain1	4.42031	0.0001
Lamc1	4.42624	5e-05
Gpm6b	4.42796	5e-05
Slamf7	4.43499	5e-05
Dusp9	4.43769	0.0026
Ect2	4.45195	5e-05
Vash1	4.45431	5e-05
Tmem231	4.45434	5e-05
Tlr4	4.45627	5e-05
Ctla2a	4.4618	5e-05
Exo1	4.46593	5e-05
Kif22	4.46678	5e-05
Ifi44	4.46853	5e-05
2610021K21Rik	4.48245	5e-05
Pik3ap1	4.49056	5e-05
Phf19	4.4944	5e-05
Pros1	4.49935	5e-05
Asb2	4.50017	5e-05
Cenph	4.50819	5e-05
Chrm4	4.51132	5e-05
1190002F15Rik	4.54018	5e-05
Endod1	4.55425	5e-05
Pnp2	4.55773	0.0026
BC048355	4.56269	5e-05
Synpo	4.57076	5e-05
Cks1b	4.57375	5e-05
Smpdl3b	4.57675	5e-05
Hk2	4.58132	5e-05
Fabp5	4.58163	5e-05
Ncaph	4.58441	5e-05
Slc2a6	4.59005	5e-05
P2ry12	4.59152	0.0004
St6galnac2	4.59366	5e-05
Ptprj	4.60132	5e-05
Pon3	4.61225	5e-05
Entpd1	4.61385	5e-05
Gpnmb	4.62264	5e-05
6430571L13Rik	4.64244	5e-05
Cenpk	4.64267	5e-05
Serpinb6a	4.65122	5e-05
Gcat	4.66412	5e-05
Gpr141	4.66766	5e-05
Ccdc57	4.67033	0.0026
Tmem163	4.67638	5e-05
Dsg2	4.67944	0.0026
Ckap2	4.68412	5e-05
Cd244	4.68673	5e-05
2010002N04Rik	4.68815	5e-05
Spc25	4.69337	5e-05
Plk2	4.69592	5e-05
Aifm2	4.69738	0.00395
Itpripl2	4.69956	5e-05
Cdc20	4.70341	5e-05
C330027C09Rik	4.70671	5e-05
Diap3	4.70686	5e-05
BC068157	4.72251	5e-05
Ptpn13	4.73192	5e-05
Aoah	4.73413	0.0026
Gins2	4.73731	5e-05
Ccne2	4.74858	5e-05
Mtap1a	4.7556	0.00035
Stmn1	4.75949	5e-05
Csrp2	4.7632	5e-05
Chek1	4.7664	5e-05
Hcn2	4.76841	0.01115
1110046J04Rik	4.76882	0.0008
Tpi1	4.77235	5e-05
Dusp3	4.78561	5e-05
D430020J02Rik	4.78792	5e-05
Eps8	4.79101	0.0026
Nupr1	4.80431	0.0026
Cenpi	4.80893	5e-05
Pcdhgc5	4.81298	0.0246
Il18	4.81316	5e-05
Raph1	4.81532	5e-05
Ankrd35	4.81579	0.0001
Gab2	4.81764	5e-05
Fam54a	4.82789	5e-05
Rtkn2	4.83061	0.0001
Rad54b	4.83611	5e-05
Tjp2	4.83979	5e-05
Spire1	4.84131	5e-05
Ccr1	4.84212	5e-05
Adap1	4.84238	5e-05
Cish	4.84995	5e-05
Slc22a15	4.87298	5e-05
Anxa2	4.883	5e-05
Cntln	4.89525	5e-05
Prr5l	4.89669	5e-05
Ccl3	4.90168	5e-05
Slco4a1	4.90863	5e-05
Tnfrsf9	4.90918	5e-05
Fancd2	4.91395	5e-05
Dyrk3	4.93319	5e-05
Irak1bp1	4.93592	5e-05
Dlgap5	4.93848	5e-05
Gm17762	4.94422	0.02975
4930431P03Rik	4.94881	5e-05
Gtse1	4.95265	5e-05
Slc43a3	4.95941	5e-05
Car13	4.96904	0.0001
Ankle1	4.97167	5e-05
Hic1	4.97865	5e-05
Chaf1a	4.99348	5e-05
Gzma	5.00382	5e-05
Ifng	5.00549	5e-05
Rgs18	5.01018	0.0001
Orc1	5.01887	5e-05
Flywch2	5.02133	0.0026
Prss16	5.02877	5e-05
4930506M07Rik	5.03086	5e-05
Osbpl1a	5.03702	5e-05
Ltk	5.04605	5e-05
Casp4	5.06168	5e-05
Irg1	5.08163	0.0026
Atp2b4	5.0959	5e-05
Ltb4r1	5.105	0.0026
Lgals1	5.10972	5e-05
Phlda3	5.12134	5e-05
Il12rb2	5.12554	5e-05
Hpse	5.13211	5e-05
Bnip3	5.14213	5e-05
Atf3	5.14818	0.0026
Cenpp	5.15144	5e-05
B3galt5	5.17864	5e-05
Syngr3	5.17986	0.0001
Rgs16	5.18739	5e-05
Ankrd29	5.19274	5e-05
Rad51ap1	5.19413	5e-05
Xcl1	5.19595	5e-05
Dscam	5.20487	5e-05
Naip6	5.21623	5e-05
S100a1	5.23068	5e-05
Aldoc	5.24295	5e-05
Parvb	5.24939	0.0026
Cdc6	5.24979	5e-05
Ctla2b	5.2638	5e-05
Cdca8	5.26405	5e-05
Tigit	5.26413	5e-05
Prr5	5.26424	5e-05
Ccnf	5.28683	5e-05
Plk1	5.29307	5e-05
Crmp1	5.30598	5e-05
Smtn	5.30885	5e-05
Jdp2	5.31684	5e-05
Zbtb7b	5.32035	5e-05
Dkkl1	5.32904	0.0001
Trip13	5.32911	5e-05
Kdm4d	5.3343	0.0026
Clec12a	5.33482	5e-05
Nlrp3	5.34179	0.0001
Anxa1	5.35001	5e-05
Fignl1	5.35211	5e-05
Xkr5	5.3693	5e-05
Pik3r6	5.38826	0.0161
Soat2	5.39686	5e-05
Rnf152	5.39738	0.00125
5730590G19Rik	5.40865	5e-05
Echdc2	5.42158	5e-05
Tnp2	5.42517	5e-05
Gucy2e	5.42559	0.0026
Nrgn	5.43416	5e-05
Cenpm	5.43669	5e-05
Pygl	5.4536	5e-05
Spc24	5.45416	5e-05
1700025K23Rik	5.47597	0.0026
Oip5	5.47888	5e-05
Fut4	5.48206	5e-05
Clspn	5.48333	5e-05
Pdcd1	5.49184	5e-05
Farp1	5.51445	5e-05
D630045J12Rik	5.51882	0.00155
Mis18bp1	5.5229	5e-05
Gatm	5.53264	5e-05
Hmmr	5.5359	5e-05
Bst1	5.54662	0.0026
H1f0	5.54826	5e-05
Nebl	5.55164	5e-05
S100a6	5.55225	5e-05
2013-03-08	5.55773	5e-05
Dixdc1	5.57031	5e-05
Cit	5.57053	5e-05
Fam83d	5.58225	5e-05
Ugt1a7c	5.58259	5e-05
Tmem159	5.58401	5e-05
Rad54l	5.60006	5e-05
Cdca5	5.6405	5e-05
Emilin2	5.65041	5e-05
Bcl2a1d	5.67399	5e-05
Mdfic	5.68019	5e-05
Tgm2	5.68329	5e-05
Mnd1	5.68837	0.0026
Neurl1b	5.69264	5e-05
Tuba8	5.7081	0.0026
Ccr5	5.71384	5e-05
Serpinb9b	5.71807	0.0026
P4ha2	5.72007	5e-05
Anln	5.72348	5e-05
Spry2	5.72385	5e-05
Prc1	5.74639	5e-05
2610002D18Rik	5.78802	5e-05
St14	5.7996	5e-05
Oaf	5.80266	0.0026
Kif20a	5.80413	5e-05
Kntc1	5.81607	5e-05
Tnfsf13b	5.81973	5e-05
Lrr1	5.82008	5e-05
Itga7	5.82073	5e-05
Sema4c	5.82736	0.0001
Rad51	5.82818	5e-05
Dtl	5.84692	5e-05
Morn4	5.85455	0.0026
B430319G15Rik	5.86946	0.0126
Clip3	5.87764	0.0026
Inha	5.88036	0.0026
Pilrb1	5.88207	0.0001
Rnf128	5.8999	5e-05
Chst2	5.90243	5e-05
Sgol2	5.90482	5e-05
S100a4	5.93342	5e-05
Kit	5.93589	5e-05
Nuf2	5.96	5e-05
Cdca3	5.97464	5e-05
Metrnl	5.98028	5e-05
Alcam	6.00265	5e-05
Ncapg2	6.00549	5e-05
P2ry14	6.01022	5e-05
Ifitm1	6.01503	5e-05
Arhgef25	6.01967	0.0001
Adam8	6.04267	5e-05
Fsbp	6.05579	0.01275
Casc5	6.06626	5e-05
F630043A04Rik	6.08752	5e-05
Kcnk5	6.10337	5e-05
Plod2	6.11402	5e-05
Zbtb32	6.11411	5e-05
2810030E01Rik	6.13635	0.0026
1500009L16Rik	6.14003	5e-05
Lancl3	6.14391	0.0026
Top2a	6.14776	5e-05
Mxd3	6.15808	5e-05
Uchl1	6.16015	5e-05
Klrc1	6.162	5e-05
Ccna2	6.1787	5e-05
Ltbp3	6.17897	0.03845
Rrm2	6.1867	5e-05
Cenpe	6.19992	5e-05
Gas2l3	6.22227	5e-05
Gls2	6.24515	0.0279
Mlkl	6.2529	5e-05
Cdkn3	6.28781	5e-05
2810442I21Rik	6.31514	0.0026
Hip1	6.31755	5e-05
Tk1	6.32246	5e-05
Havcr2	6.35806	5e-05
Mcm10	6.36562	5e-05
Sgol1	6.37877	5e-05
Mastl	6.38329	5e-05
Dio2	6.39537	0.0026
Rab27b	6.40477	5e-05
Gm4841	6.41201	5e-05
Prelid2	6.41696	5e-05
Socs2	6.42739	5e-05
Ncald	6.43473	5e-05
Prr11	6.44086	5e-05
Ncapg	6.45314	5e-05
Pcdhgc4	6.4569	0.00085
E2f8	6.46194	5e-05
Gstt3	6.47818	5e-05
Mki67	6.4816	5e-05
Fam20a	6.48495	5e-05
Bub1b	6.52638	5e-05
Grtp1	6.52697	0.0002
Wdr54	6.56513	0.0026
Actr3b	6.64169	5e-05
Ckap2l	6.67612	5e-05
Trp73	6.70304	0.0012
Kif4	6.71896	5e-05
4930547N16Rik	6.72597	5e-05
Klra5	6.72678	5e-05
Ifitm2	6.7331	5e-05
Cdk1	6.73403	5e-05
Espl1	6.73539	5e-05
Tnfsf11	6.74017	5e-05
Ttk	6.74733	5e-05
Slc16a3	6.74838	5e-05
2810417H13Rik	6.74875	5e-05
Birc5	6.75929	5e-05
Stil	6.77278	5e-05
Troap	6.77993	5e-05
Ccnb2	6.79	5e-05
Osbpl3	6.79124	5e-05
Kif15	6.7917	5e-05
Kif11	6.79183	5e-05
Fasl	6.79642	5e-05
Cdc25c	6.8037	5e-05
Esco2	6.81668	5e-05
Tnip3	6.82031	0.0026
Specc1	6.82443	5e-05
Psrc1	6.82913	5e-05
Fam84a	6.85147	0.0026
Cetn4	6.87156	0.0026
Ak4	6.88505	5e-05
Stc2	6.89577	5e-05
Plxdc2	6.91592	5e-05
Sema6d	6.91872	5e-05
Fgl2	6.92095	5e-05
Cep55	6.92638	5e-05
Ctla4	6.92775	5e-05
Batf3	6.93286	0.0026
BC030867	7.00082	5e-05
Vegfa	7.0085	5e-05
Dapk2	7.01413	5e-05
4930583H14Rik	7.02016	5e-05
Serpina3g	7.02166	5e-05
Neil3	7.02323	5e-05
Kif14	7.03253	5e-05
Pkd2	7.05053	0.0026
Ube2c	7.06191	5e-05
Melk	7.06866	5e-05
Lilrb4	7.07564	5e-05
E2f7	7.09493	5e-05
Hemgn	7.09663	0.0026
Ebi3	7.1061	5e-05
Aspm	7.10755	5e-05
Cenpf	7.11081	5e-05
Gm4951	7.13678	5e-05
Bub1	7.14269	5e-05
Tjp1	7.14271	0.00295
Nusap1	7.14865	5e-05
Il2ra	7.15247	5e-05
Bhlhe40	7.15519	5e-05
Tpx2	7.17865	5e-05
Plscr1	7.20611	5e-05
Ryk	7.20801	5e-05
Pcyt1b	7.21138	5e-05
Ccr2	7.22842	5e-05
Pif1	7.23443	5e-05
Rab39b	7.23859	0.0026
Aurkb	7.30473	5e-05
Lrrc49	7.30836	0.0066
Cdk14	7.31925	0.0001
Kif18b	7.32664	5e-05
Shcbp1	7.33215	5e-05
Emp1	7.33329	5e-05
Ccnb1	7.33846	5e-05
Galnt3	7.34343	5e-05
Nek2	7.38844	5e-05
Lgals3	7.391	5e-05
Depdc1a	7.39103	5e-05
Iqgap3	7.45337	5e-05
Bcat1	7.47384	5e-05
Serpina3f	7.50828	5e-05
Bspry	7.51722	5e-05
Spag5	7.54739	5e-05
Gp49a	7.55662	5e-05
Thbs1	7.60628	0.0026
Scin	7.64347	0.0005
Zdhhc2	7.66116	5e-05
Mpp2	7.67819	0.0026
Lag3	7.68314	5e-05
Kif2c	7.69644	5e-05
Ska1	7.70684	5e-05
Pbk	7.70884	5e-05
D630039A03Rik	7.71121	5e-05
Klri2	7.96259	5e-05
Dlg2	7.99895	0.0002
2010317E24Rik	8.1427	0.0026
Plscr4	8.17486	0.0001
Cables1	8.24563	5e-05
Gzmb	8.45887	5e-05
Gzmc	8.48228	5e-05
Mcf2l	8.49579	0.0027
Asns	8.54145	5e-05
Lif	8.57111	5e-05
Ptpn3	8.57207	5e-05
Stk32c	8.582	0.0012
Serpine2	8.61149	5e-05
Cd80	8.74929	0.0026
Nrn1	8.86778	5e-05
Ttc39c	8.92144	5e-05
AA467197	9.00887	5e-05
Spp1	9.12392	0.0001
Fam64a	9.32537	0.0001
Mt1	9.54208	0.0026
Cdkn1a	9.64679	0.0009
Upp1	10.4354	0.0082

## Sheet: Nvs3
	2-fold change cut-off		Total genes: 1574
CuffDiff Analysis: Naïve vs Group 3
Gene	log2(fold_change)	p_value
Il6ra	-10.5391	5e-05
Ccr9	-10.3001	5e-05
Slc16a5	-8.96938	5e-05
Dtx1	-8.68505	5e-05
5830411N06Rik	-7.95516	5e-05
Gabrr2	-7.89887	0.0296
Ampd1	-7.84278	5e-05
Fam101b	-7.66687	5e-05
Trnp1	-7.64174	0.03695
Sh3pxd2a	-7.63426	5e-05
Chst15	-7.33926	5e-05
Atp1b1	-6.99313	5e-05
Itgae	-6.91251	5e-05
Gria3	-6.66296	5e-05
Cd163l1	-6.61054	5e-05
Fcgrt	-6.57047	5e-05
Cd19	-6.43138	0.00265
Igj	-6.31115	5e-05
Plekha6	-6.29095	5e-05
Vipr1	-6.28667	5e-05
Acvrl1	-6.22599	5e-05
Rgmb	-6.0566	5e-05
She	-5.91297	0.00265
Siglecg	-5.91089	0.029
Timp2	-5.88746	5e-05
Cd79a	-5.87904	5e-05
Ngp	-5.8149	0.02765
Vcam1	-5.7787	0.02765
Dntt	-5.76646	5e-05
Ggt5	-5.65163	5e-05
Atp6v0c-ps2	-5.59462	0.03135
Spsb1	-5.57513	5e-05
Igfbp4	-5.52515	5e-05
Tspan9	-5.50645	5e-05
Slc40a1	-5.49186	0.02795
Cyp2d22	-5.46146	5e-05
Lbp	-5.45026	5e-05
Rcn3	-5.44794	5e-05
Kcna2	-5.42533	5e-05
Ccnjl	-5.38764	0.0275
Sh3tc1	-5.35725	0.00265
Cr2	-5.33905	5e-05
Grm6	-5.33831	0.00265
Nfam1	-5.33683	5e-05
Nhsl1	-5.32471	5e-05
St6gal1	-5.31952	5e-05
Abca1	-5.27368	5e-05
Scg5	-5.18935	0.029
Ampd3	-5.16725	5e-05
Klra7	-5.15772	0.028
Amigo2	-5.13596	5e-05
1810006J02Rik	-5.12778	5e-05
Gprc5b	-5.11809	5e-05
Zfp2	-5.10923	0.0016
Mef2c	-5.07422	0.00015
Ksr2	-5.00027	5e-05
Wnt5b	-4.99537	0.00045
Boll	-4.99523	5e-05
Ggt1	-4.94023	5e-05
Slpi	-4.91242	5e-05
Afap1	-4.7929	5e-05
Wfikkn2	-4.77859	5e-05
Zfp318	-4.73448	5e-05
Ankrd55	-4.7277	0.00035
Galnt10	-4.72429	5e-05
Lrrc23	-4.68134	5e-05
Cnn3	-4.62442	5e-05
2610019F03Rik	-4.62214	5e-05
Klf3	-4.6203	5e-05
BC057022	-4.54647	5e-05
Xkrx	-4.52761	5e-05
Trib2	-4.49538	5e-05
G0s2	-4.48097	5e-05
Tmem108	-4.47104	5e-05
C85492	-4.45321	0.00265
Sox4	-4.4469	5e-05
Jup	-4.42373	5e-05
Tle1	-4.39967	5e-05
Dock4	-4.38649	5e-05
Cd7	-4.38558	5e-05
Cacna2d4	-4.38342	5e-05
Adrb2	-4.36141	5e-05
Glt8d2	-4.35825	0.001
Gm11346	-4.34656	5e-05
H2-Aa	-4.30621	5e-05
AI646023	-4.30001	5e-05
Klf2	-4.29433	5e-05
H2-Ob	-4.2628	5e-05
Tcp11l2	-4.25401	5e-05
Zdhhc14	-4.23323	5e-05
D930028M14Rik	-4.23212	5e-05
Hs3st3b1	-4.21415	5e-05
Hp	-4.21223	0.0327
Slc27a6	-4.19604	5e-05
Snn	-4.1702	5e-05
Cd24a	-4.10973	5e-05
Pde2a	-4.08914	5e-05
Nrp2	-4.06023	5e-05
Plaur	-4.04902	5e-05
C630004H02Rik	-4.03036	5e-05
Spib	-4.0267	5e-05
Maged1	-4.02651	5e-05
Man1c1	-4.01183	5e-05
Nacc2	-4.00821	5e-05
Plbd1	-4.00784	0.00265
Rarg	-4.00333	5e-05
Ramp1	-3.99764	5e-05
Kcnh2	-3.9928	5e-05
Gm128	-3.98523	0.0028
Plcb4	-3.96356	5e-05
Rbpms	-3.95194	0.0006
Rgs10	-3.92081	5e-05
Dusp7	-3.92077	5e-05
Emid1	-3.9039	5e-05
Tmie	-3.89346	5e-05
Ldlrap1	-3.87405	5e-05
D8Ertd82e	-3.86881	5e-05
Faim3	-3.85283	5e-05
Trpm1	-3.84526	5e-05
Nckap5l	-3.83835	5e-05
Gm15708	-3.83657	5e-05
Syk	-3.7343	5e-05
Gm10640	-3.72615	5e-05
Rab4a	-3.68187	5e-05
Cacnb1	-3.6646	5e-05
Rasal1	-3.65595	5e-05
Cxxc5	-3.64801	5e-05
S1pr1	-3.64051	5e-05
Actn1	-3.62054	5e-05
Adcy6	-3.61508	5e-05
Sipa1l2	-3.58853	5e-05
S100a9	-3.5812	5e-05
Ttc28	-3.56636	5e-05
Shb	-3.5585	5e-05
Dirc2	-3.55327	5e-05
Tsc22d3	-3.54484	5e-05
Tcf7l1	-3.53426	5e-05
Tcp11	-3.50529	5e-05
Rps6ka2	-3.50089	5e-05
Pik3c2b	-3.49872	5e-05
Sorcs2	-3.48851	5e-05
Arhgap29	-3.47406	5e-05
1700061G19Rik	-3.47293	0.0041
H2-Eb1	-3.46277	5e-05
Slc16a10	-3.45237	5e-05
Arhgap5	-3.43199	5e-05
As3mt	-3.42616	5e-05
Angptl2	-3.42569	0.00055
Gm12505	-3.39172	5e-05
Cd79b	-3.37901	5e-05
Irf6	-3.37879	5e-05
Cnr2	-3.37184	5e-05
Rnf144a	-3.35723	5e-05
Rftn2	-3.33631	5e-05
Il6st	-3.33276	5e-05
Rab20	-3.32866	5e-05
Frat1	-3.31419	5e-05
Arhgef11	-3.30571	5e-05
Pnck	-3.30244	0.0003
Syde1	-3.28434	5e-05
Trat1	-3.27731	5e-05
Sgk1	-3.26726	5e-05
Raver2	-3.24819	5e-05
Dnajc28	-3.24693	5e-05
Mylip	-3.24483	5e-05
Sema4g	-3.23869	5e-05
Zfp879	-3.22982	0.00505
Laptm4b	-3.22905	5e-05
Vmn2r97	-3.22049	5e-05
1700102P08Rik	-3.21332	5e-05
Rapgef4	-3.1885	5e-05
Gpr146	-3.186	5e-05
Ptk2	-3.17872	5e-05
4933430H15Rik	-3.16859	5e-05
Csf3r	-3.16405	5e-05
Sidt1	-3.15779	5e-05
Rtn4rl1	-3.15747	5e-05
Apobec2	-3.14697	0.0001
Fgd2	-3.13411	0.0001
Wdfy4	-3.1251	5e-05
Btk	-3.11774	0.0001
Xlr3b	-3.11414	5e-05
Hist2h3c1	-3.10586	5e-05
5430425J12Rik	-3.10421	0.0133
Stx1a	-3.09934	5e-05
Adh1	-3.09557	0.00075
Zscan18	-3.08389	5e-05
Hcn3	-3.08182	5e-05
Nsg2	-3.07358	5e-05
B430306N03Rik	-3.06301	5e-05
Trim47	-3.06235	5e-05
Nacad	-3.06042	5e-05
Peg13	-3.0432	5e-05
Gm14085	-3.03992	5e-05
Celsr2	-3.01894	5e-05
Ovgp1	-3.01238	5e-05
Bambi-ps1	-3.0098	5e-05
Hsd11b1	-3.00524	5e-05
2410066E13Rik	-3.00467	5e-05
Cd55	-3.00255	5e-05
Prrt1	-3.00196	5e-05
Tgfbr3	-2.99119	5e-05
Kcnc1	-2.98684	5e-05
Efna2	-2.98386	0.026
Trim15	-2.95809	0.00315
Dnajc6	-2.94876	5e-05
Clcf1	-2.94138	5e-05
Spaca1	-2.94065	5e-05
Prss12	-2.94018	5e-05
B630019K06Rik	-2.9397	5e-05
Als2cl	-2.9344	5e-05
Pacsin1	-2.92902	5e-05
Zfp36	-2.92017	5e-05
Slc12a7	-2.91476	5e-05
Slc26a11	-2.91413	5e-05
Nr1d1	-2.91049	5e-05
Mex3a	-2.89965	5e-05
Guca1b	-2.89415	5e-05
Dok3	-2.88847	5e-05
Pdzd4	-2.87019	5e-05
Adamtsl4	-2.86037	5e-05
Slc3a1	-2.85035	0.0001
Sell	-2.84466	5e-05
Mical3	-2.83752	5e-05
Enc1	-2.82495	5e-05
Col23a1	-2.82436	5e-05
Mmp15	-2.82326	5e-05
Zbtb10	-2.82284	5e-05
Trio	-2.81799	5e-05
Cxcr5	-2.81684	5e-05
Chst3	-2.80917	5e-05
Plekho1	-2.8083	5e-05
Olfr1033	-2.80793	5e-05
Nlrc4	-2.80268	5e-05
App	-2.79964	5e-05
Zmynd10	-2.79826	5e-05
Gramd4	-2.79682	5e-05
Smad7	-2.79522	5e-05
Ifngr2	-2.79424	5e-05
Ralgps2	-2.78766	5e-05
Tbx6	-2.78457	5e-05
Csrnp2	-2.78242	5e-05
Xylt1	-2.77826	5e-05
Lgmn	-2.77444	5e-05
Col11a2	-2.77219	5e-05
Zfp773	-2.76051	5e-05
Fam65b	-2.7512	5e-05
Pdk2	-2.74461	5e-05
B3gnt4	-2.74049	0.03635
Fam117a	-2.7398	5e-05
Ssh2	-2.73436	5e-05
Acvr1b	-2.72803	5e-05
Amz1	-2.7247	5e-05
Cd40lg	-2.72268	5e-05
Pltp	-2.71375	5e-05
Smagp	-2.71135	0.0007
3830403N18Rik	-2.70312	5e-05
Frat2	-2.70178	5e-05
F2rl1	-2.70157	5e-05
Btg1	-2.69522	5e-05
Ppp1r13b	-2.68712	5e-05
Ccdc114	-2.68208	5e-05
Bsn	-2.68207	5e-05
Sp6	-2.67793	5e-05
Epas1	-2.66717	5e-05
Cxcr4	-2.65882	5e-05
Rreb1	-2.65744	5e-05
Epb4.1l1	-2.64978	5e-05
Serpinf2	-2.64374	0.0004
Cnga1	-2.64301	5e-05
Cmah	-2.64091	5e-05
Bcl9l	-2.63082	5e-05
Irgc1	-2.63021	0.0023
Usp28	-2.62944	5e-05
Kdm6b	-2.62256	5e-05
Dcun1d4	-2.61384	5e-05
Dnajb2	-2.59453	5e-05
Syde2	-2.58626	5e-05
Camkk1	-2.58527	5e-05
Impg2	-2.57097	5e-05
Hsph1	-2.5654	5e-05
Dapk1	-2.56141	5e-05
Sbk1	-2.55867	5e-05
Tnfrsf25	-2.54881	5e-05
Nr1d2	-2.54282	5e-05
Cpm	-2.54077	5e-05
Dusp10	-2.53745	5e-05
Otud1	-2.52238	5e-05
Gfod2	-2.51642	5e-05
Jhdm1d	-2.51089	5e-05
Hsd17b1	-2.50981	0.0029
Cnksr3	-2.50782	5e-05
Etv5	-2.50775	5e-05
Txk	-2.50631	5e-05
Ctsk	-2.50264	0.00215
Vmn2r96	-2.50173	5e-05
Nfix	-2.49219	5e-05
BC065397	-2.47392	5e-05
S100a8	-2.47223	5e-05
Card9	-2.46744	5e-05
Hs6st1	-2.46577	5e-05
1810034E14Rik	-2.45734	5e-05
Fry	-2.45509	5e-05
Axin2	-2.45452	5e-05
Srsf12	-2.44355	5e-05
Tmc3	-2.4431	5e-05
Map3k9	-2.44119	5e-05
Per2	-2.43778	5e-05
Cd40	-2.4277	0.00235
Tmcc3	-2.41011	5e-05
Slc6a19	-2.40787	5e-05
Phyhd1	-2.40651	5e-05
Cdk5r1	-2.40479	5e-05
Pyroxd2	-2.40368	5e-05
Chrna2	-2.39307	5e-05
Sema4b	-2.38566	5e-05
Zhx2	-2.38471	5e-05
Gm8221	-2.38115	5e-05
Pik3ip1	-2.38016	5e-05
Fam110b	-2.3721	0.00075
Rnf122	-2.36822	5e-05
Afp	-2.36529	5e-05
Usp53	-2.3631	5e-05
Slc25a29	-2.36159	5e-05
Rab3ip	-2.36119	5e-05
2210010C17Rik	-2.35975	5e-05
Aqp3	-2.35946	5e-05
Chad	-2.35705	0.00095
Bend4	-2.3555	5e-05
Kif1b	-2.34743	5e-05
A430088P11Rik	-2.34653	5e-05
Prpf40b	-2.34282	5e-05
Pam	-2.33941	5e-05
Ctsl	-2.33863	5e-05
Lrrc24	-2.33786	5e-05
Ccdc117	-2.33376	5e-05
Arl5c	-2.32874	5e-05
Klhl24	-2.32439	5e-05
Plekha1	-2.32392	5e-05
4930481A15Rik	-2.32134	5e-05
Tagap	-2.3209	5e-05
Rragd	-2.32084	5e-05
Mst1	-2.31582	5e-05
Lef1	-2.30639	5e-05
Ephx1	-2.30593	5e-05
Itga5	-2.30522	5e-05
Gprasp1	-2.30477	5e-05
Il11ra1	-2.30459	5e-05
Abtb2	-2.30222	5e-05
Map4k3	-2.29829	5e-05
Itfg3	-2.29562	5e-05
6330512M04Rik	-2.29425	5e-05
Elovl7	-2.28354	5e-05
Cd302	-2.28275	0.00025
Fos	-2.28115	5e-05
Nfe2l3	-2.27441	5e-05
Bbc3	-2.27289	5e-05
Socs3	-2.26936	5e-05
Slc17a9	-2.26697	5e-05
Gpx3	-2.266	0.0055
Klk7	-2.2521	0.00445
Galnt6	-2.2468	5e-05
Matk	-2.24674	5e-05
Cyp2r1	-2.24104	5e-05
Ramp3	-2.23923	5e-05
Cdr2l	-2.23504	5e-05
Atp10d	-2.2314	5e-05
Plcb2	-2.23003	5e-05
4921525O09Rik	-2.22369	5e-05
5730508B09Rik	-2.2229	5e-05
Ly86	-2.22135	5e-05
Aldh3b1	-2.21685	0.00195
Rpl39l	-2.21581	0.00205
Usp6nl	-2.207	5e-05
Slfn5	-2.20636	5e-05
Id3	-2.2059	5e-05
Dapl1	-2.20561	5e-05
Slc25a27	-2.20014	5e-05
Hhex	-2.19548	0.00045
Zfp874b	-2.17787	5e-05
Arhgap39	-2.16895	5e-05
Tgfb1i1	-2.16891	5e-05
Zfp811	-2.16678	5e-05
Dcdc2b	-2.16464	5e-05
4931403E22Rik	-2.16359	0.00985
Abhd15	-2.16263	5e-05
Traf4	-2.15968	5e-05
Slc7a7	-2.15896	5e-05
Doc2g	-2.15729	5e-05
Steap3	-2.15051	5e-05
Unc5cl	-2.15044	5e-05
Jmy	-2.14789	5e-05
A430078G23Rik	-2.14344	5e-05
Pak1	-2.14312	5e-05
Lonrf1	-2.13959	5e-05
Mdn1	-2.13933	5e-05
2310042D19Rik	-2.13841	5e-05
1700058G18Rik	-2.1381	0.0134
2013-03-01	-2.13533	5e-05
Acer2	-2.13498	5e-05
Nat14	-2.13243	5e-05
Rnf32	-2.13212	5e-05
Begain	-2.13035	5e-05
Tnfrsf12a	-2.11815	5e-05
Hmgn1	-2.10854	5e-05
Plp1	-2.10836	5e-05
BC051537	-2.10832	5e-05
Sqrdl	-2.10484	5e-05
C1qa	-2.10404	5e-05
Smad5	-2.10397	5e-05
Fbxo10	-2.10163	5e-05
B230216N24Rik	-2.10109	0.0205
Adam4	-2.09896	5e-05
E130304F04Rik	-2.0974	5e-05
Macf1	-2.09732	5e-05
D930016D06Rik	-2.09667	5e-05
Rab11fip4	-2.09491	5e-05
Prdm11	-2.09471	5e-05
1190002H23Rik	-2.0916	5e-05
Plekhg2	-2.09116	5e-05
Btbd11	-2.08897	5e-05
Gadd45a	-2.08609	5e-05
Bckdhb	-2.08409	5e-05
Pygm	-2.07988	5e-05
Siah1a	-2.07588	5e-05
Mast4	-2.07153	5e-05
Timm8a2	-2.06806	0.01175
Plekha7	-2.06704	5e-05
Dennd3	-2.06514	5e-05
Pag1	-2.06089	5e-05
Pgap1	-2.05729	5e-05
Gli1	-2.05723	5e-05
Slc25a23	-2.05694	5e-05
Fcgr2b	-2.05638	0.0001
2900005J15Rik	-2.05629	5e-05
Tlr9	-2.04718	5e-05
L3mbtl3	-2.04429	5e-05
Gpd1l	-2.04012	5e-05
Dnahc17	-2.03945	5e-05
B930003M22Rik	-2.03757	5e-05
Aldh1l1	-2.03659	5e-05
Dstyk	-2.03175	5e-05
Ciita	-2.0288	5e-05
Tacc2	-2.02781	5e-05
Gpr182	-2.0264	0.00355
Egfl8	-2.0253	5e-05
Zfp658	-2.02476	5e-05
Sh2d4b	-2.0247	0.00865
Ckap4	-2.01994	5e-05
Klhl4	-2.01598	5e-05
Pou2af1	-2.01549	5e-05
Rasgrp2	-2.01525	5e-05
Atp13a2	-2.01238	5e-05
Lmo2	-2.01203	5e-05
Pdcd4	-2.01011	5e-05
Tob1	-2.00855	5e-05
Snx30	-2.00601	5e-05
Klhdc1	-2.00472	5e-05
6430706D22Rik	2.00203	5e-05
Cln6	2.0022	5e-05
Psmc3ip	2.00276	5e-05
Ntng2	2.00625	5e-05
Rnaseh2b	2.00962	5e-05
Zcchc3	2.01046	5e-05
Fam92a	2.01154	5e-05
Ribc1	2.01205	5e-05
Pfkp	2.01483	5e-05
Stag3	2.01991	5e-05
Ulbp1	2.02238	5e-05
Npdc1	2.02302	5e-05
Fbxo36	2.02427	5e-05
Cyp51	2.02657	5e-05
2410004P03Rik	2.03376	5e-05
Lst1	2.03397	5e-05
Ikzf2	2.03454	5e-05
BC052040	2.03515	5e-05
6720489N17Rik	2.03847	5e-05
Bmpr1a	2.0402	5e-05
Unc119	2.04613	5e-05
Mapk3	2.04684	5e-05
Ccdc141	2.04715	5e-05
1810014F10Rik	2.05151	5e-05
Ier3	2.05478	5e-05
Nqo2	2.05681	5e-05
Ppm1j	2.0578	5e-05
Opn3	2.05867	5e-05
Hpdl	2.06061	0.00025
Icam5	2.06104	5e-05
Klhl23	2.06168	5e-05
Hif1a	2.06253	5e-05
Paqr4	2.06529	5e-05
Enpp2	2.06725	5e-05
Rsph3b	2.07377	5e-05
3010026O09Rik	2.07407	5e-05
Nenf	2.07626	5e-05
Bcl2l1	2.07698	5e-05
Repin1	2.07923	5e-05
Slfn9	2.08062	5e-05
Nt5e	2.08103	5e-05
Wdhd1	2.08236	5e-05
Tmem91	2.08665	0.00815
Cabp4	2.08772	0.003
Chaf1b	2.08808	5e-05
Ttf2	2.08832	5e-05
Ica1l	2.08833	5e-05
Cdk6	2.08983	5e-05
1700001L05Rik	2.09037	5e-05
Fam57a	2.09067	5e-05
Slc6a8	2.09079	5e-05
Rbm3	2.09257	5e-05
Ckap5	2.09288	5e-05
Sytl2	2.0976	5e-05
Slc15a1	2.09855	5e-05
6720463M24Rik	2.1023	5e-05
Gbp10	2.10576	5e-05
Unc13a	2.10628	5e-05
Fhl2	2.11072	5e-05
Pfkl	2.11339	5e-05
Gm8817	2.1148	5e-05
Slc35e4	2.11845	5e-05
Ddah2	2.12055	5e-05
Phf11	2.12598	5e-05
Ctsf	2.1282	5e-05
Sh3bgrl	2.13051	5e-05
Lrdd	2.13106	5e-05
Rap2a	2.13373	5e-05
Suv39h2	2.13753	5e-05
Rd3	2.13817	5e-05
Orc6	2.13829	5e-05
Tmprss3	2.14038	5e-05
Rilpl2	2.14154	5e-05
Tuba1c	2.1428	5e-05
Rnf19b	2.14836	5e-05
Myadm	2.15768	5e-05
Dok4	2.16134	5e-05
Aplp1	2.16222	5e-05
Rgs1	2.1628	5e-05
Tenc1	2.16405	5e-05
Ehd4	2.16858	5e-05
Podnl1	2.16909	5e-05
Olfr920	2.17567	5e-05
Cep72	2.17644	5e-05
Acsbg1	2.18224	5e-05
Igf2bp3	2.18426	5e-05
Dip2a	2.1866	5e-05
Rasl11a	2.19112	0.02435
Six5	2.19202	5e-05
Klf10	2.19434	5e-05
Blm	2.19724	5e-05
Rbpj	2.19858	5e-05
Myo1f	2.1988	5e-05
Pcyox1l	2.1991	5e-05
Myo5a	2.20088	5e-05
Pbx3	2.2017	5e-05
Chpt1	2.20173	5e-05
Zfp939	2.20578	0.00055
Rfc5	2.20801	5e-05
Angptl4	2.20858	5e-05
Abcb10	2.20889	5e-05
Csf1	2.21072	5e-05
Prrg4	2.21379	5e-05
Hspb6	2.2146	5e-05
B4galnt4	2.21565	5e-05
BC046404	2.21583	5e-05
Tnfsf14	2.21664	5e-05
0610040B10Rik	2.21706	0.024
Capn3	2.2172	5e-05
Ptprs	2.2211	5e-05
4930550C14Rik	2.22505	0.02315
Nlgn2	2.22578	5e-05
Dclre1a	2.23051	5e-05
Hmgn2	2.23067	5e-05
Mtap7d3	2.23126	5e-05
4933404O12Rik	2.23185	5e-05
Slc7a5	2.23248	5e-05
Tubb4a	2.23415	5e-05
4930534B04Rik	2.23627	5e-05
Siva1	2.23701	5e-05
Cpxm1	2.23892	0.00015
Cpa3	2.24431	0.0051
Rnf216	2.2473	5e-05
Gpc1	2.2513	5e-05
Fam162a	2.25367	5e-05
Nudt2	2.25484	5e-05
Alms1	2.25552	5e-05
Abi2	2.2583	5e-05
D330028D13Rik	2.25905	5e-05
9330179D12Rik	2.25997	5e-05
Tfdp1	2.26036	5e-05
Plxnb2	2.26131	5e-05
Tnf	2.26202	5e-05
C8g	2.26369	5e-05
Pex11c	2.2672	5e-05
Pcbp4	2.26801	5e-05
Pkn3	2.26827	5e-05
Kcnk6	2.27035	5e-05
Rgs12	2.27216	5e-05
Mapk8ip1	2.28186	5e-05
Nphp4	2.28425	5e-05
Mrgpre	2.28528	5e-05
Dfna5	2.28786	5e-05
Srd5a1	2.28802	5e-05
Tnni3	2.28886	0.00485
Tnfrsf18	2.29128	5e-05
Cobll1	2.29176	5e-05
Prr13	2.29448	5e-05
Hist1h4i	2.29812	5e-05
Gem	2.29816	5e-05
Cox6b2	2.29832	5e-05
Wdpcp	2.30032	5e-05
Med12l	2.3012	5e-05
Btbd8	2.3038	5e-05
9130206I24Rik	2.30493	5e-05
Adssl1	2.30762	5e-05
Wdr34	2.31156	5e-05
Sh2d5	2.31222	5e-05
Mtbp	2.31252	5e-05
Pgm2	2.31329	5e-05
Apol7b	2.31634	5e-05
Cdca7	2.31797	5e-05
Rab26	2.3241	0.0056
Sap30	2.32718	5e-05
Fam132a	2.3302	5e-05
Mocos	2.33182	5e-05
Dynlt1a	2.33376	5e-05
Pqlc3	2.34305	5e-05
Odc1	2.34333	5e-05
Srgap3	2.34368	5e-05
Ssx2ip	2.34567	5e-05
Zfp768	2.35105	5e-05
Glis2	2.35497	5e-05
Stard6	2.35735	5e-05
Lancl2	2.35884	5e-05
Mms22l	2.35919	5e-05
Bcl2l2	2.36099	5e-05
Ropn1l	2.36183	0.0037
Grhpr	2.36197	5e-05
Rfc4	2.36459	5e-05
Pla2g4c	2.36665	5e-05
1500010J02Rik	2.37128	5e-05
Susd3	2.37254	5e-05
Cpne2	2.37891	5e-05
Cryz	2.3803	5e-05
1700097N02Rik	2.38041	5e-05
Ccdc112	2.38195	5e-05
Zranb3	2.38378	5e-05
Pex11a	2.38444	0.02215
Gng3	2.38552	5e-05
Dsn1	2.39536	5e-05
Gpr62	2.39578	0.0102
Gpx7	2.39655	5e-05
Megf11	2.39735	5e-05
Pmf1	2.40127	5e-05
Slc5a11	2.40246	5e-05
Clic4	2.40721	5e-05
Bbs12	2.40893	5e-05
Gm996	2.40933	5e-05
Ng23	2.41095	5e-05
Cd44	2.41157	5e-05
Rbm20	2.41203	5e-05
Prim2	2.41354	5e-05
Psat1	2.41626	5e-05
4933436C20Rik	2.41868	0.017
Irf5	2.41981	5e-05
Plxdc1	2.42377	5e-05
Zfp367	2.42621	5e-05
Fen1	2.42684	5e-05
Camk2n2	2.42741	0.00055
Prdm1	2.42778	5e-05
Gm5523	2.43734	0.00105
Wdr62	2.44108	5e-05
Prim1	2.44164	5e-05
Dnalc1	2.44225	5e-05
Nt5dc2	2.44247	5e-05
Apln	2.44687	5e-05
A730008H23Rik	2.44735	5e-05
2410022L05Rik	2.45021	0.00415
Tmem106a	2.45349	5e-05
Padi3	2.45359	5e-05
Igsf10	2.45444	5e-05
Mlf1ip	2.45462	5e-05
Gm1976	2.45564	5e-05
Klre1	2.45845	5e-05
Tspan4	2.4595	5e-05
Acadl	2.46976	5e-05
4930579G24Rik	2.47248	5e-05
Cxcl10	2.47566	5e-05
Arhgap21	2.47595	5e-05
Gm5506	2.47979	5e-05
Lxn	2.482	5e-05
Acvr1	2.48827	5e-05
Il3ra	2.49026	5e-05
Prdm5	2.49155	0.00095
Aebp1	2.49485	0.0004
Tnfsf9	2.49629	5e-05
Eno1	2.49857	5e-05
Myo3b	2.50099	5e-05
Chchd10	2.50991	5e-05
C3	2.51454	5e-05
4930422G04Rik	2.51719	5e-05
Otos	2.52197	0.00025
Cysltr2	2.52373	5e-05
Ly6i	2.53086	5e-05
Ryr3	2.53136	5e-05
Gzmk	2.53505	5e-05
1810055G02Rik	2.53599	5e-05
Fam164a	2.53643	5e-05
Adam15	2.537	5e-05
Sh3yl1	2.54206	5e-05
Phldb1	2.54709	5e-05
Srcrb4d	2.54884	5e-05
4930599N23Rik	2.54973	0.00725
Ercc6l	2.54986	5e-05
Plxnd1	2.55107	5e-05
Wdr95	2.56065	5e-05
Carhsp1	2.56469	5e-05
Dram1	2.57109	0.0005
Slc39a4	2.57283	5e-05
Rfc3	2.5731	5e-05
Pafah1b3	2.57506	5e-05
Tmem51	2.57527	5e-05
1700042O10Rik	2.57748	0.00115
Zfp473	2.57983	5e-05
Wdr67	2.58278	5e-05
Mcm5	2.58295	5e-05
Mettl7a1	2.58374	5e-05
Pion	2.5866	5e-05
Nek4	2.58763	5e-05
Gm9199	2.58981	5e-05
Rora	2.59824	5e-05
Atp10a	2.59899	5e-05
Acot11	2.60135	5e-05
Ifi27l2a	2.61173	5e-05
Clec4d	2.62148	0.0052
Cldn12	2.62378	5e-05
St3gal2	2.6249	5e-05
6330403K07Rik	2.62661	5e-05
Ldlr	2.62807	5e-05
Prss30	2.62976	5e-05
Kif23	2.63094	5e-05
Myo1e	2.63446	5e-05
6720401G13Rik	2.63669	5e-05
Necab3	2.63671	5e-05
Ppfibp1	2.63728	5e-05
Unc93b1	2.64128	5e-05
Atpif1	2.64243	5e-05
Vim	2.64372	5e-05
Als2cr4	2.64779	5e-05
Ctnna1	2.64928	5e-05
Dhdh	2.64981	5e-05
Samd3	2.65071	5e-05
1700048O20Rik	2.65571	5e-05
Trim46	2.6575	5e-05
Myo10	2.66698	5e-05
AW555464	2.67024	5e-05
Kcnq5	2.67287	5e-05
Kif20b	2.67401	5e-05
Yes1	2.67486	5e-05
Egln3	2.67847	5e-05
Sdc3	2.67913	5e-05
Pgam1	2.67948	5e-05
Tnfrsf4	2.68026	5e-05
Fam33a	2.68042	5e-05
Hemk1	2.68304	5e-05
Irf8	2.69302	5e-05
Gm5465	2.70211	5e-05
Gcnt2	2.70285	5e-05
Stx11	2.70608	5e-05
A930041C12Rik	2.70643	0.0044
Abhd4	2.71127	5e-05
Rgag4	2.71215	5e-05
Thrb	2.71519	5e-05
Ppp2r3a	2.71594	5e-05
Sestd1	2.72269	5e-05
Fbxw8	2.7239	5e-05
Rnf43	2.72839	5e-05
Galk1	2.7296	5e-05
Ccdc50	2.73112	5e-05
Wisp3	2.73326	0.0043
Smc2	2.7484	5e-05
Lamb3	2.74919	5e-05
Fanca	2.75193	5e-05
Hist1h2bg	2.75891	0.01445
Serhl	2.76195	5e-05
Gnaq	2.76643	5e-05
Ifitm3	2.76956	5e-05
Glrx	2.77144	5e-05
Trim36	2.77452	5e-05
Pola1	2.77551	5e-05
Shisa2	2.77863	5e-05
Kmo	2.77879	5e-05
Ift122	2.78052	5e-05
1700029G01Rik	2.78927	5e-05
Pkm2	2.79205	5e-05
Fam132b	2.79222	5e-05
Smtnl2	2.80613	5e-05
Gm13375	2.80656	5e-05
Lsr	2.81387	5e-05
Morn2	2.8142	0.0033
Pck2	2.81432	5e-05
Rps4y2	2.81896	5e-05
Eea1	2.81933	5e-05
Hspa2	2.81994	5e-05
Grn	2.82316	5e-05
Aldoa	2.82457	5e-05
Dut	2.82471	5e-05
Fah	2.82552	5e-05
Spata24	2.82618	5e-05
Txn1	2.82872	5e-05
Gcnt1	2.82995	5e-05
Atp1b2	2.84225	0.00035
Atg9b	2.84257	5e-05
Arl11	2.84812	0.01215
Ptgdr	2.85084	5e-05
Car5b	2.85879	5e-05
C530028O21Rik	2.85892	5e-05
Gm9895	2.86416	0.00675
Akr1c12	2.86581	5e-05
Ms4a4c	2.86582	5e-05
Pkig	2.86866	5e-05
Syngr4	2.87091	0.00935
Ccdc123	2.87556	5e-05
Zfp41	2.8757	5e-05
Pbx4	2.87648	5e-05
Tbc1d7	2.88259	5e-05
Ly6c2	2.88705	5e-05
Cercam	2.89059	5e-05
Bcl2a1b	2.89301	5e-05
Cecr6	2.89517	5e-05
Pde4a	2.89539	5e-05
St6galnac6	2.89828	5e-05
Ociad2	2.90616	5e-05
Cyb561	2.90641	5e-05
Tipin	2.90755	5e-05
Ikbip	2.90916	5e-05
Brca2	2.91209	5e-05
1700040L02Rik	2.91339	5e-05
Fbxo5	2.92382	5e-05
Rilpl1	2.92404	5e-05
Aqp9	2.92755	5e-05
Clnk	2.93957	0.0116
Tmem97	2.94493	5e-05
Gpr56	2.94979	5e-05
Iigp1	2.9526	5e-05
Tmem107	2.95628	5e-05
Igfbp6	2.9607	0.0049
Pdgfb	2.96781	5e-05
Maged2	2.96917	5e-05
Setbp1	2.9695	5e-05
Sowahc	2.97523	5e-05
Irf4	2.98081	5e-05
Cd38	2.98867	5e-05
Gbp11	2.98915	5e-05
Cd300lf	2.9942	5e-05
Gen1	2.99877	5e-05
Bzrap1	2.99917	5e-05
Adarb1	3.00327	5e-05
Il17rd	3.00394	5e-05
Cd63	3.0064	5e-05
Tctex1d2	3.00698	5e-05
Tspan2	3.01187	5e-05
Gucy1b3	3.01221	5e-05
Lad1	3.013	5e-05
Mcm8	3.02076	5e-05
B230217C12Rik	3.02101	0.00125
H2afx	3.02197	5e-05
Klrc2	3.02258	5e-05
Gadd45g	3.02798	5e-05
Naip2	3.03507	5e-05
Ccdc34	3.03761	5e-05
Osgin1	3.04169	5e-05
BC018242	3.0435	5e-05
Celf5	3.04428	5e-05
Sdc4	3.04502	5e-05
Mapk12	3.04988	5e-05
Scd2	3.05469	5e-05
Il12rb1	3.06344	5e-05
Optn	3.07165	5e-05
Tmem220	3.07273	0.0073
Spnb3	3.07313	5e-05
Kifc5b	3.07544	5e-05
Gpr179	3.07821	5e-05
Atxn7l1	3.0819	5e-05
Tmem67	3.08239	5e-05
Ezh2	3.08278	5e-05
Atad5	3.08471	5e-05
Capn5	3.08671	5e-05
F2rl2	3.08731	5e-05
Kctd17	3.0916	5e-05
Chtf18	3.09334	5e-05
Gm11110	3.09605	5e-05
Lmtk3	3.10027	5e-05
Kpna2	3.10369	5e-05
BC055324	3.11084	5e-05
Id2	3.1233	5e-05
Eif4ebp1	3.12331	5e-05
Arntl2	3.12412	0.00115
Palm	3.12465	5e-05
Kank3	3.12734	5e-05
Itih5	3.12742	5e-05
Polq	3.12918	5e-05
Pcdhgc3	3.1293	5e-05
Bex1	3.13612	0.0056
Cacnb3	3.14021	5e-05
Cd160	3.1448	5e-05
Fnip2	3.14887	5e-05
Itga1	3.15221	5e-05
2210403K04Rik	3.1574	5e-05
Prdx4	3.16648	5e-05
1110067D22Rik	3.17385	5e-05
Nqo1	3.17585	0.0001
Sqle	3.18082	5e-05
4930427A07Rik	3.18085	5e-05
Fanci	3.18303	5e-05
4632434I11Rik	3.19277	5e-05
Cxcr3	3.19752	5e-05
Pilrb2	3.20093	5e-05
Hipk4	3.20265	0.00095
Tbx21	3.20339	5e-05
Ifi204	3.21507	5e-05
Poc1a	3.21667	5e-05
Itga2	3.21885	5e-05
Rbm44	3.22165	5e-05
Cenpl	3.22271	5e-05
Klrb1f	3.22592	5e-05
Dusp4	3.22645	5e-05
Asf1b	3.2268	5e-05
Mx1	3.23236	5e-05
Recql4	3.23316	5e-05
Cks2	3.23323	5e-05
Cox6a2	3.23405	0.01785
9330159M07Rik	3.24042	5e-05
4833419F23Rik	3.2472	5e-05
Cchcr1	3.24808	5e-05
Scpep1	3.24906	5e-05
Mfsd2a	3.25055	5e-05
Tm4sf5	3.26427	0.006
Reep1	3.26445	5e-05
Tubb6	3.27014	5e-05
Fut7	3.27229	5e-05
Cela1	3.27394	0.00595
Napsa	3.27408	5e-05
Plekhg4	3.27629	5e-05
Arl6	3.27721	5e-05
Sord	3.27733	5e-05
Plekhf1	3.2824	5e-05
Ikzf4	3.28701	5e-05
Gm5177	3.28882	0.0007
8430427H17Rik	3.29012	5e-05
Tbc1d2	3.29275	5e-05
Gm12070	3.30171	5e-05
Camk2n1	3.3088	5e-05
Gnb5	3.31397	5e-05
E2f2	3.32363	5e-05
4930486L24Rik	3.32574	5e-05
Cdkl2	3.33008	5e-05
Apbb1	3.33654	5e-05
Spata7	3.33839	5e-05
Lmnb1	3.34664	5e-05
Itpka	3.35451	0.0001
Lix1l	3.35827	5e-05
Capg	3.35945	5e-05
Spry1	3.36557	5e-05
Gapdh	3.37074	5e-05
Fbxo48	3.37136	5e-05
Ctnnbip1	3.37187	5e-05
Slc29a4	3.37287	0.0008
Csda	3.38564	5e-05
Prnp	3.38666	5e-05
Fam78b	3.38742	5e-05
Dhfr	3.38769	5e-05
Cd200r1	3.38912	5e-05
Acot7	3.38914	5e-05
Plk4	3.39123	5e-05
Plp2	3.39351	5e-05
Gpr55	3.40237	5e-05
Cox7a1	3.40365	0.0065
Fggy	3.40482	5e-05
Rrm1	3.40515	5e-05
Sccpdh	3.40725	5e-05
2010300C02Rik	3.40735	5e-05
Ndrg4	3.41506	5e-05
Nr4a2	3.44922	5e-05
Brip1	3.46333	5e-05
Sema6b	3.46569	5e-05
Rhoc	3.46777	5e-05
Gm13293	3.47031	0.00465
E2f1	3.4717	5e-05
Pacsin3	3.47242	0.00055
Bcam	3.48423	5e-05
Asph	3.48669	5e-05
Pole	3.48756	5e-05
Trpv4	3.4893	0.00065
Fam72a	3.48954	5e-05
Ston1	3.49271	0.004
Kif18a	3.49311	5e-05
Slc9a5	3.49445	5e-05
Ccdc99	3.4973	5e-05
Tmem25	3.50262	0.0001
Hells	3.50862	5e-05
Dscc1	3.51019	5e-05
Aph1b	3.51155	5e-05
Pxmp2	3.51528	5e-05
Tyms	3.51632	5e-05
Jazf1	3.51948	5e-05
Incenp	3.52709	5e-05
Fbxo44	3.53325	5e-05
Axl	3.54131	5e-05
Ppap2c	3.54192	5e-05
Hmgn3	3.54745	5e-05
Amdhd1	3.56067	0.0001
Nfil3	3.56661	5e-05
Rem2	3.57007	0.00555
Nrbp2	3.57099	5e-05
Rnase4	3.57196	0.0154
Il18rap	3.57298	5e-05
Cyfip1	3.57424	5e-05
9030625A04Rik	3.57793	5e-05
Ncapd2	3.58485	5e-05
5430427O19Rik	3.58571	5e-05
Plekhg3	3.59137	5e-05
2610318N02Rik	3.59367	5e-05
Cpd	3.59817	5e-05
Hist1h2ag	3.60103	0.0047
Tcf19	3.60166	5e-05
Bard1	3.60471	5e-05
Impa2	3.60796	5e-05
Kif24	3.6189	5e-05
Zfp941	3.6241	0.00065
Anxa4	3.62511	5e-05
Traip	3.6258	5e-05
Pter	3.6276	5e-05
Nid2	3.63155	0.00015
Gins1	3.63819	5e-05
Fam69b	3.65638	5e-05
Pgk1	3.65709	5e-05
Trib3	3.65852	5e-05
Kcnk7	3.66164	5e-05
Fam161a	3.66195	5e-05
Rasgef1a	3.66208	5e-05
Lig1	3.66425	5e-05
Hdhd3	3.66962	0.0035
Wee1	3.67442	5e-05
Ticam2	3.68415	5e-05
Gmnn	3.69277	5e-05
Slc7a3	3.70006	5e-05
Whsc1	3.7003	5e-05
Ogfrl1	3.70643	5e-05
Arhgdig	3.70644	5e-05
Cenpa	3.72086	5e-05
Mad2l1	3.72807	5e-05
Apitd1	3.73427	5e-05
4831426I19Rik	3.74475	5e-05
Slc15a3	3.74541	5e-05
Anxa9	3.74948	5e-05
Ncs1	3.7536	5e-05
Ppap2a	3.76885	0.0005
Ccdc40	3.77013	5e-05
Slc35f5	3.77586	5e-05
Ier5l	3.77616	5e-05
Tspan17	3.77945	0.00295
Ankrd35	3.78228	0.0003
Fam129a	3.78292	5e-05
Stk39	3.78678	5e-05
Klrk1	3.78998	5e-05
Gzma	3.79121	5e-05
Msr1	3.79258	0.0037
Asb2	3.80013	5e-05
Litaf	3.80052	5e-05
5730409E04Rik	3.80115	5e-05
Egfl7	3.80351	5e-05
Zeb2	3.80468	5e-05
Casp3	3.81836	5e-05
Capsl	3.82267	0.0029
Tube1	3.82407	5e-05
Gas2	3.82669	5e-05
B4galt4	3.83293	5e-05
Ndc80	3.83574	5e-05
Tmem180	3.83685	5e-05
2900041M22Rik	3.83705	5e-05
Myl4	3.84739	5e-05
Gpt2	3.84888	5e-05
Rnf208	3.86539	0.0004
D2Ertd750e	3.87368	5e-05
St6galnac2	3.87802	5e-05
Ccl4	3.88611	5e-05
Gabarapl1	3.88907	5e-05
Casp1	3.90232	5e-05
Dna2	3.90308	5e-05
Clec12a	3.90477	5e-05
Cenpw	3.92271	5e-05
Hmgb2	3.92309	5e-05
Cdkn2c	3.92474	5e-05
Ell2	3.92501	5e-05
Tmbim1	3.93641	5e-05
Cd93	3.96538	5e-05
Nmral1	3.96605	5e-05
Tlr4	3.97925	5e-05
Krt18	3.98525	0.0026
Aoah	3.9854	0.00285
Vash1	4.00017	5e-05
Runx2	4.00047	5e-05
Fam19a3	4.00341	5e-05
1110032F04Rik	4.00524	5e-05
Coro2a	4.00629	5e-05
9530077C05Rik	4.00633	5e-05
Atcay	4.00767	5e-05
Ccr1	4.01997	5e-05
2700099C18Rik	4.02181	5e-05
Gpr34	4.02231	5e-05
A930038C07Rik	4.02443	5e-05
4930506M07Rik	4.03431	5e-05
Gm8369	4.03977	5e-05
Ptms	4.05055	5e-05
Lrfn4	4.0513	5e-05
Ltbp4	4.05402	5e-05
Ly6c1	4.05754	5e-05
Svip	4.05767	0.0003
Naip5	4.06079	5e-05
Plek	4.06411	5e-05
Gm14005	4.0696	5e-05
Syt5	4.07672	0.00275
Slc6a9	4.08904	5e-05
Gm17745	4.09224	5e-05
E130303B06Rik	4.1053	5e-05
Hist1h2ae	4.1063	0.0026
Cd244	4.11065	5e-05
Arhgap11a	4.11296	5e-05
Rsph9	4.11765	0.00015
Kdelc2	4.12453	5e-05
Mctp1	4.12545	0.00015
Gpm6b	4.14313	5e-05
Nhedc2	4.14675	0.0001
Dcxr	4.14982	5e-05
Ly6a	4.15527	5e-05
Slc1a4	4.15798	5e-05
Slc35d3	4.16035	5e-05
Smyd1	4.16816	5e-05
Nphp1	4.17339	5e-05
Dpep2	4.17386	0.0026
Pdcd1lg2	4.18175	5e-05
Syce2	4.19483	5e-05
Oscp1	4.195	5e-05
Itpripl2	4.1974	5e-05
Entpd1	4.20509	5e-05
Slc12a8	4.20847	5e-05
Nbl1	4.21115	0.0026
Fam129b	4.21193	5e-05
Tmem2	4.21326	5e-05
Kif5a	4.2165	5e-05
Tg	4.22216	5e-05
Mybl1	4.22277	5e-05
Pon3	4.22366	5e-05
Myl6b	4.23206	0.00015
F830016B08Rik	4.23432	5e-05
Rgs9	4.23712	0.00025
Eme1	4.25518	5e-05
Tex15	4.25974	5e-05
Parvb	4.26196	0.0026
Ston2	4.26822	5e-05
Mtap9	4.2727	5e-05
Dusp3	4.28322	5e-05
Ctla2a	4.28355	5e-05
Kifc1	4.28682	5e-05
Ptger2	4.29173	5e-05
Vsig10	4.29374	5e-05
Lamc1	4.29381	5e-05
Mnda	4.30006	0.0026
Slc25a24	4.31044	5e-05
Gpnmb	4.32706	5e-05
Dusp9	4.33568	0.0026
Inppl1	4.33747	5e-05
Lrrk1	4.34197	5e-05
Gas2l1	4.34518	5e-05
B9d1	4.34588	0.0001
Pcgf2	4.35585	5e-05
Dmwd	4.36304	5e-05
Gpr141	4.36761	5e-05
Slamf7	4.37377	5e-05
C030034L19Rik	4.37529	5e-05
Brca1	4.39372	5e-05
Gucy1a3	4.3953	5e-05
Phactr2	4.41079	5e-05
Ptgr1	4.41221	5e-05
Tmem231	4.41576	5e-05
Pros1	4.42748	5e-05
Zwilch	4.44125	5e-05
Ccrl2	4.44611	5e-05
Nrp1	4.45126	5e-05
Aifm2	4.45337	0.00425
Ccdc18	4.46672	5e-05
Eps8	4.47876	0.0026
Anubl1	4.49479	5e-05
Uhrf1	4.49698	5e-05
6430571L13Rik	4.51112	5e-05
Csrp2	4.51424	5e-05
Pnp2	4.51951	0.0026
Rad51l1	4.5225	5e-05
Ptprj	4.52502	5e-05
Plekhh3	4.52589	0.0026
2010002N04Rik	4.5358	5e-05
Serpinb6a	4.53997	5e-05
Ifi44	4.54249	5e-05
Hmgb3	4.54992	5e-05
Pak6	4.5536	5e-05
Tmem163	4.55929	5e-05
Osbpl1a	4.56206	5e-05
Pask	4.56409	5e-05
Cdc45	4.58058	5e-05
Fabp5	4.58125	5e-05
Arhgap33	4.58637	5e-05
Nkain1	4.59254	0.0001
2610021K21Rik	4.5946	5e-05
Nid1	4.60399	5e-05
Mybl2	4.60991	5e-05
Cenpn	4.61415	5e-05
Ptpn13	4.61863	5e-05
E130306D19Rik	4.62719	5e-05
Spire1	4.63872	5e-05
Irg1	4.64645	0.0026
Nsl1	4.65698	5e-05
Tacc3	4.6599	5e-05
Pik3ap1	4.66353	5e-05
Gab2	4.68355	5e-05
Endod1	4.69022	5e-05
Cenpk	4.699	5e-05
Nupr1	4.7005	0.0026
Hk2	4.70227	5e-05
4930428O21Rik	4.70665	0.0026
Gcat	4.70822	5e-05
Chrm4	4.71422	5e-05
Exo1	4.71666	5e-05
Smpdl3b	4.72107	5e-05
Ltk	4.74565	5e-05
Tpi1	4.74571	5e-05
BC068157	4.75075	5e-05
Ect2	4.75571	5e-05
Arhgap19	4.75998	5e-05
Cish	4.76738	5e-05
Arhgef9	4.76892	0.0001
Ankrd29	4.7727	5e-05
Phf19	4.78219	5e-05
Ccne2	4.79015	5e-05
Rgs18	4.79759	0.0001
Prr5	4.79902	5e-05
Cks1b	4.80783	5e-05
1190002F15Rik	4.81028	5e-05
Cdca2	4.81147	5e-05
Cenph	4.81405	5e-05
Rnf144b	4.81612	0.0001
Ccdc57	4.82247	0.0026
Il18	4.83211	5e-05
Kif22	4.83321	5e-05
Aurka	4.8381	5e-05
Tjp2	4.84925	5e-05
Foxm1	4.86497	5e-05
Chek1	4.87238	5e-05
Hic1	4.87769	5e-05
P2ry12	4.87782	0.0004
Gins2	4.88518	5e-05
Ifitm1	4.88954	5e-05
Synpo	4.90802	5e-05
Casp4	4.91925	5e-05
Ccl3	4.9209	5e-05
Ifng	4.92604	5e-05
BC048355	4.93433	5e-05
Slc22a15	4.96275	5e-05
C330027C09Rik	4.96399	5e-05
Cntln	4.97055	5e-05
Raph1	4.97583	5e-05
Diap3	4.98184	5e-05
Spc25	4.982	5e-05
1110046J04Rik	4.98656	0.0008
Adap1	4.98874	5e-05
Slc2a6	4.9974	5e-05
Hpse	5.00035	5e-05
Prss16	5.00083	5e-05
Nlrp3	5.00923	0.0001
Ncaph	5.0217	5e-05
Atp2b4	5.02235	5e-05
Car13	5.02427	0.0001
Dyrk3	5.02535	5e-05
B3galt5	5.02685	5e-05
Dixdc1	5.02989	5e-05
Syngr3	5.03768	0.0001
Bnip3	5.03815	5e-05
Stmn1	5.04028	5e-05
Plk2	5.04801	5e-05
Ckap2	5.05127	5e-05
Slco4a1	5.05459	5e-05
Il12rb2	5.05677	5e-05
Flywch2	5.06205	0.0026
Phlda3	5.0662	5e-05
Lgals1	5.07215	5e-05
Slc43a3	5.07588	5e-05
Tigit	5.07763	5e-05
Anxa2	5.08213	5e-05
Gm17762	5.08659	0.02975
Ltb4r1	5.102	0.0026
Atf3	5.11029	0.0026
Orc1	5.11637	5e-05
Tnfrsf9	5.12827	5e-05
Irak1bp1	5.12879	5e-05
D430020J02Rik	5.13579	5e-05
Cenpi	5.14002	5e-05
Ctla2b	5.15288	5e-05
Pdcd1	5.1568	5e-05
Anxa1	5.16452	5e-05
Naip6	5.17979	5e-05
Echdc2	5.18345	5e-05
S100a1	5.18719	5e-05
Rad54b	5.19942	5e-05
Hcn2	5.20514	0.01115
Mtap1a	5.21015	0.00035
Aldoc	5.2113	5e-05
Chaf1a	5.21218	5e-05
Dlgap5	5.23151	5e-05
Pygl	5.23355	5e-05
Nebl	5.24197	5e-05
Tnp2	5.24703	5e-05
Cdc20	5.25116	5e-05
4930431P03Rik	5.26453	5e-05
Fam54a	5.26526	5e-05
Crmp1	5.26724	5e-05
Fancd2	5.27878	5e-05
Zbtb7b	5.29704	5e-05
Cdc6	5.31648	5e-05
2013-03-08	5.32146	5e-05
1700025K23Rik	5.33204	0.0026
Rnf152	5.33418	0.00125
P4ha2	5.36861	5e-05
Fut4	5.38227	5e-05
Prr5l	5.38733	5e-05
H1f0	5.39226	5e-05
Cenpp	5.39395	5e-05
Rnf128	5.39651	5e-05
Pik3r6	5.40893	0.0161
S100a4	5.43856	5e-05
Gtse1	5.46068	5e-05
Soat2	5.469	5e-05
Oaf	5.4768	0.0026
Pcdhgc5	5.48054	0.02455
Dscam	5.4866	5e-05
Rad51ap1	5.50122	5e-05
Rtkn2	5.50381	0.0001
Bst1	5.5166	0.0026
Tmem159	5.51901	5e-05
Mdfic	5.52995	5e-05
Farp1	5.54926	5e-05
Fignl1	5.55028	5e-05
Klra5	5.55524	5e-05
Tnfsf13b	5.56034	5e-05
Gatm	5.57155	5e-05
B430319G15Rik	5.58734	0.0126
Rgs16	5.59091	5e-05
Dkkl1	5.62809	0.0001
S100a6	5.63436	5e-05
Emilin2	5.63686	5e-05
Spry2	5.63735	5e-05
Trip13	5.63969	5e-05
Kit	5.64299	5e-05
Ugt1a7c	5.65803	5e-05
Bcl2a1d	5.65955	5e-05
D630045J12Rik	5.66024	0.00155
Cdca8	5.673	5e-05
Clspn	5.69678	5e-05
Kdm4d	5.70185	0.0026
Jdp2	5.71913	5e-05
Mnd1	5.73686	0.0026
Ankle1	5.76496	5e-05
Naaladl1	5.77153	0.0026
St14	5.77396	5e-05
Adam8	5.77544	5e-05
Ccnf	5.79408	5e-05
Arhgef25	5.79554	0.0001
Cenpm	5.80898	5e-05
Inha	5.81911	0.0026
Plod2	5.82845	5e-05
Nrgn	5.83121	5e-05
Pilrb1	5.83714	0.0001
Xkr5	5.86066	5e-05
Hmmr	5.8667	5e-05
Plk1	5.8786	5e-05
Spc24	5.88596	5e-05
Xcl1	5.88807	5e-05
Morn4	5.90027	0.0026
5730590G19Rik	5.90185	5e-05
Mis18bp1	5.91388	5e-05
Ccr5	5.92207	5e-05
Kcnk5	5.92806	5e-05
Itga7	5.9304	5e-05
Dtl	5.93139	5e-05
Oip5	5.93499	5e-05
Rad54l	5.93775	5e-05
Cdca5	5.97486	5e-05
Klrc1	5.97817	5e-05
P2ry14	5.9799	5e-05
Rad51	6.0017	5e-05
Havcr2	6.03363	5e-05
Lancl3	6.03534	0.0026
2810030E01Rik	6.0362	0.0026
Alcam	6.0443	5e-05
Sema4c	6.06593	0.0001
Smtn	6.08179	5e-05
Anln	6.0922	5e-05
Actr3b	6.10457	5e-05
2610002D18Rik	6.10518	5e-05
Tuba8	6.10645	0.0026
1500009L16Rik	6.12339	5e-05
Socs2	6.13351	5e-05
Kif20a	6.13362	5e-05
Cit	6.1422	5e-05
Kntc1	6.14778	5e-05
Fam20a	6.15317	5e-05
Prelid2	6.16038	5e-05
Ncald	6.17118	5e-05
Ifitm2	6.17145	5e-05
Metrnl	6.17147	5e-05
Lrr1	6.17428	5e-05
Fam83d	6.19695	5e-05
Prc1	6.19928	5e-05
Gucy2e	6.20047	0.0026
Uchl1	6.20691	5e-05
Chst2	6.20881	5e-05
Dio2	6.21125	0.0026
Ncapg2	6.22201	5e-05
Sgol2	6.22561	5e-05
Fsbp	6.25019	0.01275
Tjp1	6.2509	0.00295
Nuf2	6.2516	5e-05
Neurl1b	6.26156	5e-05
Tgm2	6.29976	5e-05
Cdca3	6.3025	5e-05
Mlkl	6.31516	5e-05
Clip3	6.32405	0.0026
Cenpe	6.3495	5e-05
Hip1	6.37015	5e-05
Gm4841	6.38222	5e-05
Zbtb32	6.38563	5e-05
Specc1	6.39113	5e-05
Casc5	6.40458	5e-05
Cdkn3	6.40674	5e-05
Rrm2	6.43439	5e-05
Gls2	6.44419	0.0279
Osbpl3	6.44935	5e-05
Top2a	6.4609	5e-05
Tnfsf11	6.4678	5e-05
F630043A04Rik	6.47313	5e-05
Rab27b	6.47653	5e-05
Trp73	6.53089	0.0012
Ltbp3	6.53706	0.03845
Ccna2	6.5673	5e-05
Fgl2	6.58158	5e-05
Gstt3	6.59224	5e-05
Mcm10	6.60897	5e-05
Grtp1	6.61895	0.0002
Serpinb9b	6.62747	0.0026
Batf3	6.6385	0.0026
Tk1	6.64414	5e-05
Fasl	6.6455	5e-05
Stc2	6.66841	5e-05
Ncapg	6.67253	5e-05
Wdr54	6.68854	0.0026
Cdk14	6.69493	0.0001
Mastl	6.71422	5e-05
Lgals3	6.71885	5e-05
Sema6d	6.72251	5e-05
Sgol1	6.72475	5e-05
Fam84a	6.74005	0.0026
Pkd2	6.74595	0.0026
Prr11	6.76752	5e-05
Cetn4	6.77585	0.0026
Gas2l3	6.78211	5e-05
Mki67	6.79052	5e-05
Bub1b	6.81956	5e-05
Dapk2	6.82261	5e-05
Mxd3	6.853	5e-05
E2f8	6.86424	5e-05
Slc16a3	6.87005	5e-05
Serpina3g	6.88095	5e-05
Lilrb4	6.88633	5e-05
Pcdhgc4	6.88719	0.00085
Ctla4	6.90423	5e-05
Vegfa	6.91232	5e-05
Emp1	6.91278	5e-05
Ak4	6.93399	5e-05
2810442I21Rik	6.93589	0.0026
Plxdc2	6.95591	5e-05
Gm4951	6.95715	5e-05
Ccnb2	6.99601	5e-05
Kif4	7.01093	5e-05
2810417H13Rik	7.01219	5e-05
Ryk	7.03434	5e-05
Ckap2l	7.04845	5e-05
Kif15	7.0488	5e-05
Esco2	7.06383	5e-05
Il2ra	7.0643	5e-05
4930583H14Rik	7.07165	5e-05
Plscr1	7.07877	5e-05
Birc5	7.08398	5e-05
Ccr2	7.09763	5e-05
Ttk	7.098	5e-05
Thbs1	7.11277	0.0026
Ebi3	7.11309	5e-05
Tnip3	7.1298	0.0026
Psrc1	7.14478	5e-05
4930547N16Rik	7.14934	5e-05
Kif11	7.15644	5e-05
Cdk1	7.17152	5e-05
Rab39b	7.17799	0.0026
Galnt3	7.18717	5e-05
Stil	7.22056	5e-05
Espl1	7.24299	5e-05
Cep55	7.24383	5e-05
Gp49a	7.24968	5e-05
Cdc25c	7.25242	5e-05
Scin	7.25386	0.0005
Pcyt1b	7.33079	5e-05
Bhlhe40	7.36789	5e-05
Lrrc49	7.40333	0.0066
Melk	7.40563	5e-05
Klri2	7.42092	5e-05
Tpx2	7.4321	5e-05
Bub1	7.43893	5e-05
Troap	7.45847	5e-05
Aspm	7.46156	5e-05
Kif14	7.46686	5e-05
Bcat1	7.46792	5e-05
E2f7	7.49396	5e-05
Cenpf	7.5115	5e-05
Serpina3f	7.51214	5e-05
Nusap1	7.55972	5e-05
Ube2c	7.56343	5e-05
Neil3	7.56546	5e-05
Hemgn	7.58753	0.0026
BC030867	7.59777	5e-05
Gzmc	7.62492	5e-05
Shcbp1	7.6423	5e-05
Zdhhc2	7.64468	5e-05
Depdc1a	7.65828	5e-05
Bspry	7.66757	5e-05
Lag3	7.68336	5e-05
Pif1	7.71193	5e-05
D630039A03Rik	7.7153	5e-05
Plscr4	7.72678	0.0001
Nek2	7.75704	5e-05
Dlg2	7.76256	0.0002
Ccnb1	7.77495	5e-05
Aurkb	7.81046	5e-05
Kif18b	7.8299	5e-05
Iqgap3	7.90905	5e-05
Spag5	7.93295	5e-05
Mcf2l	7.95121	0.0027
Mpp2	7.95309	0.0026
Pbk	7.98053	5e-05
Kif2c	8.04689	5e-05
Ska1	8.05125	5e-05
Gzmb	8.20641	5e-05
Cables1	8.20979	5e-05
Ptpn3	8.33916	5e-05
Stk32c	8.41788	0.0012
Cd80	8.46032	0.0026
Asns	8.47206	5e-05
Lif	8.57794	5e-05
Ttc39c	8.59757	5e-05
AA467197	8.71355	5e-05
2010317E24Rik	8.7897	0.0026
Serpine2	8.8313	5e-05
Nrn1	9.06792	5e-05
Spp1	9.30291	0.0001
Cdkn1a	9.59949	0.0009
Mt1	9.61655	0.0026
Fam64a	9.7162	0.0001
Upp1	10.1101	0.0082

## Sheet: Nvs4
	2-fold change cut-off		Total genes: 1321
CuffDiff Analysis: Naïve vs Group 4
Gene	log2(fold_change)	p_value
Ccr9	-9.48837	5e-05
Slc16a5	-9.25601	5e-05
5830411N06Rik	-8.76961	0.00115
Ampd1	-8.39626	0.00265
Il6ra	-7.6282	5e-05
Dtx1	-7.59976	5e-05
Trnp1	-7.41502	0.0033
Sh3pxd2a	-7.3673	5e-05
Chst15	-7.0504	5e-05
Cd22	-6.70991	0.0004
Bai2	-6.69841	0.00755
Itgae	-6.56701	5e-05
Kcnh3	-6.50474	0.0236
Gabrr2	-6.5014	0.00265
Fam101b	-6.42408	5e-05
Atp1b1	-6.3993	5e-05
Cd163l1	-6.24028	5e-05
Igfbp4	-6.07854	5e-05
Spib	-5.96331	0.00265
S100a9	-5.94591	5e-05
Cd79a	-5.89646	5e-05
Cr2	-5.77603	0.00265
Tspan9	-5.68656	5e-05
G0s2	-5.65841	0.00265
Ksr2	-5.5994	0.00265
Rasgrp3	-5.57303	0.0298
Igj	-5.5479	5e-05
Grm6	-5.50891	0.00265
Plekha6	-5.47247	5e-05
Sox4	-5.46419	5e-05
Abca1	-5.4381	5e-05
Nfam1	-5.43362	5e-05
Adam6b	-5.38781	5e-05
Spsb1	-5.35191	5e-05
1810006J02Rik	-5.31623	0.00265
Rgmb	-5.26846	5e-05
Timp2	-5.24369	5e-05
Lbp	-5.13366	5e-05
Pdlim4	-5.13145	5e-05
She	-5.08977	5e-05
Rcn3	-5.06041	5e-05
Camk2a	-4.97182	5e-05
Ggt1	-4.91729	5e-05
Ggt5	-4.86752	5e-05
Wdfy4	-4.84699	5e-05
Sox13	-4.82801	0.00265
Dock4	-4.76882	5e-05
H2-Aa	-4.76087	5e-05
Xkrx	-4.73035	5e-05
Galnt10	-4.6969	5e-05
Cnn3	-4.5771	5e-05
AI646023	-4.56438	5e-05
Siglecg	-4.51332	5e-05
Man1c1	-4.51039	5e-05
Cyp2d22	-4.50301	5e-05
Ampd3	-4.50265	5e-05
Ttc28	-4.47914	5e-05
Maged1	-4.41336	5e-05
Zdhhc14	-4.4089	5e-05
Cd24a	-4.39697	5e-05
Nhsl1	-4.39413	5e-05
Sh3tc1	-4.31411	5e-05
Emid1	-4.29896	5e-05
Afap1	-4.27437	5e-05
Amigo2	-4.27343	5e-05
Plcb4	-4.24282	5e-05
Gria3	-4.22313	5e-05
Kcnj16	-4.16196	5e-05
Zfp318	-4.15176	5e-05
S100a8	-4.09551	5e-05
Tle1	-4.06997	5e-05
Kcna2	-4.06782	5e-05
Nrp2	-4.05688	5e-05
Pik3c2b	-4.04193	5e-05
Fcgrt	-4.0333	5e-05
Faim3	-4.02896	5e-05
Snn	-4.01019	5e-05
Ptk2	-3.99529	5e-05
Acvrl1	-3.96287	5e-05
Dntt	-3.9402	5e-05
Vipr1	-3.92712	5e-05
Shb	-3.91789	5e-05
Plat	-3.85136	0.00025
D8Ertd82e	-3.8498	5e-05
Gm128	-3.84773	0.0028
Jup	-3.84726	5e-05
Laptm4b	-3.83533	5e-05
4921515J06Rik	-3.80562	0.01195
Rnase6	-3.79218	0.0033
Zcchc12	-3.7882	0.00035
Gm10818	-3.75201	0.0047
Cxxc5	-3.75147	5e-05
Slc16a10	-3.71049	5e-05
Cyp4f18	-3.70704	0.0033
St6gal1	-3.68733	5e-05
Plbd1	-3.67521	0.0033
2610019F03Rik	-3.67389	5e-05
Scg5	-3.67237	0.0003
Nacc2	-3.66599	5e-05
Dnajc6	-3.64932	5e-05
Ankrd55	-3.63655	5e-05
Adrb2	-3.63572	5e-05
Tmem108	-3.61396	5e-05
Mical3	-3.5759	5e-05
Tdrkh	-3.55157	5e-05
Slc27a6	-3.55134	5e-05
Dusp7	-3.54465	5e-05
Gm12505	-3.5354	5e-05
Ramp1	-3.52121	5e-05
Rab4a	-3.51311	5e-05
C630004H02Rik	-3.51107	5e-05
Rgs10	-3.50208	5e-05
Kcnh2	-3.49257	5e-05
Hs3st3b1	-3.49039	5e-05
Syk	-3.48219	5e-05
Sorcs2	-3.47776	5e-05
Celsr2	-3.47763	5e-05
Pnck	-3.477	0.00065
1700061G19Rik	-3.45298	0.00505
Lman1l	-3.43381	5e-05
Sipa1l2	-3.41613	5e-05
Arhgap29	-3.41469	5e-05
Tmie	-3.41409	5e-05
Lgmn	-3.39741	5e-05
Boll	-3.33031	5e-05
Adcy6	-3.31592	5e-05
Glt8d2	-3.31022	5e-05
Zfp2	-3.30581	5e-05
Trib2	-3.28544	5e-05
Cd40lg	-3.27367	5e-05
Ptpn14	-3.2703	5e-05
Gprc5b	-3.2629	5e-05
B430306N03Rik	-3.25539	5e-05
Dok3	-3.25128	5e-05
Slpi	-3.23225	5e-05
Cxcr4	-3.20185	5e-05
Arhgap5	-3.18006	5e-05
H2-Eb1	-3.15774	5e-05
Rasal1	-3.14861	5e-05
Lyl1	-3.14108	0.0086
Syde1	-3.13917	5e-05
Fam110b	-3.13508	0.0067
Raver2	-3.12916	5e-05
Trat1	-3.10878	5e-05
Syde2	-3.10742	5e-05
As3mt	-3.0914	5e-05
Wfikkn2	-3.09037	5e-05
Apobec2	-3.05933	5e-05
Etv5	-3.05359	5e-05
Cd79b	-3.04321	5e-05
Rarg	-3.02281	5e-05
Efna2	-3.01893	0.0299
Gtf2ird1	-3.01037	5e-05
Rtn4rl1	-3.00137	5e-05
2210010C17Rik	-3.00106	5e-05
Tcp11	-2.9916	5e-05
Hist2h3c2	-2.99084	0.0007
Stx1a	-2.98697	5e-05
Mira	-2.98083	0.00835
Dapk1	-2.97153	5e-05
Gm10640	-2.96346	5e-05
Xylt1	-2.95713	5e-05
Gm15708	-2.95642	5e-05
Csf3r	-2.95436	5e-05
Cacnb1	-2.94766	5e-05
Plaur	-2.92838	5e-05
Rps6ka2	-2.92211	5e-05
BC057022	-2.92045	5e-05
Itga5	-2.92003	5e-05
Sgk1	-2.88309	5e-05
Amz1	-2.88096	5e-05
Klra7	-2.87716	0.0004
Lrrc23	-2.86077	5e-05
Xlr3b	-2.85227	5e-05
Trio	-2.84527	5e-05
3830403N18Rik	-2.84133	5e-05
Rbpms	-2.8333	5e-05
Adh1	-2.83008	0.0002
Arhgef11	-2.82306	5e-05
Ldlrap1	-2.80105	5e-05
Rftn2	-2.79699	5e-05
Klf3	-2.78696	5e-05
Nfe2l3	-2.78587	5e-05
Cd7	-2.78458	5e-05
Zfp879	-2.76927	5e-05
Nlrc4	-2.76551	5e-05
Ralgps2	-2.76248	5e-05
Nr1d1	-2.75478	5e-05
Olfr1033	-2.75044	5e-05
Cacna2d4	-2.74064	5e-05
Hsph1	-2.73575	5e-05
D17H6S56E-3	-2.73438	5e-05
Ckap4	-2.71318	5e-05
Sh2d4b	-2.71113	0.001
App	-2.70874	5e-05
Klf2	-2.68792	5e-05
Csrnp2	-2.67358	5e-05
Il6st	-2.66249	5e-05
Hsd11b1	-2.65686	5e-05
Hspa1b	-2.65132	5e-05
Zscan18	-2.64649	5e-05
Pam	-2.63321	5e-05
B930003M22Rik	-2.63222	0.0001
Peg13	-2.62753	5e-05
Gm10791	-2.62702	0.0346
Tnk2	-2.62415	5e-05
Pltp	-2.61908	5e-05
Pcbp3	-2.60261	5e-05
Als2cl	-2.59925	5e-05
Ifngr2	-2.59849	5e-05
Zfp811	-2.5978	0.0004
Ntrk3	-2.5948	5e-05
Steap3	-2.58011	5e-05
Gm4814	-2.57658	5e-05
Tcf7l1	-2.57604	5e-05
Tsc22d3	-2.57021	5e-05
Gm11346	-2.56494	5e-05
Fry	-2.55928	5e-05
Fgd2	-2.55029	5e-05
Begain	-2.5492	5e-05
Smagp	-2.54722	5e-05
Dirc2	-2.54019	5e-05
H2-Ob	-2.53386	5e-05
Hp	-2.52001	0.0024
Lmo2	-2.51885	5e-05
1700102P08Rik	-2.51737	5e-05
Btk	-2.51582	5e-05
Dusp10	-2.51376	5e-05
Mylip	-2.51066	5e-05
Ly86	-2.50379	5e-05
Cd74	-2.50294	5e-05
Mex3a	-2.48873	5e-05
Ssh2	-2.48733	5e-05
Plekho1	-2.48542	5e-05
Gfod2	-2.47505	5e-05
Cnr2	-2.45924	5e-05
Gpr146	-2.45386	5e-05
Rnf144a	-2.44925	5e-05
Zmynd10	-2.44368	5e-05
Actn1	-2.43616	5e-05
Map3k9	-2.43093	5e-05
Trim15	-2.43003	0.001
Cnksr3	-2.4238	5e-05
C1qtnf9	-2.4151	0.00075
Sbf2	-2.41153	5e-05
Vmn2r97	-2.41003	5e-05
Acvr1b	-2.40128	5e-05
Tgfbr3	-2.4006	5e-05
Enc1	-2.3974	5e-05
Epas1	-2.39227	5e-05
Hcn3	-2.39022	5e-05
Irf6	-2.388	5e-05
Cyp2r1	-2.38577	5e-05
Rab3ip	-2.38502	5e-05
Per2	-2.38122	5e-05
Klra23	-2.36377	0.0007
Nfix	-2.36005	5e-05
Ppp1r13b	-2.35105	5e-05
4933430H15Rik	-2.35064	5e-05
Ptpdc1	-2.34774	5e-05
Smad7	-2.34306	5e-05
Pacsin1	-2.34221	5e-05
Slc12a7	-2.33777	5e-05
Rapgef4	-2.33762	5e-05
2410066E13Rik	-2.32659	5e-05
Prpf40b	-2.3244	5e-05
Tcp11l2	-2.31745	5e-05
S1pr1	-2.31608	5e-05
Axin2	-2.31519	5e-05
Hsd17b1	-2.31172	0.0058
Ccin	-2.31153	0.00135
Slc3a1	-2.30634	5e-05
Chrna2	-2.30266	5e-05
Gpr97	-2.29873	5e-05
Spaca1	-2.29527	5e-05
Guca1b	-2.28961	5e-05
Nhlrc1	-2.28812	5e-05
Mmp15	-2.28754	5e-05
Sidt1	-2.28186	5e-05
Dcun1d4	-2.27981	5e-05
Slc25a29	-2.27683	5e-05
Amn	-2.27583	0.00555
Irgc1	-2.26397	0.0017
Trpm1	-2.26057	5e-05
Sema4b	-2.25859	5e-05
Clcf1	-2.25568	5e-05
Bcl9l	-2.24932	5e-05
Sbk1	-2.24715	5e-05
Abtb2	-2.24659	5e-05
Pdzd4	-2.24368	5e-05
Otud1	-2.23477	5e-05
Dennd3	-2.23458	5e-05
Nacad	-2.22138	5e-05
2013-03-01	-2.2142	5e-05
Ralgps1	-2.19816	5e-05
Bsn	-2.19483	5e-05
Pde2a	-2.19278	5e-05
Cpm	-2.19002	5e-05
2310042D19Rik	-2.18827	5e-05
Mmp17	-2.18808	5e-05
Aldh3b1	-2.18558	0.0022
Hmgn1	-2.17224	5e-05
Basp1	-2.16845	5e-05
Traf4	-2.16608	5e-05
Lphn1	-2.16154	5e-05
Sfpi1	-2.14939	5e-05
Cd55	-2.14781	5e-05
Cdk5r1	-2.14445	5e-05
Ctsh	-2.14323	5e-05
Cxcr5	-2.13977	5e-05
Gm11944	-2.13586	0.02245
Impg2	-2.13265	5e-05
Usp28	-2.13253	5e-05
Zfp36	-2.13114	5e-05
Ext1	-2.1175	5e-05
Nckap5l	-2.11722	5e-05
Itfg3	-2.11692	5e-05
Rab20	-2.11684	5e-05
Plekha1	-2.1168	5e-05
Chad	-2.11604	5e-05
D930028M14Rik	-2.11502	5e-05
Fbxo10	-2.11221	5e-05
Col23a1	-2.10934	5e-05
Cdr2l	-2.10911	5e-05
Tacc2	-2.10813	5e-05
Ccdc114	-2.10755	5e-05
Ciita	-2.1017	5e-05
Col11a2	-2.10088	5e-05
Tmcc3	-2.10067	5e-05
Ctsk	-2.08973	0.00055
Ube2cbp	-2.08343	5e-05
Gprasp1	-2.08285	5e-05
Gm5887	-2.07933	0.01195
Zbtb20	-2.07754	5e-05
Pag1	-2.07737	5e-05
Sfxn5	-2.07229	5e-05
Wfs1	-2.06428	5e-05
Zfp72	-2.06217	5e-05
Nr1d2	-2.05906	5e-05
Ccdc117	-2.0586	5e-05
Frat1	-2.05777	5e-05
B630019K06Rik	-2.05775	5e-05
Ahdc1	-2.05577	5e-05
Slc25a23	-2.05443	5e-05
Smurf2	-2.05431	5e-05
Slc7a7	-2.04633	5e-05
Slc46a1	-2.04556	0.0009
Tnfrsf12a	-2.0403	5e-05
Kif1b	-2.0348	5e-05
Lrrc24	-2.03024	5e-05
Hist2h3c1	-2.01841	5e-05
Camkk1	-2.01816	5e-05
Dnajb1	-2.01624	5e-05
Arhgap39	-2.01027	5e-05
Card9	-2.00929	5e-05
Dapl1	-2.00751	5e-05
Stx2	-2.00506	5e-05
Vmn2r96	-2.00487	5e-05
Rasgrf2	-2.00222	5e-05
Hhex	-2.00209	0.00015
1190002H23Rik	-2.0019	5e-05
Fam151b	2.00291	5e-05
Gpc1	2.00409	5e-05
Cks2	2.00572	5e-05
Gys1	2.00608	5e-05
Ctxn1	2.00883	5e-05
Ccdc112	2.01001	0.00015
Gm8817	2.01145	0.0001
Cmpk2	2.01414	5e-05
Fam71f2	2.01418	5e-05
Rgs11	2.01558	5e-05
Cln6	2.01668	5e-05
Fam72a	2.02152	5e-05
Wdr34	2.02265	5e-05
Aplp1	2.02315	5e-05
Ccdc123	2.02381	5e-05
Tipin	2.02476	5e-05
Dut	2.02772	5e-05
Unc13a	2.03062	5e-05
Tnf	2.03386	5e-05
Tmem97	2.03571	5e-05
Mrgpre	2.03979	5e-05
Cd101	2.04101	5e-05
Tbkbp1	2.04786	5e-05
Lmln	2.04809	5e-05
Csf1	2.04947	5e-05
Pfkp	2.04988	5e-05
Syngr4	2.05142	0.03055
Ppp2r3a	2.05369	5e-05
Brip1	2.05486	5e-05
Dennd4a	2.06187	5e-05
Ntng2	2.06282	5e-05
5330426P16Rik	2.0648	5e-05
Nlgn2	2.06742	5e-05
Gatsl3	2.06856	5e-05
Ccdc141	2.07424	5e-05
Gpr160	2.0755	5e-05
Pld2	2.07701	5e-05
Rap2a	2.07967	5e-05
Grina	2.08014	5e-05
Abcb10	2.08069	5e-05
Srcrb4d	2.0823	5e-05
Bard1	2.08241	5e-05
Sh2d5	2.08461	5e-05
Ezh2	2.08752	5e-05
Gpx7	2.08902	5e-05
Phldb1	2.08997	5e-05
Pear1	2.09045	5e-05
Slc4a7	2.091	5e-05
Atpif1	2.09402	5e-05
1700097N02Rik	2.09805	5e-05
Gm5523	2.09843	0.00325
Klf4	2.0997	5e-05
Il10ra	2.10186	5e-05
Atad5	2.10245	5e-05
Rrm1	2.10416	5e-05
Apln	2.10451	5e-05
1500012F01Rik	2.10659	5e-05
Poc1a	2.10741	5e-05
Mapk12	2.10759	5e-05
Cnih2	2.10856	5e-05
Traip	2.11067	5e-05
Pcbp4	2.1119	5e-05
Clec4d	2.11235	0.0148
Cd44	2.1128	5e-05
Ptprs	2.1312	5e-05
Phf11	2.13967	5e-05
Tyms	2.14022	5e-05
Angptl4	2.14149	5e-05
Six5	2.14544	5e-05
Clec12a	2.14664	5e-05
Pfkl	2.1492	5e-05
Fbxo48	2.1513	5e-05
Prrg4	2.15756	5e-05
Icam5	2.15887	5e-05
Myo1f	2.16083	5e-05
Ly96	2.16366	0.00015
Enpp2	2.16691	5e-05
Klf10	2.16762	5e-05
Wisp3	2.17229	0.0139
Lekr1	2.17349	5e-05
Nek4	2.17358	5e-05
Ppm1j	2.1754	5e-05
Optn	2.17596	5e-05
Cryz	2.17785	5e-05
Slc39a4	2.17927	5e-05
Rnf19b	2.17942	5e-05
1520402A15Rik	2.18407	5e-05
Gcnt2	2.18615	5e-05
Fam164a	2.18672	5e-05
Kcnk6	2.1868	5e-05
Mtap7d3	2.18773	5e-05
Acadl	2.188	5e-05
Oas1a	2.1883	5e-05
Gm13375	2.19223	5e-05
Med12l	2.19259	5e-05
Rnf216	2.19435	5e-05
Dok4	2.20376	5e-05
Hemk1	2.2061	5e-05
Ncapd2	2.2068	5e-05
Gm10658	2.20737	5e-05
Srgap3	2.20909	5e-05
Hpgds	2.21178	5e-05
Gpi1	2.21848	5e-05
Pex11c	2.21898	5e-05
Tmem91	2.21918	0.00625
Ahnak	2.22353	5e-05
Als2cr4	2.22527	5e-05
Nqo1	2.2271	0.0013
Tnfsf9	2.22782	5e-05
Ndrg2	2.23069	5e-05
Tnfsf14	2.23092	5e-05
Tmem106a	2.23415	5e-05
Fam65c	2.23493	5e-05
Arrdc4	2.23761	5e-05
Slc9a5	2.2401	5e-05
Fam162a	2.24207	5e-05
4930539E08Rik	2.24262	5e-05
Gas8	2.24646	5e-05
LOC100504703	2.24797	0.0022
Cchcr1	2.25079	5e-05
9330179D12Rik	2.25458	5e-05
Slc35e4	2.25506	5e-05
Ctnna1	2.25921	5e-05
Spata24	2.26132	5e-05
St6galnac2	2.27347	0.0005
Pqlc3	2.27365	5e-05
Myo1h	2.27515	5e-05
Gng3	2.27572	5e-05
Tctex1d2	2.27583	0.00045
Slc6a9	2.27839	0.00015
Ppfibp1	2.28033	5e-05
Lst1	2.28297	5e-05
Ikzf2	2.28561	5e-05
Tmem107	2.28564	5e-05
1700001L05Rik	2.28681	5e-05
Pole	2.29373	5e-05
Gzmk	2.29633	0.00015
Syt6	2.30252	5e-05
Kcnab3	2.30327	5e-05
Rsad2	2.3064	5e-05
Ndc80	2.3072	5e-05
Padi3	2.30995	5e-05
Il3ra	2.31052	5e-05
Chpt1	2.31357	5e-05
Aebp1	2.31672	0.00085
Tnfrsf4	2.32348	5e-05
Qrfp	2.33235	5e-05
Carhsp1	2.33253	5e-05
Prdm1	2.33324	5e-05
Rilpl2	2.33585	5e-05
1700042O10Rik	2.33685	0.0019
Stx11	2.33839	5e-05
Txn1	2.33992	5e-05
Mad2l1	2.34034	5e-05
Sowahc	2.34104	5e-05
Thrb	2.3423	5e-05
Plcxd1	2.34356	5e-05
Ier3	2.34709	5e-05
Cldn12	2.3489	5e-05
Glrx	2.35113	5e-05
A930041C12Rik	2.35187	0.00745
0610040B10Rik	2.35781	0.0176
Necab3	2.3585	5e-05
Igsf10	2.36172	5e-05
Maged2	2.36272	5e-05
2410006H16Rik	2.36316	5e-05
Mettl7a1	2.36328	5e-05
Slc7a3	2.36774	5e-05
Gins1	2.36795	5e-05
Plekhg3	2.36814	5e-05
Hist1h2bg	2.37177	0.02205
Apitd1	2.37292	5e-05
Gm15987	2.38541	0.00815
Olfr920	2.38763	5e-05
Dusp4	2.39531	5e-05
Irf8	2.39871	5e-05
Prr13	2.40057	5e-05
Gm129	2.40175	5e-05
Atp10a	2.40495	5e-05
Gm5506	2.40659	5e-05
Mocos	2.40804	5e-05
Dhdh	2.41074	5e-05
Ankrd37	2.41304	5e-05
Abhd4	2.41495	5e-05
Otos	2.4155	0.00025
Cyb561	2.42005	5e-05
Eno1	2.42006	5e-05
Lxn	2.42221	5e-05
Vim	2.42664	5e-05
Eea1	2.42856	5e-05
Dnalc1	2.42882	5e-05
Rora	2.43074	5e-05
Capn3	2.43404	5e-05
Prdx4	2.43537	5e-05
Bcl2l2	2.43653	5e-05
Tnfrsf18	2.43975	5e-05
Lig1	2.44701	5e-05
Mapk8ip1	2.44726	5e-05
Dhfr	2.44845	5e-05
Pgam1	2.45025	5e-05
Prss30	2.45402	5e-05
Cd300lf	2.45546	5e-05
Pgm2	2.45924	5e-05
Trim36	2.46361	5e-05
Tcf19	2.47113	5e-05
Aqp9	2.47263	5e-05
Cpd	2.47282	5e-05
Tbc1d4	2.47366	5e-05
Ms4a6d	2.47463	5e-05
Sqle	2.47498	5e-05
Il12rb1	2.47539	5e-05
Egfl7	2.48119	5e-05
Dscc1	2.4819	5e-05
Rnf43	2.4842	5e-05
Cysltr2	2.48526	5e-05
Irf5	2.48559	5e-05
Gm996	2.48795	5e-05
Pion	2.48935	5e-05
Gm9199	2.49073	5e-05
Fbxw8	2.49571	5e-05
Gcnt1	2.49929	5e-05
Rasl11a	2.50131	0.0156
6330403K07Rik	2.50947	5e-05
2610318N02Rik	2.51441	5e-05
Acsbg1	2.51458	5e-05
Myl10	2.518	5e-05
Ifitm3	2.52079	5e-05
Fam132a	2.52089	5e-05
Tbc1d7	2.52932	5e-05
Tspan4	2.5315	5e-05
Phlpp1	2.53329	5e-05
Tubb4a	2.54856	5e-05
Gpr56	2.55197	5e-05
Klre1	2.55333	5e-05
Unc93b1	2.55913	5e-05
Nipa1	2.56091	5e-05
Ifi204	2.56602	5e-05
Fah	2.56656	5e-05
1700048O20Rik	2.56786	5e-05
Grn	2.56856	5e-05
Pafah1b3	2.56912	5e-05
Pigz	2.57185	5e-05
Rbm20	2.57288	5e-05
Lamb3	2.57843	5e-05
Irf4	2.58331	5e-05
Tnni3	2.58525	0.00225
Lix1l	2.58844	5e-05
Gnaq	2.58941	5e-05
Cox6a2	2.5924	0.0277
Cpa3	2.59332	0.00225
Sh3yl1	2.59682	5e-05
6720401G13Rik	2.59903	5e-05
St6galnac6	2.60122	5e-05
AW555464	2.60387	5e-05
Eno2	2.60535	5e-05
Fam55d	2.60633	0.0002
2700099C18Rik	2.61154	5e-05
Serhl	2.61184	5e-05
Dram1	2.61232	0.00035
Ppap2a	2.61611	0.00335
Adam15	2.61723	5e-05
Kifc1	2.61793	5e-05
Gm16157	2.61953	5e-05
Cdkn2c	2.62049	5e-05
Gmnn	2.62256	5e-05
Yes1	2.62715	5e-05
Grhpr	2.6285	5e-05
Bzrap1	2.63113	5e-05
Ccdc50	2.63369	5e-05
Cenpa	2.63509	5e-05
Arhgap11a	2.64494	5e-05
Tube1	2.66386	5e-05
E2f1	2.66485	5e-05
Ndrg1	2.66532	5e-05
4930550C14Rik	2.66909	0.0125
Ifi27l2a	2.67041	5e-05
Eme1	2.67101	5e-05
Gpt2	2.67575	5e-05
Slc43a1	2.67737	5e-05
Pcdhgc3	2.68126	5e-05
Scd2	2.68593	5e-05
E2f2	2.68716	5e-05
Hells	2.69061	5e-05
Asb2	2.69191	5e-05
Egln3	2.70097	5e-05
8430427H17Rik	2.70353	5e-05
Sema6b	2.70737	5e-05
Pter	2.70967	5e-05
9030625A04Rik	2.71564	0.00015
Galk1	2.71669	5e-05
Tm4sf5	2.71867	0.0119
Whsc1	2.71906	5e-05
Cd160	2.71982	5e-05
Kcnq5	2.72141	5e-05
Mfsd2a	2.72197	5e-05
Cpxm1	2.72254	5e-05
Sccpdh	2.72671	5e-05
Megf11	2.72829	5e-05
Car5b	2.72909	5e-05
Gbp10	2.72981	5e-05
Akr1c12	2.73204	0.0001
Trim46	2.73778	5e-05
Tspan2	2.74026	5e-05
Apol7b	2.74562	5e-05
Prdm5	2.74861	0.00045
Ly6i	2.74974	5e-05
Bcl2a1b	2.74981	5e-05
Aurka	2.76132	5e-05
Wee1	2.76208	5e-05
Rilpl1	2.76962	5e-05
Tbx21	2.7697	5e-05
Bbs12	2.77087	5e-05
Pde4a	2.77945	5e-05
Gadd45g	2.78435	5e-05
Ift122	2.7854	5e-05
Cercam	2.78562	5e-05
BC018242	2.78861	5e-05
Ociad2	2.79356	5e-05
Arhgap19	2.79526	5e-05
Mybl1	2.79783	5e-05
Reep1	2.79931	5e-05
Kank3	2.81486	5e-05
Myo3b	2.81789	5e-05
Sdc3	2.819	5e-05
Itih5	2.81983	5e-05
Ikbip	2.82104	5e-05
Napsa	2.83401	5e-05
Pkm2	2.83754	5e-05
Morn2	2.84271	0.00325
Tmem51	2.84762	5e-05
Hmgn3	2.8528	5e-05
Adarb1	2.85307	5e-05
Itpka	2.86047	0.00035
Pbx4	2.8659	5e-05
Klrc2	2.87727	5e-05
Atxn7l1	2.8791	5e-05
Pdgfb	2.88077	5e-05
Acot7	2.88283	5e-05
Osgin1	2.88326	5e-05
Ticam2	2.88567	5e-05
Shisa2	2.8858	5e-05
Bcam	2.88706	5e-05
Dna2	2.88794	5e-05
B230217C12Rik	2.89094	0.0019
1700029G01Rik	2.89519	5e-05
Prnp	2.89784	5e-05
Arl6	2.9027	5e-05
D2Ertd750e	2.91523	5e-05
Fnip2	2.91813	5e-05
Aldoa	2.91928	5e-05
Wdr95	2.92172	5e-05
Tmem67	2.93017	5e-05
4831426I19Rik	2.93771	5e-05
Capg	2.94161	5e-05
Hmgb2	2.94929	5e-05
Itga2	2.94977	5e-05
Jazf1	2.95683	5e-05
Marco	2.9595	0.0091
Cacnb3	2.96791	5e-05
Oscp1	2.97567	5e-05
Samd3	2.97655	5e-05
E130306D19Rik	2.98648	5e-05
Cenpw	2.99001	5e-05
Cd200r1	2.99036	5e-05
Kctd17	2.99239	5e-05
Id2	2.99243	5e-05
Slc15a3	2.99585	0.0001
Zwilch	2.99656	5e-05
9530077C05Rik	2.99716	5e-05
1700040L02Rik	2.99791	5e-05
Dyrk4	3.00439	5e-05
Spata7	3.01006	5e-05
1700001G11Rik	3.01297	0.0376
Trib3	3.013	5e-05
Vash1	3.01987	5e-05
Nt5e	3.02664	5e-05
Rps4y2	3.03206	5e-05
Itga1	3.03841	5e-05
Cenpn	3.04177	5e-05
Ect2	3.04245	5e-05
E130303B06Rik	3.04268	5e-05
Cdca2	3.04335	5e-05
Eif4ebp1	3.04533	5e-05
Fam78b	3.04759	5e-05
Mybl2	3.05048	5e-05
Brca1	3.05168	5e-05
Ccdc18	3.05429	5e-05
Tmem25	3.05756	0.00025
2210403K04Rik	3.06869	5e-05
Cd38	3.07724	5e-05
Hdhd3	3.07734	0.0073
Tmem220	3.07911	0.0073
Nsl1	3.08228	5e-05
Slc1a4	3.08274	5e-05
Hist1h2bc	3.087	5e-05
Gnb5	3.09032	5e-05
Csda	3.09226	5e-05
Pxmp2	3.09542	5e-05
Atg9b	3.0969	5e-05
Palm	3.09889	5e-05
Rgag4	3.10007	5e-05
Tacc3	3.10955	5e-05
Gpr55	3.11819	5e-05
Hdac9	3.12268	5e-05
4930599N23Rik	3.12561	0.0025
Ms4a4c	3.1257	5e-05
Sord	3.1258	5e-05
Spc25	3.12839	5e-05
Cdc45	3.14104	5e-05
Axl	3.14595	5e-05
1110067D22Rik	3.15375	5e-05
Arhgap33	3.1594	5e-05
Ctnnbip1	3.16003	5e-05
Asph	3.18366	5e-05
Nkain1	3.18475	0.00085
Gpr179	3.18739	5e-05
Plp2	3.18867	5e-05
Gm12070	3.19092	5e-05
Foxm1	3.20198	5e-05
Kif22	3.21129	5e-05
Cela1	3.21204	0.00595
2610021K21Rik	3.21328	5e-05
Anubl1	3.21339	5e-05
Cadm1	3.21345	5e-05
Exo1	3.2198	5e-05
Ncs1	3.23283	5e-05
Scpep1	3.23586	5e-05
Ccr1	3.23886	0.0001
4833419F23Rik	3.24371	5e-05
Iigp1	3.24514	5e-05
Cks1b	3.25039	5e-05
Lgi4	3.25333	0.0008
Uhrf1	3.25578	5e-05
Tmem180	3.25621	5e-05
F2rl2	3.26141	5e-05
Pask	3.26454	5e-05
Nfil3	3.27186	5e-05
Coro2a	3.27488	5e-05
Cyfip1	3.28023	5e-05
Hist1h2ae	3.28884	0.0042
Pex11a	3.29643	0.00745
Naip2	3.29659	5e-05
Capn5	3.29722	5e-05
Ncaph	3.29944	5e-05
Fam54a	3.30952	5e-05
Litaf	3.31067	5e-05
Ccdc40	3.31162	5e-05
Celf5	3.31637	5e-05
Gas2	3.32705	5e-05
Gapdh	3.32717	5e-05
Rad51l1	3.32971	5e-05
Fut7	3.33119	5e-05
Smtnl2	3.34488	5e-05
Cxcr3	3.34493	5e-05
Gm9895	3.34843	0.00335
4930486L24Rik	3.3491	5e-05
Rnf208	3.36353	0.0008
Ndrg4	3.36587	5e-05
Lsr	3.36698	5e-05
2010300C02Rik	3.36799	5e-05
4930506M07Rik	3.37718	5e-05
Capsl	3.37785	0.00485
Arhgdig	3.37826	5e-05
Cdkl2	3.37997	5e-05
Hmgb3	3.38538	5e-05
Phf19	3.38898	5e-05
Ly6c2	3.38977	5e-05
Gm14005	3.39683	5e-05
Ier5l	3.39698	5e-05
Ptgr1	3.40295	5e-05
Nmral1	3.40296	5e-05
Dmwd	3.40354	5e-05
Fbxo44	3.40619	5e-05
Lmtk3	3.40871	5e-05
Nid2	3.41196	0.0002
Ikzf4	3.41665	5e-05
Ogfrl1	3.41692	5e-05
Nphp1	3.42413	5e-05
Fam161a	3.43134	5e-05
Cenpi	3.44237	5e-05
Rhoc	3.44806	5e-05
Casp3	3.45093	5e-05
Myl6b	3.4523	0.0008
Anxa4	3.45293	5e-05
Ccne2	3.45433	5e-05
Tmem2	3.45512	5e-05
Impa2	3.45745	5e-05
Klrb1f	3.45891	5e-05
Cenpk	3.46036	5e-05
Cenph	3.46461	5e-05
Zeb2	3.46494	5e-05
Ptgdr	3.47727	5e-05
C530028O21Rik	3.4785	5e-05
Zfp941	3.4791	0.00065
Stk39	3.48317	5e-05
Slc29a4	3.48792	0.0007
Gm11110	3.50109	5e-05
BC048355	3.51376	0.0001
Cox7a1	3.51715	0.0055
Ryr3	3.52055	5e-05
Diap3	3.52236	5e-05
Ston2	3.5251	5e-05
Cd244	3.53028	5e-05
Ckap2	3.53282	5e-05
C330027C09Rik	3.53361	5e-05
5430427O19Rik	3.53498	5e-05
Tspan17	3.53579	0.00345
Tg	3.53624	5e-05
Setbp1	3.53791	5e-05
Spry1	3.54633	5e-05
Fam69b	3.54643	5e-05
Pilrb2	3.54689	5e-05
Nupr1	3.54911	0.00345
Lrfn4	3.55649	5e-05
Atp7b	3.55803	0.0001
2900041M22Rik	3.56302	5e-05
Fancd2	3.57341	5e-05
Nr4a2	3.57588	5e-05
Mx1	3.58138	5e-05
Klrk1	3.58447	5e-05
Aph1b	3.59615	5e-05
Ell2	3.60577	5e-05
Pacsin3	3.6147	0.00045
Gas2l1	3.62187	5e-05
Amdhd1	3.625	5e-05
Ston1	3.62887	0.00355
Rad54b	3.63284	5e-05
Il18rap	3.64067	5e-05
Rgs9	3.64755	0.00045
Syce2	3.64953	5e-05
Gcat	3.65245	5e-05
Rnase4	3.66121	0.01445
Cdc20	3.67419	5e-05
Tex15	3.67906	5e-05
Gbp11	3.68105	5e-05
Fam129a	3.6843	5e-05
Tmem163	3.68949	5e-05
Fggy	3.68967	5e-05
Pgk1	3.69372	5e-05
Dlgap5	3.69801	5e-05
Nid1	3.69992	5e-05
Atcay	3.7017	5e-05
Slc35d3	3.70651	0.0001
Apbb1	3.70763	5e-05
B9d1	3.71866	0.0005
Prr5	3.72498	5e-05
Ptms	3.72999	5e-05
Stmn1	3.73442	5e-05
Kif5a	3.75255	5e-05
Pnp2	3.7568	0.00265
Slc35f5	3.76478	5e-05
B4galt4	3.76798	5e-05
Car13	3.76866	0.0005
Fam129b	3.76917	5e-05
Itpripl2	3.77646	5e-05
Pdcd1lg2	3.80102	5e-05
Gins2	3.80149	5e-05
Ctsf	3.80485	5e-05
Kdelc2	3.80541	5e-05
Fabp5	3.81346	5e-05
Dll1	3.81351	0.0029
Slc43a3	3.81572	5e-05
Gpnmb	3.82008	5e-05
Runx2	3.83229	5e-05
Plk1	3.83618	5e-05
Myl4	3.84682	5e-05
Phactr2	3.85202	5e-05
Gtse1	3.86244	5e-05
Plek	3.86356	5e-05
Ly6a	3.86373	5e-05
Ccnf	3.86941	5e-05
Pon3	3.886	5e-05
Rad51ap1	3.90157	5e-05
Gucy1b3	3.9037	5e-05
Cd93	3.90908	5e-05
Trip13	3.91121	5e-05
Anxa9	3.91567	5e-05
Dusp9	3.91572	0.00285
Chek1	3.92629	5e-05
Dcxr	3.93106	5e-05
Cecr6	3.93348	5e-05
Ankle1	3.9374	5e-05
Gab2	3.94003	5e-05
Ppap2c	3.94283	5e-05
Ly6c1	3.94592	5e-05
5730409E04Rik	3.94927	5e-05
1110032F04Rik	3.95513	5e-05
Gipc3	3.95803	0.0026
Flywch2	3.96346	0.0026
Camk2n1	3.9683	5e-05
Nrbp2	3.97758	5e-05
6430571L13Rik	3.98605	5e-05
Sdc4	3.99567	5e-05
Orc1	4.00354	5e-05
Rem2	4.01165	0.00275
Nrp1	4.01283	5e-05
Casp1	4.02303	5e-05
A930038C07Rik	4.02316	5e-05
Gpr34	4.02376	5e-05
Entpd1	4.02495	5e-05
Dusp3	4.02619	5e-05
Adap1	4.02914	5e-05
Cntln	4.03599	5e-05
Gabarapl1	4.03948	5e-05
Kcnk7	4.03979	5e-05
Ccl4	4.04126	5e-05
Chaf1a	4.04709	5e-05
Rgs18	4.05677	0.0001
Ptprj	4.06462	5e-05
1190002F15Rik	4.07271	5e-05
Rtkn2	4.09721	0.00015
Fam83d	4.10531	5e-05
Mnda	4.11177	0.0026
Smtn	4.12548	5e-05
Mis18bp1	4.13226	5e-05
Tmbim1	4.13491	5e-05
Fignl1	4.13501	5e-05
Lrrk1	4.13578	5e-05
Atf3	4.15027	0.0026
Slc25a24	4.15139	5e-05
Oaf	4.15464	0.0026
Hmmr	4.15568	5e-05
Lamc1	4.17245	5e-05
Ltbp4	4.17499	5e-05
Cdc6	4.17719	5e-05
Mtap9	4.17841	5e-05
Pcgf2	4.17955	5e-05
Tjp2	4.18356	5e-05
Cdca8	4.18919	5e-05
Hic1	4.19129	5e-05
D430020J02Rik	4.19482	5e-05
Spire1	4.19494	5e-05
Inppl1	4.20745	5e-05
Slc12a8	4.2116	5e-05
F830016B08Rik	4.21231	5e-05
Smpdl3b	4.2171	5e-05
Ctla2a	4.22076	5e-05
Aoah	4.22891	0.00265
Pros1	4.22953	5e-05
Pdcd1	4.23107	5e-05
Prc1	4.23665	5e-05
Gatm	4.24652	5e-05
Gpm6b	4.25107	5e-05
Fam19a3	4.25257	5e-05
Vsig10	4.26436	5e-05
Gm13293	4.27042	0.00255
Gzma	4.2868	5e-05
Clspn	4.2908	5e-05
Ccrl2	4.29685	5e-05
Tmem231	4.30022	5e-05
Cdca5	4.30096	5e-05
Smyd1	4.30209	5e-05
Xkr5	4.30243	5e-05
Gpr141	4.33559	5e-05
5730590G19Rik	4.34056	5e-05
Spc24	4.3485	5e-05
Ankrd35	4.34875	0.0001
Anln	4.35269	5e-05
Sgol2	4.35271	5e-05
Cit	4.35693	5e-05
Rnf144b	4.36276	0.0001
Cenpp	4.36788	5e-05
Gm17745	4.3815	5e-05
2010002N04Rik	4.38224	5e-05
Plk2	4.3961	5e-05
Tlr4	4.40643	5e-05
Naip5	4.40906	5e-05
Rsph9	4.42992	0.0001
Nhedc2	4.43328	0.0001
Irak1bp1	4.4407	5e-05
Serpinb6a	4.45067	5e-05
Hcn2	4.45316	0.01145
P2ry12	4.45748	0.0004
Nuf2	4.46706	5e-05
Slamf7	4.46773	5e-05
Raph1	4.46924	5e-05
Nrgn	4.47837	5e-05
Chrm4	4.47891	5e-05
Tnfrsf9	4.48791	5e-05
Rad54l	4.49016	5e-05
Ptpn13	4.49414	5e-05
2610002D18Rik	4.50987	5e-05
Aifm2	4.50994	0.0042
Kif20a	4.51063	5e-05
Cish	4.51357	5e-05
Slc2a6	4.52111	5e-05
Hk2	4.53828	5e-05
Rasgef1a	4.5543	5e-05
Klra5	4.55689	5e-05
Endod1	4.57407	5e-05
C030034L19Rik	4.57599	5e-05
Rad51	4.57796	5e-05
Kntc1	4.58081	5e-05
Nebl	4.58172	5e-05
Pcdhgc5	4.58766	0.02465
Gm8369	4.58988	5e-05
Oip5	4.59214	5e-05
Csrp2	4.59954	5e-05
Ifng	4.60026	5e-05
Slco4a1	4.6022	5e-05
Ccdc57	4.60276	0.0026
Fut4	4.60527	5e-05
Arhgef9	4.61303	0.0001
Slc22a15	4.62374	5e-05
Anxa2	4.62726	5e-05
Nbl1	4.62921	0.0026
Lgals1	4.63083	5e-05
Il18	4.63087	5e-05
4930428O21Rik	4.63354	0.0026
2013-03-08	4.63629	5e-05
Casc5	4.64287	5e-05
Gas2l3	4.64548	5e-05
Prss16	4.64739	5e-05
B3galt5	4.65446	5e-05
Hpse	4.66439	5e-05
F630043A04Rik	4.6899	5e-05
Lrr1	4.69656	5e-05
Dpep2	4.69852	0.0026
Top2a	4.70012	5e-05
Ccl3	4.70081	5e-05
Ccna2	4.70125	5e-05
Cenpm	4.72074	5e-05
Dyrk3	4.7296	5e-05
Tpi1	4.73165	5e-05
Pak6	4.73199	5e-05
Ltk	4.75318	5e-05
Dixdc1	4.76168	5e-05
Pik3ap1	4.76435	5e-05
Ifitm1	4.76978	5e-05
Ncapg2	4.7698	5e-05
Mctp1	4.77379	0.0001
Syt5	4.78235	0.0026
Il12rb2	4.7904	5e-05
Ankrd29	4.81065	5e-05
Prr5l	4.82525	5e-05
Neurl1b	4.82919	5e-05
Crmp1	4.8376	5e-05
Batf3	4.84307	0.0026
Xcl1	4.86564	5e-05
Mnd1	4.88158	0.0026
Phlda3	4.8856	5e-05
Cdca3	4.89655	5e-05
Rrm2	4.89814	5e-05
Gm17762	4.92336	0.02975
Dsg2	4.93566	0.0026
Gucy1a3	4.93635	5e-05
BC068157	4.95615	5e-05
Ltb4r1	4.96046	0.0026
Mastl	4.98563	5e-05
Synpo	4.99196	5e-05
Atp2b4	5.00522	5e-05
Ctla2b	5.01617	5e-05
Mxd3	5.0227	5e-05
Dtl	5.03438	5e-05
Ptger2	5.04003	5e-05
Zbtb7b	5.04815	5e-05
Prr11	5.04972	5e-05
1110046J04Rik	5.05234	0.0008
Tuba8	5.06139	0.0026
Mcm10	5.06665	5e-05
Tnp2	5.06948	5e-05
Anxa1	5.0849	5e-05
Casp4	5.08922	5e-05
Bnip3	5.09181	5e-05
Abi3bp	5.1063	5e-05
Soat2	5.10978	5e-05
Farp1	5.11433	5e-05
Dscam	5.12346	5e-05
Tigit	5.12803	5e-05
Bst1	5.13135	0.0026
Syngr3	5.13923	0.0001
Sgol1	5.14121	5e-05
Ugt1a7c	5.1646	5e-05
H1f0	5.1702	5e-05
Nlrp3	5.18347	0.0001
Cdk1	5.18487	5e-05
Bub1b	5.18893	5e-05
Ttk	5.23356	5e-05
Uchl1	5.23434	5e-05
Ncapg	5.23824	5e-05
Ifi44	5.25906	5e-05
E2f8	5.25937	5e-05
Tk1	5.27089	5e-05
Cdkn3	5.28886	5e-05
St14	5.29224	5e-05
Adam8	5.31562	5e-05
Pygl	5.3206	5e-05
Bcl2a1d	5.32259	5e-05
Spry2	5.32457	5e-05
P4ha2	5.33142	5e-05
Kif11	5.33346	5e-05
Cenpe	5.35244	5e-05
2810030E01Rik	5.35511	0.0026
Ckap2l	5.36351	5e-05
S100a4	5.37796	5e-05
Scin	5.39233	0.0005
1500009L16Rik	5.39285	5e-05
Espl1	5.39417	5e-05
Sema4c	5.39679	0.0001
Mki67	5.42054	5e-05
Dkkl1	5.42125	0.0001
P2ry14	5.42891	5e-05
Naip6	5.43205	5e-05
Fsbp	5.43267	0.01275
Kif4	5.43437	5e-05
Inha	5.4396	0.0026
Echdc2	5.44049	5e-05
S100a1	5.44138	5e-05
4930547N16Rik	5.45694	5e-05
Mdfic	5.45821	5e-05
Morn4	5.4692	0.0026
2810417H13Rik	5.47043	5e-05
Birc5	5.47415	5e-05
2810442I21Rik	5.47641	0.0026
Cdc25c	5.50452	5e-05
Tnfsf13b	5.50687	5e-05
Fam20a	5.51412	5e-05
Kif15	5.55114	5e-05
Rgs16	5.55438	5e-05
Kcnk5	5.55805	5e-05
Melk	5.56444	5e-05
Jdp2	5.57147	5e-05
Ifitm2	5.57386	5e-05
Emilin2	5.57409	5e-05
Esco2	5.58063	5e-05
B430319G15Rik	5.58298	0.0126
Stil	5.58601	5e-05
1700025K23Rik	5.5997	0.0026
Ncald	5.5998	5e-05
Tnfsf11	5.6022	5e-05
Mlkl	5.60702	5e-05
Kif14	5.61854	5e-05
Rnf152	5.62256	0.00125
Klrc1	5.63959	5e-05
Parvb	5.64045	0.0026
Nusap1	5.65775	5e-05
Havcr2	5.6747	5e-05
Hip1	5.6803	5e-05
Aspm	5.68653	5e-05
Socs2	5.69631	5e-05
Cep55	5.70326	5e-05
Arhgef25	5.70888	0.0001
Actr3b	5.71908	5e-05
S100a6	5.72765	5e-05
Tmem159	5.72973	5e-05
Rnf128	5.7361	5e-05
Plod2	5.73643	5e-05
Troap	5.74186	5e-05
Ccnb1	5.74518	5e-05
Iqgap3	5.75745	5e-05
Tgm2	5.75831	5e-05
Ccnb2	5.77034	5e-05
Pcdhgc4	5.78336	0.00085
Pif1	5.79285	5e-05
Gls2	5.79396	0.0279
Tpx2	5.7946	5e-05
Osbpl3	5.82249	5e-05
Alcam	5.82313	5e-05
Bub1	5.8247	5e-05
Ccr5	5.83767	5e-05
Chst2	5.85942	5e-05
Kdm4d	5.88813	0.0026
Kit	5.89831	5e-05
Cenpf	5.9068	5e-05
Nek2	5.91008	5e-05
Kif18b	5.91708	5e-05
Shcbp1	5.91782	5e-05
E2f7	5.92087	5e-05
BC030867	5.9373	5e-05
Pilrb1	5.94439	0.0001
Sema6d	5.95801	5e-05
Neil3	5.96244	5e-05
Gucy2e	5.98011	0.0026
Metrnl	5.99387	5e-05
Dio2	6.00306	0.0026
Specc1	6.00971	5e-05
Ube2c	6.01183	5e-05
4930431P03Rik	6.04451	5e-05
Depdc1a	6.06182	5e-05
Aurkb	6.06392	5e-05
Aldoc	6.0683	5e-05
Lancl3	6.06926	0.0026
Zbtb32	6.07345	5e-05
Fgl2	6.12473	5e-05
Gstt3	6.13776	5e-05
Hemgn	6.16674	0.0026
Cdk14	6.17227	0.0001
Ltbp3	6.18525	0.03845
Rab27b	6.20151	5e-05
Kif2c	6.27224	5e-05
Pkd2	6.27672	0.0026
Prelid2	6.31696	5e-05
Spag5	6.32329	5e-05
Cetn4	6.33556	0.0026
Pbk	6.40535	5e-05
Lrrc49	6.41208	0.0066
Galnt3	6.49419	5e-05
Il2ra	6.51291	5e-05
Fasl	6.53775	5e-05
Ska1	6.54568	5e-05
Grtp1	6.55307	0.0002
Slc16a3	6.56606	5e-05
Clip3	6.57422	0.0026
Emp1	6.57462	5e-05
Serpinb9b	6.60223	0.0026
Bcat1	6.63192	5e-05
Pcyt1b	6.64386	5e-05
Gm4841	6.67411	5e-05
Wdr54	6.67507	0.0026
Plscr1	6.7297	5e-05
Lgals3	6.75663	5e-05
Plxdc2	6.76622	5e-05
Bspry	6.7856	5e-05
Psrc1	6.78633	5e-05
Ebi3	6.79262	5e-05
Serpina3g	6.79741	5e-05
2010317E24Rik	6.81497	0.0026
Dapk2	6.87092	5e-05
Gzmc	6.89439	5e-05
Ryk	6.92285	5e-05
Fam84a	6.92517	0.0026
Tnip3	6.93572	0.0026
Klri2	6.976	5e-05
Ccr2	7.03734	5e-05
Zdhhc2	7.0657	5e-05
Rab39b	7.11429	0.0026
Lilrb4	7.12614	5e-05
Stc2	7.14239	5e-05
Gm4951	7.17549	5e-05
Bhlhe40	7.18658	5e-05
Itga7	7.24743	5e-05
Ctla4	7.31233	5e-05
Ak4	7.37253	5e-05
Mpp2	7.38315	0.0026
Serpina3f	7.47174	5e-05
Asns	7.52903	5e-05
Ptpn3	7.58463	5e-05
Gp49a	7.65399	5e-05
Dlg2	7.71578	0.0002
Plscr4	7.76661	0.0001
Lag3	7.7892	5e-05
Gzmb	7.84235	5e-05
Fam64a	7.88317	0.0001
Stk32c	7.89451	0.0012
4930583H14Rik	7.90708	5e-05
Vegfa	7.99902	5e-05
Mcf2l	8.00404	0.0027
Ttc39c	8.07328	5e-05
Thbs1	8.08847	0.0026
Lif	8.13239	5e-05
D630039A03Rik	8.19726	5e-05
Serpine2	8.22001	5e-05
Cables1	8.4614	5e-05
Cd80	8.46284	0.0026
AA467197	8.59058	5e-05
Spp1	8.82404	0.0001
Cdkn1a	8.84312	0.0009
Mt1	9.19484	0.0026
Nrn1	9.30587	5e-05
Upp1	10.0728	0.0082

## Sheet: 1vs2
	2-fold change cut-off		Total genes: 618
CuffDiff Analysis: Group 1 vs Group 2
Gene	log2(fold_change)	p_value
Gja5	-9.26107	0.00265
Il10	-9.16252	0.00265
Igj	-8.84206	5e-05
4932425I24Rik	-7.7057	0.00265
Wnt10b	-6.82627	5e-05
Zcchc14	-6.1678	0.00265
Gzmf	-6.05962	5e-05
Dsc2	-5.99644	5e-05
Ifitm1	-5.96621	5e-05
Adrb1	-5.92208	0.00265
Fgd2	-5.80647	5e-05
Mycn	-5.75689	5e-05
Tead1	-5.7367	5e-05
Fads3	-5.61819	5e-05
Esm1	-5.51374	5e-05
Nlrp6	-5.50678	5e-05
Pkib	-5.42859	5e-05
Angptl2	-5.40417	0.02415
Endou	-5.3993	5e-05
Gzma	-5.33131	5e-05
Gpx8	-5.2053	5e-05
Klhl30	-5.07235	5e-05
Irx2	-4.89771	0.03875
Man1c1	-4.83719	0.00265
Unc5b	-4.80592	5e-05
Nav1	-4.74246	5e-05
Sult2b1	-4.70954	5e-05
Rpph1	-4.6821	5e-05
Rps6ka6	-4.64099	0.00265
B4galnt2	-4.53878	5e-05
Tnfrsf8	-4.5335	5e-05
Gldc	-4.52651	5e-05
Rapgef3	-4.52521	5e-05
Cd36	-4.52503	5e-05
Dgkh	-4.5122	5e-05
Rbpms2	-4.48658	5e-05
Tspan9	-4.48512	5e-05
Adcy5	-4.46752	5e-05
P2ry13	-4.43019	5e-05
C630043F03Rik	-4.38545	0.00265
Il1rl1	-4.36389	5e-05
Mcpt8	-4.33317	5e-05
Foxp3	-4.28593	5e-05
Fam129b	-4.20826	5e-05
1810006J02Rik	-4.19853	5e-05
Psg17	-4.13047	5e-05
Gm13546	-4.10941	5e-05
Sdc1	-4.04249	5e-05
S100a5	-3.99735	0.0028
Ermn	-3.91444	0.0028
Steap3	-3.91398	5e-05
Mical2	-3.84125	5e-05
Gzmg	-3.83671	0.0001
Gpr15	-3.83065	5e-05
Csn2	-3.81231	5e-05
Gm12253	-3.81004	5e-05
9430020K01Rik	-3.79782	5e-05
Lat2	-3.76761	5e-05
1810011H11Rik	-3.72127	5e-05
Matn2	-3.71802	5e-05
Vill	-3.71659	0.0001
Fkbp11	-3.70998	5e-05
Gzme	-3.70313	5e-05
Tle1	-3.7009	5e-05
Alpk2	-3.6936	5e-05
Ifitm3	-3.65557	5e-05
Cd244	-3.65102	5e-05
Hnf1b	-3.62435	5e-05
Bahcc1	-3.58257	5e-05
Myo16	-3.57255	5e-05
Plcd1	-3.55693	5e-05
Gzmd	-3.53711	5e-05
5830473C10Rik	-3.50667	5e-05
Ccno	-3.49361	0.00035
Bfsp2	-3.4898	0.0236
Gm5111	-3.48725	5e-05
Nhsl2	-3.486	5e-05
Rpp25	-3.47061	0.00035
5730420D15Rik	-3.44884	0.0173
Clnk	-3.41649	5e-05
Piwil4	-3.40351	5e-05
Cbfa2t3	-3.3736	5e-05
Gucy2e	-3.35203	5e-05
Itsn1	-3.34497	5e-05
Sh3tc1	-3.33941	5e-05
Ggt1	-3.31614	5e-05
Nap1l3	-3.30726	5e-05
Hmx2	-3.29696	0.0066
Csgalnact1	-3.2678	5e-05
Gpr141	-3.24067	5e-05
Lmna	-3.23199	5e-05
a	-3.2198	5e-05
Klrg1	-3.20035	0.0004
Agpat9	-3.19134	5e-05
Cryba4	-3.19057	0.00395
Xylt1	-3.17527	5e-05
Pla1a	-3.1724	5e-05
Maf	-3.16372	5e-05
B230120H23Rik	-3.15919	5e-05
Prg2	-3.14178	0.00525
Tmem37	-3.14018	5e-05
Epas1	-3.1268	5e-05
Lims2	-3.11521	0.0002
Rgs8	-3.1036	5e-05
Abcb9	-3.0694	5e-05
Pparg	-3.01499	5e-05
C1qtnf6	-3.01317	5e-05
Adamts14	-3.01273	5e-05
5830418P13Rik	-3.01005	0.0003
Tgfb3	-2.98734	5e-05
Pde4a	-2.98526	5e-05
Egr1	-2.98424	5e-05
Ccl5	-2.98395	5e-05
Hgfac	-2.97988	0.00015
Havcr2	-2.97873	5e-05
Glp1r	-2.96553	0.00015
Tmem40	-2.96284	5e-05
Oit3	-2.96196	5e-05
S100a4	-2.94139	5e-05
Prdm1	-2.93303	5e-05
Pdcd1	-2.90605	5e-05
Nfe2	-2.89662	5e-05
Csf1	-2.89398	5e-05
Gzmk	-2.88911	5e-05
Gzmc	-2.87514	5e-05
Slc16a10	-2.85846	5e-05
Procr	-2.84844	5e-05
Hist1h2bj	-2.84039	5e-05
Klra5	-2.8377	5e-05
Itgae	-2.83308	5e-05
Ltb4r1	-2.83243	5e-05
Pik3r6	-2.82841	5e-05
B4galnt4	-2.82297	5e-05
Serpinb1a	-2.81719	5e-05
Prf1	-2.81708	5e-05
Pygm	-2.7763	5e-05
Adam3	-2.75728	0.00025
9030619P08Rik	-2.7514	5e-05
Dusp4	-2.74139	5e-05
Sema7a	-2.73386	5e-05
Tanc2	-2.72768	5e-05
Pls1	-2.71301	5e-05
Atp6v0a1	-2.70896	5e-05
Klrb1c	-2.7087	5e-05
Ifng	-2.70432	5e-05
Fam20a	-2.70186	5e-05
Sh2d1b1	-2.69797	5e-05
2900026A02Rik	-2.6873	5e-05
Siglec5	-2.68538	5e-05
2210408F21Rik	-2.67417	5e-05
Gcnt1	-2.65689	5e-05
Hist1h2bm	-2.65672	0.0027
Amotl1	-2.65219	5e-05
Dmwd	-2.63383	5e-05
S100a6	-2.61038	5e-05
Xcr1	-2.59166	5e-05
Fcrl6	-2.58479	5e-05
Hist1h4m	-2.58279	0.0019
Cmklr1	-2.57239	5e-05
Rai14	-2.54473	5e-05
AI661453	-2.53645	5e-05
Slc30a2	-2.53537	5e-05
Hist1h3h	-2.53002	0.0031
Hist1h2ak	-2.51244	0.00345
Lrrc25	-2.51166	5e-05
Nrtn	-2.49616	0.00155
Tbc1d2	-2.48941	5e-05
Cass4	-2.48754	5e-05
Tom1l1	-2.47296	5e-05
Lrp11	-2.47045	5e-05
Myadm	-2.46927	5e-05
Pcx	-2.46861	5e-05
Reep6	-2.46319	5e-05
Ccl4	-2.41936	5e-05
Prss34	-2.41858	5e-05
Rap1gap2	-2.41181	5e-05
Emid1	-2.38966	5e-05
Ogdhl	-2.38169	5e-05
Bambi	-2.37841	5e-05
Rapsn	-2.374	5e-05
Chit1	-2.37368	0.0049
Hrc	-2.3728	5e-05
Fads2	-2.3707	5e-05
Prkcc	-2.36604	5e-05
Klra3	-2.33909	5e-05
Kcnab3	-2.33601	5e-05
B230118H07Rik	-2.33424	5e-05
Alox8	-2.33406	5e-05
Etv4	-2.32689	5e-05
Enah	-2.32159	5e-05
Ptpn5	-2.32038	5e-05
Extl1	-2.31621	5e-05
Dmrt2	-2.29975	5e-05
Sh2d5	-2.29386	5e-05
1700026L06Rik	-2.27607	5e-05
Rpl39l	-2.26678	0.0005
Npnt	-2.26623	5e-05
Cd163l1	-2.26484	5e-05
2013-09-05	-2.25085	0.00015
Srl	-2.24649	5e-05
Fcer1g	-2.24423	5e-05
Bex6	-2.23488	0.0065
Speer1-ps1	-2.23399	5e-05
5033406O09Rik	-2.22901	0.00175
Scd1	-2.2278	5e-05
Gpr56	-2.2236	5e-05
Lzts2	-2.20247	5e-05
Kif19a	-2.20169	5e-05
Rassf6	-2.19314	5e-05
Tas1r1	-2.18986	5e-05
Hist1h1a	-2.18422	0.00765
Itga1	-2.17703	5e-05
Rtn2	-2.17179	5e-05
1700020L24Rik	-2.16304	5e-05
Fut7	-2.15875	5e-05
Hist1h2ag	-2.15852	5e-05
Cited4	-2.14664	0.00885
Tubb6	-2.13903	5e-05
Rcn3	-2.13828	5e-05
Serf1	-2.13656	5e-05
Gcat	-2.13087	5e-05
Edaradd	-2.12723	5e-05
Anxa1	-2.12423	5e-05
Ccl1	-2.12418	0.0326
Gstm5	-2.12213	5e-05
Ccbl2	-2.11887	5e-05
Hist1h3f	-2.10397	0.0031
Cdkn2b	-2.09748	5e-05
Dusp5	-2.09627	5e-05
Egfl7	-2.08255	5e-05
Hist1h1b	-2.07816	0.00315
Bsn	-2.07786	5e-05
Tmem163	-2.07338	5e-05
Hist1h4j	-2.07005	0.00555
Gpr55	-2.06879	5e-05
Camkk1	-2.0663	5e-05
Gipc3	-2.05462	5e-05
Zfp608	-2.05396	5e-05
Frmd4b	-2.05239	5e-05
Hist1h2ai	-2.05007	0.00355
Tdrkh	-2.046	5e-05
Nkain1	-2.04306	5e-05
Epdr1	-2.03557	5e-05
Pwwp2b	-2.0323	5e-05
Ctnnal1	-2.01802	5e-05
Zfp385a	-2.00875	5e-05
Dab2ip	-2.00548	5e-05
Exoc3l	-2.00278	5e-05
Slfn1	2.00282	5e-05
Brdt	2.00335	5e-05
Slc4a7	2.00435	5e-05
Olfr56	2.00537	5e-05
Ctxn1	2.00945	5e-05
Lilrb4	2.01086	5e-05
Sec31b	2.01553	5e-05
Lynx1	2.01597	5e-05
Gbp5	2.0173	5e-05
Trim2	2.02269	5e-05
Serpinc1	2.02822	0.0011
Zeb2	2.03651	5e-05
Cd200r4	2.03708	5e-05
Ms4a4d	2.03851	5e-05
Atcay	2.03937	5e-05
Gm10863	2.04032	0.0142
Slc15a1	2.04055	5e-05
Capn11	2.04564	5e-05
Ret	2.04833	5e-05
Gm10406	2.04843	5e-05
Spnb3	2.05317	5e-05
Lrrn4	2.06899	5e-05
Cxx1c	2.07657	5e-05
Gpr179	2.08054	5e-05
Tspan3	2.0851	5e-05
Gm4858	2.08735	5e-05
C030039L03Rik	2.08834	5e-05
Lpp	2.09852	5e-05
Abcg2	2.09934	5e-05
5430402O13Rik	2.10531	0.00835
Gbe1	2.10629	5e-05
Ctse	2.10717	5e-05
Smpdl3a	2.10867	5e-05
Armcx2	2.11741	5e-05
Pgap1	2.11771	5e-05
Art4	2.12253	5e-05
Sepp1	2.1231	5e-05
Gm2011	2.12616	0.0212
Usp35	2.13069	5e-05
A430035B10Rik	2.13149	5e-05
4833422C13Rik	2.13213	5e-05
Il15	2.13425	0.0118
Wbscr27	2.13691	5e-05
Siah3	2.13879	0.0303
Gab2	2.14035	5e-05
Pak1	2.14202	5e-05
Hk3	2.1438	5e-05
Gm3002	2.14489	5e-05
Aif1	2.1524	0.009
Nrn1l	2.156	0.03295
Cd40lg	2.15611	5e-05
Lysmd2	2.1565	5e-05
Nmnat2	2.15841	5e-05
Clec4d	2.15854	0.0008
Fam3b	2.16079	0.0092
Kcnmb4	2.16332	5e-05
1500017E21Rik	2.16899	5e-05
Sh2b3	2.17259	5e-05
Gm17745	2.17911	5e-05
Ctsf	2.1841	5e-05
Clec2g	2.18439	5e-05
4933440M02Rik	2.19204	0.0023
Ankrd35	2.19851	5e-05
Selenbp1	2.20314	5e-05
4930506M07Rik	2.20321	5e-05
Zfp238	2.20524	5e-05
Tpd52	2.20901	5e-05
Plxdc2	2.2177	5e-05
Maged2	2.22064	5e-05
Clec2i	2.23299	5e-05
Ccdc141	2.23633	5e-05
Ly86	2.23889	0.02805
Ncald	2.24115	5e-05
C1qtnf4	2.24358	0.00555
B3galt5	2.24641	5e-05
Pcdhgc5	2.24677	5e-05
Gab3	2.24905	5e-05
Lama5	2.25719	5e-05
Gpr162	2.25764	5e-05
Tktl1	2.25928	5e-05
Plxnb2	2.26403	5e-05
Fndc3b	2.26496	5e-05
Serp2	2.26768	5e-05
Inadl	2.27116	5e-05
Rnf152	2.27131	5e-05
Slc14a1	2.2825	5e-05
Dlg2	2.28485	5e-05
Rgs11	2.28796	5e-05
Cd70	2.29525	0.00045
Gatsl3	2.29695	5e-05
Arntl	2.29812	5e-05
Il1rl2	2.30418	5e-05
Prph	2.31466	5e-05
As3mt	2.31488	5e-05
Smad3	2.31905	5e-05
Fam26f	2.32395	5e-05
Lypd6b	2.32976	5e-05
Phlpp1	2.33547	5e-05
Tlr1	2.3357	5e-05
Ehd3	2.3428	5e-05
Rxra	2.36041	5e-05
3110007F17Rik	2.36248	0.022
Bank1	2.36824	5e-05
Gm14446	2.37634	5e-05
2610035D17Rik	2.38107	5e-05
Card9	2.39041	0.00455
Gbp10	2.39513	5e-05
Stc2	2.39995	5e-05
Atp8a2	2.40051	5e-05
Satb1	2.40439	5e-05
Aig1	2.40902	5e-05
Fsd1l	2.40904	5e-05
A930038C07Rik	2.41085	5e-05
Glrp1	2.41414	5e-05
Spock2	2.43166	5e-05
Fam114a1	2.4328	5e-05
Rab6b	2.4438	5e-05
AF529169	2.46633	5e-05
Cfb	2.47116	5e-05
Slc6a9	2.47489	5e-05
Sh3bp5	2.47665	5e-05
Syt11	2.48253	5e-05
Als2cl	2.48523	5e-05
Fam49a	2.49969	5e-05
E030011O05Rik	2.50297	0.01525
Plaur	2.50703	0.0158
Reep1	2.51018	5e-05
Cyp4v3	2.51257	5e-05
Klrb1f	2.51639	5e-05
Gata1	2.51707	5e-05
E130102H24Rik	2.52367	5e-05
Hectd2	2.52452	5e-05
Tarm1	2.5453	0.016
AB124611	2.54574	5e-05
Cxcl10	2.55177	5e-05
Sfmbt2	2.55776	5e-05
Zfp710	2.56328	5e-05
Bach2	2.56952	5e-05
Upp1	2.58289	5e-05
Tgtp1	2.59258	5e-05
Vangl1	2.59308	5e-05
Tnfsf14	2.60784	5e-05
Dpp4	2.60828	5e-05
Smo	2.61004	5e-05
Tjp1	2.61743	5e-05
Mansc1	2.61902	5e-05
Armcx1	2.63277	5e-05
Serpina3h	2.63905	0.0006
Dync2li1	2.64499	0.0006
Nipa1	2.6541	5e-05
2010005H15Rik	2.659	0.00975
Pde8a	2.66625	5e-05
Rgs9	2.6714	5e-05
Pcdhgc4	2.67325	5e-05
Mmp11	2.67364	0.00015
Tmem231	2.68266	5e-05
Ddx60	2.68366	5e-05
Ica1	2.68436	5e-05
Vav2	2.6873	5e-05
Mcam	2.68865	5e-05
Asap1	2.68965	5e-05
Dnm1	2.6968	5e-05
H1fx	2.70202	5e-05
Nupr1	2.70304	5e-05
6330403K07Rik	2.70788	5e-05
Atp1b1	2.71022	0.00045
Xcl1	2.71288	5e-05
Mylip	2.72023	5e-05
Vmn2r96	2.73034	0.00255
Enpp2	2.73812	5e-05
Ryr3	2.74599	5e-05
Tm4sf5	2.74982	0.0019
Rere	2.75387	5e-05
Fam46c	2.7647	5e-05
Cnn3	2.76835	0.0001
Gpm6b	2.7737	5e-05
4930599N23Rik	2.78024	0.0402
Klf3	2.78847	5e-05
Ntrk3	2.78905	5e-05
Serpinb9b	2.79105	5e-05
Ceacam15	2.79978	5e-05
Acvr2a	2.81237	5e-05
Sbsn	2.81315	5e-05
Tet1	2.81474	5e-05
Smtnl2	2.81531	5e-05
2510009E07Rik	2.81704	5e-05
Zbtb46	2.82451	0.00295
Gm8369	2.83377	5e-05
Plekha1	2.84589	5e-05
Hdac11	2.84595	5e-05
Cyth3	2.85885	5e-05
Sectm1a	2.87873	0.00155
Tbc1d4	2.89397	5e-05
Esr1	2.90657	5e-05
Mcoln3	2.90712	5e-05
Rnf122	2.92705	5e-05
P2rx4	2.92716	5e-05
Mcf2l	2.94304	5e-05
Tlr4	2.95362	5e-05
BC051537	2.9643	0.00145
Mtap7	2.97695	5e-05
C530028O21Rik	2.98201	5e-05
Rab39b	2.98645	5e-05
Btbd11	2.98719	5e-05
Hmgn3	2.99139	5e-05
Ggt7	2.99437	5e-05
Rora	2.99987	5e-05
Papss2	3.00278	0.0001
Plk2	3.00349	5e-05
Fggy	3.01445	5e-05
Cysltr2	3.04885	5e-05
Zfp516	3.07211	5e-05
Cntln	3.10845	5e-05
Mapk11	3.12027	5e-05
Otud1	3.12498	5e-05
Dio2	3.13814	5e-05
Ms4a6d	3.16894	5e-05
Gm12185	3.18532	5e-05
Crtam	3.19263	5e-05
Aff3	3.20116	5e-05
Cth	3.2059	5e-05
Rasgef1a	3.20753	5e-05
Abcg3	3.22093	5e-05
Grin1	3.2278	5e-05
Tsc22d1	3.2339	5e-05
Mnda	3.24074	0.0009
Mid2	3.26724	5e-05
Slc12a8	3.27012	5e-05
Ddx43	3.27228	5e-05
Sell	3.28798	5e-05
Slc22a17	3.28908	5e-05
Rapgef4	3.29397	5e-05
Bmp7	3.3354	0.00665
Serpina3g	3.33758	5e-05
Igsf3	3.33849	5e-05
Prkcdbp	3.37153	0.00335
4930583H14Rik	3.39346	5e-05
Gm9199	3.40122	5e-05
Gbp2	3.40371	5e-05
Vwa5a	3.41315	5e-05
Vegfa	3.41928	5e-05
Art2b	3.4654	5e-05
Cxcr5	3.46821	0.0056
Ypel4	3.50575	0.00255
Bend5	3.56199	5e-05
Zfp467	3.56262	5e-05
1700042O10Rik	3.58386	0.0028
Klf4	3.59452	5e-05
Slc4a10	3.61121	5e-05
Thsd7b	3.61188	5e-05
Fsd2	3.61547	5e-05
Gm11992	3.63031	5e-05
C1qb	3.6322	0.0001
Chst2	3.64084	5e-05
Tox	3.66746	5e-05
Eng	3.668	5e-05
Dtx4	3.67489	5e-05
Zfp395	3.70824	5e-05
Arrb1	3.71081	5e-05
Kit	3.73933	5e-05
Nebl	3.76645	5e-05
Gm14085	3.768	5e-05
Cuedc1	3.77629	5e-05
Slamf6	3.78438	5e-05
Emr1	3.80252	0.00405
Whrn	3.80344	5e-05
Ifi44	3.82568	5e-05
Cecr6	3.85068	5e-05
Syde1	3.8514	0.0032
Chi3l3	3.86035	0.00195
Mapk8ip1	3.86595	0.00035
Itga4	3.88854	5e-05
Uchl1	3.88964	5e-05
Sorcs1	3.90967	5e-05
Dixdc1	3.95012	5e-05
Dscam	4.01079	5e-05
Cldn10	4.02207	0.00015
H2-Eb1	4.02993	0.0024
Tmie	4.03771	0.00265
Scrt1	4.04515	5e-05
H2-Aa	4.04961	0.0019
Spo11	4.08832	5e-05
Irg1	4.08973	0.0019
Tnfsf4	4.09652	5e-05
Akr1b8	4.1423	0.0026
Capn3	4.14769	5e-05
Fas	4.16999	5e-05
AI836003	4.1829	5e-05
Klhl3	4.19694	0.0023
Samd3	4.19858	5e-05
Ifngr2	4.22799	5e-05
P4ha2	4.23879	5e-05
Parvb	4.26198	5e-05
F830016B08Rik	4.28223	5e-05
Enpp5	4.29086	5e-05
Csf2	4.30066	5e-05
Slc7a3	4.30435	5e-05
Kif5c	4.3202	5e-05
Bace2	4.3297	5e-05
Pou6f1	4.34161	5e-05
Kcna4	4.35639	5e-05
Akap2	4.37715	5e-05
Tnfsf8	4.40246	5e-05
Ift81	4.4038	0.0018
H2-Ab1	4.45934	5e-05
Cd74	4.48438	5e-05
Ccr7	4.49345	5e-05
Trpa1	4.49455	0.0001
Nid1	4.50046	5e-05
Dyrk4	4.53321	0.002
Fam124b	4.54186	0.0001
Lrig1	4.54777	5e-05
Lrrk2	4.58253	5e-05
Olfr920	4.58658	0.0026
Qpct	4.60459	5e-05
Ugt1a7c	4.62566	5e-05
Tmod2	4.66225	5e-05
Espn	4.66741	5e-05
Ddc	4.69828	5e-05
Gucy1b3	4.72007	0.00085
Cybb	4.74709	0.0001
Pla2g7	4.76617	0.00045
Ms4a4c	4.77142	5e-05
Clip3	4.77331	5e-05
Mtap2	4.78812	5e-05
Gbp11	4.79114	5e-05
Sdc4	4.95578	5e-05
C1qc	4.95781	0.0026
Synpo	4.96529	5e-05
Cd83	4.99959	0.0026
Cd300lf	5.02577	0.02595
Gpr133	5.02669	0.0026
Tlr12	5.13661	5e-05
Osr2	5.21666	0.0026
Arrdc4	5.2384	0.0002
Thbs1	5.28853	5e-05
Serpina3f	5.31747	5e-05
St6galnac3	5.43455	0.0026
Mapk12	5.43559	0.0018
Iigp1	5.44237	5e-05
Pou2af1	5.45802	0.0019
Mpeg1	5.45832	5e-05
Nsg2	5.45986	5e-05
Gm4841	5.46485	5e-05
Tnfaip2	5.52278	0.0026
Tuba8	5.54119	0.0001
Slc2a6	5.57515	5e-05
App	5.61716	5e-05
Lyz2	5.63996	5e-05
C3	5.73182	5e-05
Penk	5.77615	5e-05
St8sia1	5.80568	5e-05
Col6a2	5.92201	0.0026
Igf1r	6.11099	5e-05
Gucy1a3	6.22667	5e-05
Nrn1	6.2559	5e-05
Itga7	6.25733	5e-05
Twist1	6.32152	0.0026
Npas2	6.53479	0.0018
Grtp1	6.67845	5e-05
Trerf1	6.71363	5e-05
Tcf7	6.78028	5e-05
Gm4951	6.82932	5e-05
Lif	7.05954	5e-05
Oaf	7.22546	0.0026
Lad1	7.31422	0.0026
P2rx7	7.38349	0.0002
Slc6a19	7.3951	0.0028
Dapl1	7.61822	0.0026
Tgm2	7.8548	5e-05

## Sheet: 1vs3
	2-fold change cut-off		Total genes: 636
CuffDiff Analysis: Group 1 vs Group 3
Gene	log2(fold_change)	p_value
Gja5	-10.2993	0.0272
Igj	-8.61489	5e-05
Ifitm1	-7.0917	5e-05
Tead1	-6.58002	0.0007
Gzma	-6.54392	5e-05
Mcpt8	-6.48457	0.0396
Gzmf	-6.47834	5e-05
Dsc2	-6.45204	0.00265
Foxp3	-6.387	0.00155
Esm1	-6.35103	5e-05
Fgd2	-6.2339	5e-05
Wnt10b	-6.09553	5e-05
Mycn	-6.05749	5e-05
Adrb1	-5.95257	0.0322
Endou	-5.9141	5e-05
Rpph1	-5.90101	5e-05
Gpr15	-5.87958	5e-05
Gpx8	-5.7616	0.00265
Nav1	-5.53917	5e-05
Csgalnact1	-5.49517	5e-05
Nlrp6	-5.46913	5e-05
Fads3	-5.39398	5e-05
Psg17	-5.38515	5e-05
Ermn	-5.36119	0.0327
Irx2	-5.34877	0.0327
1810011H11Rik	-5.27523	5e-05
Cd36	-5.24575	5e-05
P2ry13	-5.16441	5e-05
Gzme	-5.0883	5e-05
S100a5	-5.03847	0.02745
Msrb3	-4.97139	0.00015
Gm5111	-4.88252	0.00265
1810006J02Rik	-4.81105	5e-05
Klhl30	-4.74019	5e-05
Sh3tc1	-4.729	0.00265
Ddn	-4.71857	5e-05
Tnfrsf8	-4.68011	5e-05
Rapgef3	-4.67742	5e-05
Rps6ka6	-4.67394	0.00265
B4galnt2	-4.63697	5e-05
Sult2b1	-4.63002	5e-05
Il1rl1	-4.62626	5e-05
Clnk	-4.59594	5e-05
Gstm5	-4.58692	0.0006
Unc5b	-4.57833	5e-05
Gldc	-4.56696	5e-05
Zcchc14	-4.55314	5e-05
Gzmd	-4.53886	5e-05
9430020K01Rik	-4.45779	5e-05
a	-4.45163	0.00265
Matn2	-4.39328	0.00265
Tspan9	-4.38697	5e-05
Myo16	-4.32636	5e-05
Mical2	-4.28992	5e-05
Dgkh	-4.2674	5e-05
Cd244	-4.2271	5e-05
Fam129b	-4.17284	5e-05
Bahcc1	-4.16895	5e-05
Tle1	-4.14681	5e-05
B4galnt4	-4.13771	5e-05
Lat2	-4.12275	5e-05
Clec2l	-4.08413	0.0327
Hnf1b	-4.08149	0.00265
Sdc1	-4.03727	5e-05
Klra5	-4.00923	5e-05
Gm12253	-3.99994	5e-05
Angptl2	-3.98131	0.00035
Ifitm3	-3.97834	5e-05
Man1c1	-3.96617	5e-05
Dmrt2	-3.88016	0.00015
Agpat9	-3.87994	5e-05
Steap3	-3.87204	5e-05
Itsn1	-3.8531	5e-05
Cmklr1	-3.83161	0.00275
O3far1	-3.80238	0.00305
Gm156	-3.79758	5e-05
Gzmc	-3.7325	5e-05
Adam3	-3.68916	0.00345
Plcd1	-3.66926	5e-05
Pparg	-3.63294	5e-05
Gm13546	-3.61747	5e-05
Tgfb3	-3.61128	5e-05
Cass4	-3.60055	5e-05
Oit3	-3.55123	5e-05
Csn2	-3.54698	5e-05
Gpr141	-3.54072	5e-05
Ifitm5	-3.47638	0.02815
Alpk2	-3.45843	5e-05
S100a4	-3.43625	5e-05
Tmem40	-3.43354	5e-05
Serpinb1a	-3.42634	5e-05
Rpp25	-3.38006	0.0004
Itga1	-3.36418	5e-05
Enah	-3.34352	5e-05
Myadm	-3.32002	5e-05
Havcr2	-3.30316	5e-05
Cd163l1	-3.30071	5e-05
Nhsl2	-3.28631	5e-05
Gpr56	-3.2804	5e-05
Pdcd1	-3.2411	5e-05
Fkbp11	-3.22603	5e-05
Hist1h3h	-3.21628	0.0057
Xcr1	-3.20074	5e-05
Prdm1	-3.16381	5e-05
AI661453	-3.15792	5e-05
Csf1	-3.15335	5e-05
Vrtn	-3.15226	0.0001
Prkcc	-3.14415	0.0001
Epas1	-3.13744	5e-05
Nap1l3	-3.1259	5e-05
Gcnt1	-3.12476	5e-05
Rassf6	-3.11639	0.00015
Rgs8	-3.108	5e-05
Ccl5	-3.09097	5e-05
Adcy5	-3.08919	5e-05
Rai14	-3.08386	5e-05
Ggt1	-3.06597	5e-05
Lmna	-3.05195	5e-05
Fam20a	-3.03364	5e-05
Pvrl2	-3.00497	5e-05
Glp1r	-3.00475	0.00015
Adora3	-2.99412	5e-05
Vill	-2.979	5e-05
1700026L06Rik	-2.97739	0.0009
Sh2d1b1	-2.95995	5e-05
C1qtnf6	-2.91864	5e-05
Gzmk	-2.90356	5e-05
Fcer1g	-2.90149	5e-05
Atp6v0a1	-2.88613	5e-05
Pde4a	-2.87756	5e-05
Maf	-2.87308	5e-05
Pla1a	-2.86548	5e-05
Ltb4r1	-2.83544	5e-05
Itgae	-2.83209	5e-05
Gm6460	-2.8236	0.0002
Cryba4	-2.8164	0.03455
Cdh1	-2.81522	5e-05
Cdkn2b	-2.80946	5e-05
Pik3r6	-2.80774	5e-05
Klra3	-2.79254	0.0006
Ifng	-2.78377	5e-05
5830418P13Rik	-2.78096	0.0005
4933402N22Rik	-2.76529	0.00975
Pwwp2b	-2.76527	5e-05
Adamts14	-2.75589	5e-05
Extl1	-2.73727	5e-05
Prf1	-2.73702	5e-05
Bex6	-2.73453	0.01345
Bfsp2	-2.72627	0.00775
Emid1	-2.715	5e-05
Nfe2	-2.71203	5e-05
Hist1h2ak	-2.70669	0.00995
Hmx2	-2.68019	0.00195
2900026A02Rik	-2.66624	5e-05
Ogdhl	-2.65635	5e-05
Hrc	-2.6541	5e-05
Cited4	-2.64181	0.01475
Ahrr	-2.64093	5e-05
9030619P08Rik	-2.64059	5e-05
Piwil4	-2.63374	5e-05
Tbc1d2	-2.62742	5e-05
B230120H23Rik	-2.61705	5e-05
Egr1	-2.6067	5e-05
2210408F21Rik	-2.60463	5e-05
Abcb9	-2.59489	5e-05
Ppp2r2c	-2.59296	5e-05
Gipc3	-2.5804	5e-05
Kcnab3	-2.57907	5e-05
Gucy2e	-2.57715	5e-05
Klrb1c	-2.56809	5e-05
Amotl1	-2.56676	5e-05
Tgm1	-2.55589	5e-05
Mrgpre	-2.54084	5e-05
Ifitm2	-2.53516	5e-05
Tmem37	-2.53297	5e-05
S100a6	-2.52827	5e-05
Pcx	-2.51895	5e-05
Cbfa2t3	-2.50857	5e-05
Siglec5	-2.50092	5e-05
Clec12a	-2.49953	5e-05
Pls1	-2.49537	5e-05
Bambi	-2.49456	5e-05
Trp53inp2	-2.48621	5e-05
Camkk1	-2.4794	5e-05
Ccl4	-2.473	5e-05
Tom1l1	-2.46031	5e-05
Frmd4b	-2.45641	5e-05
Npnt	-2.445	5e-05
Pygm	-2.44171	5e-05
Speer1-ps1	-2.43953	5e-05
Tanc2	-2.42541	5e-05
Sh2d5	-2.37348	5e-05
Dusp4	-2.37287	5e-05
5033406O09Rik	-2.37061	0.00145
Prr5	-2.35696	5e-05
Sema7a	-2.35319	5e-05
Epdr1	-2.33706	5e-05
Rmrp	-2.33613	0.00325
Lzts2	-2.32867	5e-05
Slc9a3r2	-2.32518	5e-05
Xylt1	-2.31935	5e-05
Anxa1	-2.30971	5e-05
Arap3	-2.30868	5e-05
1700020L24Rik	-2.30782	5e-05
Gpr55	-2.26637	5e-05
Lrp11	-2.26626	5e-05
Gpr97	-2.26112	5e-05
Dab2ip	-2.24814	5e-05
Plau	-2.24603	5e-05
Dusp5	-2.24163	5e-05
Card10	-2.24154	5e-05
Tas1r1	-2.23011	5e-05
Ttyh2	-2.22423	0.00015
Rapsn	-2.22333	5e-05
Hist1h3e	-2.21699	0.0064
Ly6g5b	-2.21491	5e-05
Slc16a10	-2.20549	5e-05
Hist1h4m	-2.20327	0.02285
Cask	-2.20312	5e-05
Socs2	-2.20078	5e-05
Bsn	-2.19289	5e-05
Tmem163	-2.19048	5e-05
Chit1	-2.15151	0.0064
Erg	-2.149	5e-05
Slc30a2	-2.14654	5e-05
Vash1	-2.14485	5e-05
Swap70	-2.14446	5e-05
Entpd1	-2.14179	5e-05
Tdrkh	-2.14123	5e-05
Hgfac	-2.13545	5e-05
Lrrc25	-2.13431	5e-05
Ptpn5	-2.13242	5e-05
Aoah	-2.12567	5e-05
Exoc3l	-2.12251	5e-05
Etv5	-2.1187	5e-05
Dbn1	-2.11742	0.0002
Hist1h2bm	-2.11692	0.0021
Obsl1	-2.11689	5e-05
Srl	-2.1132	5e-05
Etv4	-2.10772	5e-05
Hist1h2ai	-2.09353	0.0027
Gcat	-2.08676	5e-05
Evpl	-2.07692	5e-05
St3gal5	-2.07559	5e-05
Edaradd	-2.07381	5e-05
Gm8773	-2.0483	5e-05
Faim3	-2.04796	5e-05
Tubb6	-2.04465	5e-05
Kif19a	-2.04252	5e-05
Ccbl2	-2.0392	5e-05
Procr	-2.03839	5e-05
Zfyve28	-2.03227	5e-05
Rtn2	-2.03192	0.00065
Tspan2	-2.03155	5e-05
Ctnnd2	-2.03153	5e-05
Tsga10	-2.02204	5e-05
Hist1h1b	-2.01566	0.0026
Lgmn	-2.00429	5e-05
Dmwd	-2.00194	5e-05
Kndc1	2.0041	5e-05
Gm2011	2.00622	0.0222
Gab2	2.00625	5e-05
Phlpp1	2.01862	5e-05
1110046J04Rik	2.02572	5e-05
Zfp238	2.03153	5e-05
Gbp5	2.03361	5e-05
Arhgef9	2.03424	5e-05
Mboat2	2.03672	5e-05
Ldhb	2.03709	5e-05
Scml4	2.04232	5e-05
Ephx1	2.04538	5e-05
As3mt	2.04713	5e-05
Atcay	2.04789	5e-05
Dlg2	2.04846	5e-05
Reep1	2.05093	5e-05
Gab3	2.05563	5e-05
Trim2	2.05951	5e-05
Dlg4	2.06407	5e-05
H2-Q10	2.07172	5e-05
Serinc5	2.07283	5e-05
Id3	2.07361	5e-05
Ctxn1	2.07878	5e-05
Zhx2	2.07918	5e-05
Tpd52	2.08521	5e-05
Atp1b2	2.09309	5e-05
Abcg2	2.09401	5e-05
B3galt5	2.09461	5e-05
E130102H24Rik	2.09669	5e-05
Fam132a	2.09941	5e-05
1500017E21Rik	2.10237	5e-05
Gbe1	2.10276	5e-05
Dbp	2.10287	5e-05
Gm10863	2.11026	0.01395
Aif1	2.11309	0.0104
Smarcd3	2.11443	5e-05
Il1rl2	2.12438	5e-05
Kcnmb4	2.12465	5e-05
Zbtb20	2.13003	5e-05
Sepp1	2.13216	5e-05
Ncoa7	2.13235	5e-05
Cxx1c	2.13239	5e-05
Lysmd2	2.1339	5e-05
Ctse	2.13859	5e-05
Usp35	2.1401	5e-05
Armcx1	2.1465	0.0001
Art4	2.1586	5e-05
3110007F17Rik	2.16076	0.03285
Gbp10	2.16224	5e-05
Lama5	2.16666	5e-05
Nfkbia	2.16932	5e-05
Nod2	2.1697	5e-05
Dnajc27	2.16999	5e-05
Stc2	2.1726	5e-05
Zfp831	2.1804	5e-05
Capn11	2.19036	5e-05
4930431P03Rik	2.19172	5e-05
Serp2	2.19344	5e-05
Zc3h12d	2.19631	5e-05
Perp	2.20328	5e-05
Rnf152	2.20812	5e-05
Slc15a1	2.21552	5e-05
Lynx1	2.21674	5e-05
Rdh5	2.21806	0.00015
Dnahc8	2.2225	5e-05
Raver2	2.22376	0.0001
Inadl	2.228	5e-05
Lypd6b	2.23245	5e-05
4930417O13Rik	2.23528	5e-05
5430402O13Rik	2.23816	0.00625
Pak1	2.24092	5e-05
Tdpoz4	2.24946	5e-05
Acvr2a	2.25661	5e-05
Upp1	2.2576	5e-05
Maged2	2.25763	5e-05
Plxdc2	2.2577	5e-05
Sh3bp5	2.26372	5e-05
Cyp4v3	2.26915	5e-05
Armcx2	2.27412	5e-05
Fam26f	2.27979	5e-05
Gpx7	2.28296	5e-05
Fndc3b	2.29661	5e-05
Clec2i	2.29779	5e-05
Pacsin1	2.29994	5e-05
Gpr162	2.30309	5e-05
Il15	2.3146	0.00795
Rxra	2.31877	5e-05
Klrb1f	2.31901	5e-05
Gm4858	2.31972	5e-05
Sec31b	2.32254	5e-05
2510009E07Rik	2.33268	5e-05
Fgfr1	2.34345	5e-05
Rgs11	2.34475	5e-05
Col20a1	2.3537	5e-05
Sh2b3	2.3557	5e-05
Ccdc141	2.36071	5e-05
A630019I02Rik	2.36393	0.0003
Spock2	2.36831	5e-05
Tgtp1	2.37704	5e-05
C030039L03Rik	2.38335	5e-05
Nmnat2	2.38491	5e-05
Tnfsf14	2.39824	5e-05
Mcf2l	2.39846	5e-05
Fsd1l	2.40123	5e-05
Smad3	2.40743	5e-05
Wbscr27	2.42224	5e-05
Rora	2.43184	5e-05
Clec2g	2.44285	5e-05
Siah3	2.44604	0.0179
Serpina3h	2.449	0.0011
Hdac11	2.46578	5e-05
A930038C07Rik	2.46661	5e-05
Bank1	2.46835	5e-05
E030011O05Rik	2.47	0.015
Fam49a	2.47617	5e-05
Dpp4	2.47651	5e-05
Tlr4	2.4766	5e-05
Ica1	2.47861	5e-05
Plxnb2	2.4792	5e-05
Ddx60	2.47949	5e-05
Gpm6b	2.48887	5e-05
Cd81	2.49426	5e-05
Gpr179	2.4958	5e-05
Brdt	2.49801	5e-05
Gm3002	2.50032	5e-05
Gm17745	2.50163	5e-05
Hmgn3	2.51246	5e-05
Glrp1	2.51316	5e-05
Rab6b	2.51774	5e-05
Gm10406	2.51833	5e-05
Nipa1	2.51852	5e-05
6330403K07Rik	2.51945	5e-05
Syt11	2.53351	5e-05
2010005H15Rik	2.54528	0.01235
Hectd2	2.55446	5e-05
Slc14a1	2.5551	5e-05
Dync2li1	2.55665	0.00085
Aebp1	2.56397	5e-05
Satb1	2.59137	5e-05
Nupr1	2.59924	5e-05
2610035D17Rik	2.60102	5e-05
Ehd3	2.62725	5e-05
Ceacam15	2.62775	5e-05
Zfp710	2.62978	5e-05
Mansc1	2.63215	5e-05
Rtkn2	2.63337	5e-05
Fam114a1	2.63379	5e-05
C1qtnf4	2.63381	0.00245
Tlr1	2.63573	5e-05
Cxcl10	2.64252	5e-05
Tmem231	2.64408	5e-05
Serpinc1	2.65089	0.00015
Slc6a9	2.65533	5e-05
Gata1	2.67344	5e-05
Sfmbt2	2.67601	5e-05
Atp8a2	2.67866	5e-05
Ryr3	2.6839	5e-05
Plaur	2.71507	0.0121
C1qb	2.71743	0.00045
AB124611	2.72718	5e-05
Gatsl3	2.73973	5e-05
C530028O21Rik	2.74032	5e-05
Klf3	2.75028	5e-05
Aig1	2.75678	5e-05
Fam46c	2.75737	5e-05
Vav2	2.7918	5e-05
Vmn2r96	2.79478	0.00245
Mylip	2.82001	5e-05
Bach2	2.8244	5e-05
Esr1	2.82715	5e-05
Gm8369	2.83643	5e-05
Rgs9	2.83957	5e-05
Tbc1d4	2.84275	5e-05
Plekha1	2.85472	5e-05
Mcoln3	2.86031	5e-05
1700020N18Rik	2.87909	0.00675
4930599N23Rik	2.88599	0.0344
Cysltr2	2.88987	5e-05
Als2cl	2.89057	5e-05
Gm12185	2.89728	5e-05
Cth	2.89913	5e-05
Cyth3	2.9096	5e-05
Pcdhgc5	2.91434	5e-05
Mtap7	2.91879	5e-05
Rab39b	2.92585	5e-05
Fggy	2.93862	5e-05
Vangl1	2.94717	5e-05
Dio2	2.95403	5e-05
P2rx4	2.96027	5e-05
Pde8a	2.96391	5e-05
Atp1b1	2.9871	0.0003
Dnm1	3.00469	5e-05
Rnf122	3.00897	5e-05
Kcnc1	3.02511	5e-05
Gm11992	3.02674	5e-05
Smtnl2	3.02963	5e-05
Ms4a6d	3.04032	5e-05
Tet1	3.04629	5e-05
Eno2	3.07709	0.00025
Smo	3.09219	5e-05
Cd70	3.10052	5e-05
Pcdhgc4	3.10354	5e-05
Tm4sf5	3.10416	0.00105
Asap1	3.11895	5e-05
Gbp2	3.13281	5e-05
Zbtb46	3.14719	0.0018
Sectm1a	3.15367	0.00105
Zfp516	3.16668	5e-05
Cntln	3.18376	5e-05
Serpina3g	3.19688	5e-05
Slc22a17	3.19998	5e-05
Sbsn	3.20086	5e-05
Rere	3.20585	5e-05
Btbd11	3.21066	5e-05
Vwa5a	3.22627	5e-05
Abcg3	3.22708	5e-05
Tsc22d1	3.23025	5e-05
Mapk11	3.23709	5e-05
Ypel4	3.24987	0.00335
Mid2	3.25029	5e-05
Parvb	3.27456	0.0002
Bmp7	3.31609	0.0075
Vegfa	3.32309	5e-05
Thsd7b	3.35067	5e-05
Plk2	3.35558	5e-05
Mmp11	3.35624	5e-05
Crtam	3.36227	5e-05
Gm9199	3.36262	5e-05
Otud1	3.36955	5e-05
Ggt7	3.38345	5e-05
Gm2897	3.3906	0.0033
Cnn3	3.39371	5e-05
Xcl1	3.405	5e-05
Dixdc1	3.40969	5e-05
Ntrk3	3.44048	5e-05
4930583H14Rik	3.44495	5e-05
Kit	3.44643	5e-05
Nebl	3.45678	5e-05
Slc4a10	3.46601	5e-05
1700042O10Rik	3.4676	0.0028
Aff3	3.48605	5e-05
Slc17a6	3.48699	0.0001
Bend5	3.52027	5e-05
Rapgef4	3.52374	5e-05
Fsd2	3.52409	5e-05
Dtx4	3.54297	5e-05
4921525O09Rik	3.55992	0.00045
Zfp467	3.58662	5e-05
Grin1	3.60527	5e-05
Cldn10	3.64012	0.00035
Irg1	3.65455	0.00235
Serpinb9b	3.70045	5e-05
Qpct	3.70648	5e-05
Cdc42ep4	3.71576	5e-05
Emr1	3.72166	0.00405
H1fx	3.72638	5e-05
Arrb1	3.73026	5e-05
Mnda	3.73129	0.00045
Itga4	3.7335	5e-05
Tox	3.75877	5e-05
Eng	3.76712	5e-05
Cecr6	3.77966	0.0001
H2-Aa	3.80428	0.0022
Mapk8ip1	3.80608	0.00035
Chi3l3	3.80785	0.00195
Myo1h	3.81325	5e-05
Scrt1	3.81696	5e-05
Dyrk4	3.83512	0.0021
Slamf6	3.86296	5e-05
Syde1	3.86654	0.0032
Ddx43	3.87509	5e-05
P4ha2	3.88732	5e-05
Ifi44	3.89963	5e-05
Ifngr2	3.90207	5e-05
Uchl1	3.9364	5e-05
Gm14085	3.93994	5e-05
Art2b	3.94309	5e-05
Chst2	3.94722	5e-05
Prkcdbp	3.96283	0.0026
C1qc	3.97797	0.0026
Igsf3	3.98132	5e-05
Slc12a8	3.99028	5e-05
Tnfsf4	4.01153	5e-05
Sorcs1	4.01844	5e-05
Spo11	4.04482	5e-05
Kif5c	4.05326	5e-05
1700101E01Rik	4.05713	0.009
Rasgef1a	4.06045	5e-05
Zfp395	4.07312	5e-05
Capn3	4.08004	5e-05
Cuedc1	4.12662	5e-05
Fas	4.13197	5e-05
Pla2g7	4.18555	0.00045
Cybb	4.18946	0.00015
Enpp5	4.1923	5e-05
Csf2	4.2144	5e-05
Trpa1	4.22004	0.00015
Gbp11	4.22543	5e-05
Ift81	4.28818	0.0018
Dscam	4.29252	5e-05
Klhl3	4.30154	0.0023
Cxcr5	4.30166	0.0026
H2-Eb1	4.32404	0.0024
Klf4	4.37653	5e-05
Tnfsf8	4.40321	5e-05
Tmie	4.40386	0.0026
Lrig1	4.43301	5e-05
Bace2	4.43687	5e-05
Slc7a3	4.44033	5e-05
Akr1b8	4.45397	0.0026
Kcna4	4.4916	5e-05
Fam124b	4.53266	0.0001
Fscn1	4.55999	0.0022
Mtap2	4.57573	5e-05
AI836003	4.59135	5e-05
Pou6f1	4.59405	5e-05
Col6a2	4.66997	0.0026
Olfr920	4.69338	0.0026
Nid1	4.69354	5e-05
Whrn	4.70105	5e-05
Ugt1a7c	4.7011	5e-05
F830016B08Rik	4.76019	5e-05
Tmod2	4.76367	5e-05
Thbs1	4.79502	5e-05
H2-Ab1	4.82754	5e-05
Samd3	4.87588	5e-05
Arrdc4	4.87832	0.0003
Espn	4.89116	5e-05
C3	4.8959	5e-05
Cd74	4.94681	5e-05
Akap2	4.97632	5e-05
Ddc	4.99648	5e-05
Gucy1b3	5.02019	0.00085
Amigo2	5.0254	0.00865
Gpr133	5.03061	0.0026
Mpeg1	5.08761	5e-05
Lyz2	5.11679	5e-05
Tlr12	5.1838	5e-05
Ccr7	5.19245	5e-05
Iigp1	5.19974	5e-05
Ms4a4c	5.20322	5e-05
Osr2	5.2145	0.0026
Clip3	5.21972	5e-05
Tnfaip2	5.2489	0.0026
Synpo	5.30256	5e-05
St6galnac3	5.31827	0.0026
Serpina3f	5.32134	5e-05
Sdc4	5.3435	5e-05
App	5.40237	5e-05
Gm4841	5.43506	5e-05
Mapk12	5.52391	0.0018
Nsg2	5.55337	5e-05
St8sia1	5.77081	5e-05
Tuba8	5.93955	0.0001
Slc2a6	5.9825	5e-05
Cd300lf	6.00136	0.02595
Twist1	6.0384	0.0026
Cd83	6.11712	0.0026
Pou2af1	6.31255	0.0019
Itga7	6.367	5e-05
Nrn1	6.45604	5e-05
Igf1r	6.45768	5e-05
Trerf1	6.51765	5e-05
Gm4951	6.6497	5e-05
Grtp1	6.77043	5e-05
P2rx7	6.79019	0.0002
Gucy1a3	6.84598	5e-05		377
Tcf7	6.85153	5e-05
Npas2	6.88057	0.0018
Oaf	6.8996	0.0026
Lif	7.06638	5e-05
Penk	7.08331	5e-05
Slc6a19	7.73914	0.0028
Lad1	8.14549	0.0026
Tgm2	8.47127	5e-05
Dapl1	8.48239	0.0026
Sell	9.36945	5e-05

## Sheet: 1vs4
	2-fold change cut-off		Total genes: 854
CuffDiff Analysis: Group 1 vs Group 4
Gene	log2(fold_change)	p_value
Gzmf	-7.98019	0.0035
Igj	-7.85164	5e-05
Nav1	-7.7618	5e-05
Ifitm1	-7.21145	5e-05
Esm1	-7.1438	5e-05
Tnfrsf8	-6.85681	5e-05
Clnk	-6.56474	5e-05
Wnt10b	-6.55203	5e-05
1810011H11Rik	-6.36399	5e-05
Cd36	-6.35545	5e-05
Il1rl1	-6.17759	5e-05
Psg17	-6.12749	5e-05
Gzma	-6.04833	5e-05
Dsc2	-5.89771	5e-05
Gldc	-5.87008	5e-05
Gpx8	-5.753	0.00265
Msrb3	-5.72987	0.0092
Fgd2	-5.65008	5e-05
Csgalnact1	-5.48602	5e-05
Pparg	-5.45491	5e-05
Mcpt8	-5.44332	5e-05
Tead1	-5.4316	0.0002
9430020K01Rik	-5.42117	5e-05
Matn2	-5.41846	0.03125
P2ry13	-5.25912	5e-05
Foxp3	-5.23366	0.00095
Gm5111	-5.23043	0.00265
Mycn	-5.21382	5e-05
Ddn	-5.20158	5e-05
Gpr15	-5.15865	5e-05
Dgkh	-5.07348	5e-05
Mical2	-5.07346	5e-05
Klra5	-5.00759	5e-05
1810006J02Rik	-4.9995	0.00265
Bahcc1	-4.95831	5e-05
Zcchc14	-4.94863	5e-05
Sult2b1	-4.94132	5e-05
B4galnt4	-4.91807	5e-05
Cd244	-4.80747	5e-05
Pkib	-4.76855	5e-05
Unc5b	-4.64307	5e-05
Sdc1	-4.61591	5e-05
Fam129b	-4.61561	5e-05
Cass4	-4.60874	5e-05
Fkbp11	-4.59838	0.00265
Rpph1	-4.57723	5e-05
Tspan9	-4.56709	5e-05
Itsn1	-4.53664	5e-05
B4galnt2	-4.52903	5e-05
Pvrl2	-4.51833	0.0005
Endou	-4.48712	5e-05
Rgs8	-4.46763	5e-05
Man1c1	-4.46473	5e-05
Gzmc	-4.46303	5e-05
Hrc	-4.46301	5e-05
Adora3	-4.44054	5e-05
Nap1l3	-4.41463	5e-05
Gm13546	-4.38586	5e-05
Ccno	-4.35754	5e-05
Gstm5	-4.30315	0.0001
Steap3	-4.30164	5e-05
Ppp1r1b	-4.30105	0.0044
Clec12a	-4.25767	5e-05
5033406O09Rik	-4.25639	0.00345
Shroom3	-4.2298	5e-05
Ifitm3	-4.22711	5e-05
Siglec5	-4.16801	0.00265
Pdcd1	-4.16683	5e-05
Pla1a	-4.16483	5e-05
Myadm	-4.14791	5e-05
Pwwp2b	-4.08982	5e-05
Lat2	-4.07337	5e-05
Alpk2	-3.99307	5e-05
Tdrkh	-3.9512	5e-05
1700026L06Rik	-3.92595	5e-05
Prkcc	-3.90202	0.0028
Fads2	-3.87999	5e-05
Plau	-3.8742	5e-05
Rai14	-3.85857	5e-05
Sulf2	-3.85676	0.0022
Pik3r6	-3.85394	5e-05
Myo16	-3.84094	5e-05
Lmna	-3.84039	5e-05
C630043F03Rik	-3.82027	0.00025
Tle1	-3.81712	5e-05
Agpat9	-3.78476	5e-05
Cbfa2t3	-3.7828	5e-05
Gm12253	-3.76601	5e-05
Plcd1	-3.73689	5e-05
Hnf1b	-3.72769	0.00025
Hist1h3e	-3.71744	0.00405
Tac4	-3.69934	0.00035
Etv4	-3.69082	5e-05
Sh3tc1	-3.68586	5e-05
Amotl1	-3.68411	5e-05
Gpr56	-3.67822	5e-05
Fam20a	-3.67269	5e-05
Oit3	-3.66451	5e-05
Havcr2	-3.66209	5e-05
Klhl30	-3.6464	5e-05
a	-3.62878	5e-05
Vrtn	-3.6239	0.00045
Adcy5	-3.59759	5e-05
Gpr141	-3.57275	5e-05
Rapsn	-3.54519	5e-05
Slc30a2	-3.52256	5e-05
Gm156	-3.51121	5e-05
AI661453	-3.50827	5e-05
S100a4	-3.49685	5e-05
Procr	-3.47865	5e-05
Itga1	-3.47798	5e-05
Serpinb1a	-3.47191	5e-05
Gzme	-3.47106	5e-05
2410022L05Rik	-3.4649	5e-05
Lrrc25	-3.46468	0.0049
Ppp2r2c	-3.46366	5e-05
Gcnt1	-3.45542	5e-05
Extl1	-3.43885	5e-05
Hgfac	-3.43509	0.0005
Prr5	-3.43101	5e-05
C1qtnf6	-3.40885	5e-05
Hist1h2bm	-3.38915	0.00035
Fcrl6	-3.38347	0.005
Ahrr	-3.38176	5e-05
Hist1h4m	-3.3761	0.0044
Hist1h2ag	-3.37244	5e-05
Tubb6	-3.33748	5e-05
Piwil4	-3.33486	5e-05
Xcr1	-3.33394	5e-05
Tmem40	-3.3339	5e-05
Csf1	-3.31461	5e-05
Maf	-3.29699	5e-05
Nfe2	-3.29675	5e-05
Nkain1	-3.27861	5e-05
Prdm1	-3.25835	5e-05
Tbc1d2	-3.24007	5e-05
Spats2	-3.20932	5e-05
Hist1h4c	-3.20647	0.0004
Dusp4	-3.20401	5e-05
Ptpn5	-3.19317	5e-05
B230120H23Rik	-3.19118	5e-05
Cmklr1	-3.17964	0.0001
Gzmd	-3.16336	5e-05
Tgm1	-3.16245	5e-05
Ak1	-3.15957	5e-05
Gcat	-3.14253	5e-05
Gzmk	-3.14228	5e-05
Epdr1	-3.1386	0.0007
Egfl7	-3.13369	5e-05
Ifitm2	-3.13276	5e-05
Scd1	-3.13046	5e-05
Vash1	-3.12514	5e-05
Gm10818	-3.12065	0.0095
Rbpms2	-3.11416	5e-05
Emid1	-3.11006	5e-05
Ifng	-3.10954	5e-05
Rapgef3	-3.07803	5e-05
Tmem163	-3.06027	5e-05
Hist1h2ak	-3.04754	0.00715
Ggt1	-3.04303	5e-05
Hist1h4f	-3.03784	0.0074
Scin	-3.0371	5e-05
Cdkn2b	-3.03424	5e-05
Npnt	-3.00898	5e-05
Pde4a	-2.9935	5e-05
Pls1	-2.98908	5e-05
2013-09-05	-2.98512	5e-05
Ltb4r1	-2.97697	5e-05
Dmwd	-2.96145	5e-05
Ccr4	-2.93643	5e-05
Cd163l1	-2.93045	5e-05
Vill	-2.92192	5e-05
Ogdhl	-2.92097	5e-05
Rassf6	-2.90838	0.0001
Dmrt2	-2.89027	5e-05
Atp6v0a1	-2.88341	5e-05
Rtn2	-2.88279	0.00035
Prss34	-2.88191	0.0002
Yap1	-2.87059	5e-05
Hist1h3c	-2.86523	5e-05
Epas1	-2.86255	5e-05
Nhsl2	-2.86224	5e-05
Hmx2	-2.85739	0.00135
Pcx	-2.85591	5e-05
Cask	-2.8547	5e-05
9030619P08Rik	-2.83539	5e-05
Hist1h2ab	-2.83387	0.0002
B230118H07Rik	-2.83185	5e-05
Cdh1	-2.82357	5e-05
Igfbp6	-2.8062	0.00015
Gpr97	-2.79856	5e-05
Gucy2e	-2.7975	5e-05
1700020L24Rik	-2.79546	5e-05
Mrgpre	-2.78633	5e-05
Gtf2ird1	-2.78522	5e-05
Nek6	-2.77812	5e-05
Tgfb3	-2.76477	5e-05
Sema7a	-2.76324	5e-05
Tom1l1	-2.75484	5e-05
Rpl26	-2.75238	5e-05
Exoc3l	-2.73883	5e-05
Cdkn2a	-2.73152	5e-05
Srl	-2.69222	5e-05
Erg	-2.68094	5e-05
Batf3	-2.67641	5e-05
2810429I04Rik	-2.6763	0.0145
BC048355	-2.67284	5e-05
Etv5	-2.66455	5e-05
Dcbld2	-2.65279	5e-05
Socs2	-2.63798	5e-05
Adamts14	-2.63512	5e-05
Kpna2	-2.63091	5e-05
Pls3	-2.6304	5e-05
Obsl1	-2.62811	5e-05
Lgmn	-2.62726	5e-05
Speer1-ps1	-2.61889	5e-05
Hist1h3h	-2.61454	0.00275
Adora2b	-2.60979	5e-05
Sh2d5	-2.60109	5e-05
Frmd4b	-2.59928	5e-05
Myo1e	-2.58781	5e-05
Hist1h3f	-2.56521	0.0022
Ly6g5b	-2.56098	5e-05
1500009L16Rik	-2.5588	5e-05
Gm6460	-2.55381	0.0001
Sh2d1b1	-2.55088	5e-05
Gpr55	-2.55055	5e-05
2900026A02Rik	-2.54678	5e-05
St3gal5	-2.53258	5e-05
Lzts1	-2.53055	5e-05
Fut4	-2.52942	5e-05
Trp73	-2.52707	5e-05
Tln2	-2.51798	5e-05
Coq7	-2.51121	5e-05
Dusp14	-2.50613	5e-05
Xylt1	-2.49822	5e-05
Itgae	-2.4866	5e-05
Trp53inp2	-2.48271	5e-05
Swap70	-2.48249	5e-05
D630045J12Rik	-2.48178	5e-05
Slc16a10	-2.46361	5e-05
Grhl1	-2.4597	5e-05
2210408F21Rik	-2.45492	5e-05
Lrp5	-2.43639	5e-05
S100a6	-2.43498	5e-05
Hist1h3g	-2.43197	0.01705
Prf1	-2.43169	5e-05
Dusp5	-2.42841	5e-05
Adap1	-2.42707	5e-05
Ntf5	-2.42369	5e-05
Ccbl2	-2.41372	5e-05
Tuba1c	-2.40247	5e-05
Hist1h1a	-2.39617	0.01745
Sdf2l1	-2.39478	5e-05
Anxa1	-2.38933	5e-05
Slc9a3r2	-2.36996	5e-05
2900011O08Rik	-2.36918	5e-05
Plekhg4	-2.36832	5e-05
D5Ertd605e	-2.3589	5e-05
Plekhf1	-2.35635	5e-05
Shmt1	-2.34879	5e-05
1700017B05Rik	-2.34733	5e-05
Wfs1	-2.34524	5e-05
Fkbp5	-2.33643	5e-05
Il2ra	-2.33176	5e-05
Entpd1	-2.32194	5e-05
Lrp8	-2.32163	5e-05
Itgb5	-2.32052	5e-05
Ccl4	-2.31785	5e-05
Gm6455	-2.31707	5e-05
Ccnb1	-2.31701	5e-05
Nkd2	-2.30995	5e-05
Hbegf	-2.30979	5e-05
Mlf1	-2.30848	5e-05
Tspan2	-2.30316	5e-05
Gnat2	-2.30093	0.00185
1700009P17Rik	-2.29599	5e-05
2810025M15Rik	-2.29394	0.00075
Ptgs1	-2.2939	5e-05
Lrp11	-2.29276	5e-05
Dab2ip	-2.28322	5e-05
Fcer1g	-2.2794	5e-05
Megf9	-2.27807	5e-05
Kctd14	-2.268	5e-05
Snx9	-2.26138	5e-05
Prss16	-2.26004	5e-05
Card10	-2.25108	5e-05
Serf1	-2.23739	5e-05
Pam	-2.23505	5e-05
Faim3	-2.22409	5e-05
Ppap2a	-2.21977	5e-05
Fanca	-2.21594	5e-05
Bco2	-2.20689	5e-05
2610002D18Rik	-2.19982	5e-05
Litaf	-2.19925	5e-05
Hist1h4a	-2.19786	0.0194
Aurka	-2.18933	5e-05
Ttc16	-2.1891	0.00165
Gpd2	-2.18872	5e-05
Cpd	-2.18572	5e-05
Emp1	-2.18168	5e-05
Ccl5	-2.18028	5e-05
Asf1b	-2.17654	5e-05
Cacng8	-2.17294	5e-05
Trip13	-2.17158	5e-05
Pycr1	-2.16818	5e-05
Mfsd2a	-2.16642	5e-05
Recql4	-2.16532	5e-05
St3gal2	-2.15318	5e-05
Lpin3	-2.15045	5e-05
Uchl4	-2.14849	5e-05
BC035044	-2.14476	5e-05
Tuba4a	-2.14329	5e-05
Hist1h3a	-2.13227	0.0001
Orc1	-2.13026	5e-05
Arap3	-2.1286	5e-05
Cyb561	-2.12001	5e-05
Osgin1	-2.1167	5e-05
Ppfia3	-2.10229	5e-05
Snx8	-2.09898	5e-05
Chit1	-2.0987	0.00055
Sv2c	-2.094	5e-05
5830418P13Rik	-2.08699	5e-05
Ctnnd2	-2.07968	5e-05
Prnp	-2.07506	5e-05
Dennd3	-2.07268	5e-05
Rnd2	-2.07067	0.00055
Hist1h2ae	-2.07011	5e-05
Dusp9	-2.07	5e-05
Abcb9	-2.06798	5e-05
Lims2	-2.0671	0.0001
Tsga10	-2.06685	5e-05
Evpl	-2.06629	5e-05
Fxyd4	-2.06577	0.0136
Gcnt2	-2.06512	5e-05
Nrarp	-2.06328	5e-05
Ccl3	-2.06196	5e-05
Tnk2	-2.05491	5e-05
Mcm10	-2.05305	5e-05
Ccne1	-2.05255	5e-05
D10Bwg1379e	-2.05156	5e-05
Rrm2	-2.0508	5e-05
Fdps	-2.04936	5e-05
Napsa	-2.04788	5e-05
Tmem48	-2.03824	5e-05
Bambi	-2.03623	5e-05
Myh10	-2.03301	5e-05
Gm8773	-2.0301	5e-05
Nup93	-2.02876	5e-05
Gatm	-2.01902	5e-05
Spink2	-2.01497	0.0026
Pif1	-2.01239	5e-05
Fam54a	-2.00534	5e-05
Egr1	-2.00453	5e-05
Dyrk3	-2.00199	5e-05
Dlg2	2.00167	5e-05
Tbx6	2.00453	5e-05
Abhd14b	2.0062	5e-05
Ndrg1	2.00695	5e-05
Sh3yl1	2.00696	5e-05
2410066E13Rik	2.00828	5e-05
Ret	2.00842	5e-05
Arhgap31	2.00949	5e-05
Padi1	2.0102	0.00025
Acer2	2.01289	5e-05
Kdm4d	2.02069	5e-05
Pcdhgc5	2.02145	5e-05
Amt	2.02607	5e-05
Bcl2	2.02615	5e-05
H2-Q2	2.03211	5e-05
Camk2b	2.03219	5e-05
A930024E05Rik	2.03228	5e-05
Nfkbiz	2.03292	5e-05
Fbxo32	2.03513	5e-05
Npff	2.03737	5e-05
4933412E12Rik	2.03971	5e-05
1110051M20Rik	2.04103	5e-05
Ms4a4d	2.04283	5e-05
2810474O19Rik	2.04631	5e-05
Sema4g	2.04862	5e-05
H2-Q4	2.05093	5e-05
Fyb	2.05625	5e-05
Sntb1	2.05847	5e-05
Il11ra1	2.05849	5e-05
Lilrb4	2.06137	5e-05
Tmod4	2.06269	0.0001
H2-Q7	2.06611	5e-05
Plxdc2	2.068	5e-05
Nrn1l	2.06871	0.035
Siah3	2.06942	0.03295
Zfp874b	2.07023	5e-05
Hsd17b11	2.07343	5e-05
Cnr2	2.08154	5e-05
2310015A10Rik	2.08374	5e-05
Psd	2.08676	5e-05
Acp5	2.08741	5e-05
Dlg3	2.09094	5e-05
1110046J04Rik	2.09151	5e-05
Mapre3	2.09266	5e-05
Slc4a7	2.09267	5e-05
4833422C13Rik	2.097	5e-05
Selenbp1	2.09877	5e-05
Etv6	2.10412	5e-05
Atp10d	2.11033	5e-05
Enc1	2.11386	5e-05
Nbeal1	2.11413	5e-05
Setbp1	2.1176	5e-05
Ift80	2.11873	5e-05
Fam65b	2.12668	5e-05
Ltb	2.12818	5e-05
Hk3	2.13154	5e-05
Trim2	2.13548	5e-05
Gbp5	2.13699	5e-05
H2-T3	2.14284	5e-05
Smarcd3	2.14438	5e-05
Tlr6	2.1446	5e-05
Rgag4	2.15127	5e-05
Tnfaip3	2.15561	5e-05
Dzip1	2.15653	5e-05
Cd84	2.15812	5e-05
Clec2i	2.1602	5e-05
Abcg2	2.16115	5e-05
Disc1	2.16314	5e-05
Igf2bp2	2.16572	5e-05
Vpreb3	2.16993	0.0024
Ypel2	2.17164	5e-05
Fam109a	2.17263	5e-05
Sh3d19	2.17387	5e-05
Celf5	2.17491	5e-05
Mast4	2.17545	5e-05
H2-Oa	2.18291	5e-05
Tnfrsf23	2.18795	5e-05
Ctss	2.19178	5e-05
Zfp931	2.20003	5e-05
Zbtb4	2.20137	5e-05
Baz2b	2.20183	5e-05
Tnfrsf14	2.20975	5e-05
Gp1ba	2.21049	5e-05
Txnip	2.21239	5e-05
Upp1	2.22031	5e-05
Ikzf2	2.22181	5e-05
Lama5	2.23554	5e-05
Utrn	2.24011	5e-05
Dst	2.24379	5e-05
Nod1	2.24706	5e-05
Perp	2.24707	5e-05
Armc3	2.24715	5e-05
Fam53b	2.24729	5e-05
Dnahc8	2.24764	5e-05
Palm3	2.24878	5e-05
Cntln	2.2492	5e-05
Rgs9	2.25	5e-05
Zfp354c	2.25348	5e-05
Hectd2	2.25368	5e-05
Rxra	2.26003	5e-05
Rora	2.26434	5e-05
Egr3	2.26447	5e-05
Hyi	2.26892	5e-05
Cyp2s1	2.2697	5e-05
Ak4	2.27139	5e-05
Tubb4a	2.27313	5e-05
Nlgn3	2.27843	5e-05
Fam132a	2.2901	5e-05
5031434O11Rik	2.29056	5e-05
A630019I02Rik	2.29058	0.0004
Jun	2.29453	5e-05
Tmem71	2.29506	5e-05
Ndrg2	2.31335	5e-05
Smad3	2.31962	5e-05
Cul9	2.32367	5e-05
Arntl	2.32539	5e-05
Nod2	2.32675	5e-05
2510009E07Rik	2.32935	5e-05
Gm6034	2.33769	0.0001
Card9	2.33913	0.00455
Naip5	2.33916	5e-05
Lysmd2	2.34099	5e-05
Raver2	2.34279	5e-05
Fam26f	2.34743	5e-05
Sag	2.35206	0.0001
Casz1	2.35505	5e-05
Sh2b3	2.35565	5e-05
Lynx1	2.36364	5e-05
Zfr2	2.36537	5e-05
Wnk4	2.36969	5e-05
Nfkbia	2.37442	5e-05
As3mt	2.38189	5e-05
Xcl1	2.38256	5e-05
Serinc5	2.38551	5e-05
Aebp1	2.38584	5e-05
Smpdl3a	2.38601	5e-05
Ccdc141	2.38781	5e-05
Gm17455	2.38997	0.0016
A430035B10Rik	2.39207	5e-05
Slfn1	2.39394	5e-05
6330403K07Rik	2.40231	5e-05
Apol7e	2.40611	5e-05
Ptger2	2.40624	5e-05
Il6st	2.40847	5e-05
H2-DMa	2.40955	5e-05
Tnfsf14	2.41253	5e-05
Bcl6	2.41316	5e-05
2010016I18Rik	2.41429	5e-05
Vmn2r97	2.41817	5e-05
Serp2	2.41886	5e-05
Carns1	2.42346	5e-05
Gramd3	2.42501	5e-05
Tnfrsf26	2.4283	5e-05
Sfmbt2	2.43101	5e-05
4933403G14Rik	2.43587	5e-05
Art4	2.44135	5e-05
Gm5544	2.44221	0.00105
4831440E17Rik	2.44446	5e-05
4930481A15Rik	2.44877	5e-05
Mcf2l	2.45129	5e-05
Kcnd1	2.46107	0.00025
A930038C07Rik	2.46535	5e-05
Gm11696	2.46593	5e-05
Irf6	2.46993	5e-05
Tmem22	2.47044	5e-05
Clec2g	2.47216	5e-05
Cxx1c	2.47825	5e-05
Gbe1	2.48112	5e-05
Insrr	2.48302	5e-05
Pgap1	2.48397	5e-05
Ncoa7	2.49139	5e-05
Glrp1	2.4945	5e-05
Rnf152	2.4965	5e-05
Bambi-ps1	2.5023	5e-05
Ctxn1	2.50769	5e-05
5430402O13Rik	2.51534	0.00335
Art2a-ps	2.51849	5e-05
Fndc3b	2.52348	5e-05
Pik3ip1	2.52514	5e-05
4833442J19Rik	2.52564	5e-05
Tmem231	2.52855	5e-05
Dnajc27	2.52873	5e-05
Col20a1	2.53331	5e-05
Dlg4	2.53812	5e-05
Crebl2	2.53887	5e-05
E130215H24Rik	2.54151	5e-05
Gab3	2.54171	5e-05
Gpr157	2.55058	5e-05
Klrb1f	2.552	5e-05
A230072E10Rik	2.55242	5e-05
B930059L03Rik	2.55308	0.00085
Sema6c	2.55815	5e-05
Tm4sf5	2.55856	0.00305
Cd81	2.55908	5e-05
Zc3h12d	2.59369	5e-05
Tpd52	2.59564	5e-05
Gpm6b	2.5968	5e-05
Gpr179	2.60498	5e-05
Fam49a	2.6155	5e-05
Gm10406	2.62722	5e-05
C130026I21Rik	2.63667	5e-05
Zfp773	2.63685	5e-05
Usp35	2.64413	5e-05
1700020N18Rik	2.64578	0.00975
Ntrk3	2.64621	5e-05
Stc2	2.64657	5e-05
Acvr2a	2.64889	5e-05
2410006H16Rik	2.65254	5e-05
Ctse	2.67044	5e-05
Scml4	2.68654	5e-05
Mansc1	2.69061	5e-05
Fsd1l	2.69065	5e-05
Plk2	2.70367	5e-05
Actn1	2.70506	5e-05
Aig1	2.70968	5e-05
Armcx1	2.70991	5e-05
C1qb	2.71226	0.00045
Elovl7	2.71338	5e-05
Rdh5	2.71915	5e-05
Zhx2	2.71937	5e-05
Tgfb1i1	2.72201	5e-05
Pak1	2.72871	5e-05
A330023F24Rik	2.73569	5e-05
Zfp831	2.73787	5e-05
Dpp4	2.7385	5e-05
Gm3002	2.73947	5e-05
A930015D03Rik	2.74097	5e-05
Dio2	2.74583	5e-05
Sepp1	2.74606	5e-05
Phlpp1	2.74803	5e-05
Cyp4v3	2.74919	5e-05
Tdgf1	2.76366	0.00215
C030039L03Rik	2.76687	5e-05
Zbtb46	2.76928	0.00335
Id3	2.77874	5e-05
Gm14446	2.78296	5e-05
Gbp10	2.78629	5e-05
Zfp710	2.78803	5e-05
Fam114a1	2.79032	5e-05
Aldh1l1	2.79081	0.0001
Gm17745	2.79088	5e-05
Il6ra	2.79092	0.00025
Pde2a	2.7964	5e-05
Nebl	2.79653	5e-05
Lypd6b	2.81182	5e-05
Ecm1	2.81429	5e-05
Capn11	2.81579	5e-05
Fxyd7	2.81687	5e-05
Mmp11	2.8207	5e-05
Serpina3h	2.82136	0.0004
Gata1	2.82342	5e-05
Plcxd1	2.82758	5e-05
Tgtp1	2.83603	5e-05
Sh3bp5	2.83872	5e-05
Spock2	2.83891	5e-05
Mboat2	2.84577	5e-05
Cysltr2	2.8514	5e-05
Arl5c	2.85452	5e-05
Vav2	2.85765	5e-05
Pde8a	2.85771	5e-05
Rab39b	2.86216	5e-05
Syt11	2.87141	5e-05
Inadl	2.87421	5e-05
Armcx2	2.87636	5e-05
Slc14a1	2.87855	5e-05
Pacsin1	2.88675	5e-05
Dbp	2.88747	5e-05
Brdt	2.891	5e-05
H1fx	2.89765	5e-05
Tlr4	2.90379	5e-05
Gm10863	2.90621	0.0044
Ddx60	2.93336	5e-05
Gatsl3	2.94932	5e-05
Uchl1	2.96383	5e-05
Mid2	2.97001	5e-05
4930431P03Rik	2.97171	5e-05
Mapk11	2.97907	5e-05
Satb1	2.9921	5e-05
Smo	2.99815	5e-05
Wbscr27	3.00328	5e-05
Dync2li1	3.00351	0.0002
Ehd3	3.00392	5e-05
Slc15a2	3.00846	5e-05
Kdm5b	3.01888	5e-05
Gm11992	3.02758	5e-05
Plekha1	3.06183	5e-05
Gm16157	3.0738	5e-05
Nipa1	3.09242	5e-05
Il15	3.09768	0.00195
Slc7a3	3.10801	5e-05
Serpina3g	3.11333	5e-05
1700101E01Rik	3.13078	0.0139
Cyth3	3.13253	5e-05
P2rx4	3.13566	5e-05
Dixdc1	3.14148	5e-05
Mef2b	3.17884	0.0126
4933440M02Rik	3.18954	0.0003
Fam46c	3.19917	5e-05
Tox	3.20042	5e-05
Bank1	3.21088	5e-05
2610035D17Rik	3.21217	5e-05
Mtap7	3.21335	5e-05
Fggy	3.22347	5e-05
Als2cl	3.22572	5e-05
1700042O10Rik	3.22697	0.00365
2200002K05Rik	3.23526	0.0029
AB124611	3.24083	5e-05
Nckap5l	3.25245	5e-05
Gm9199	3.26354	5e-05
Rab6b	3.26951	5e-05
E130102H24Rik	3.27083	5e-05
Vmn2r96	3.29165	0.00075
Esr1	3.30662	5e-05
Atp8a2	3.32136	5e-05
Fam131a	3.326	0.0244
4930417O13Rik	3.33299	5e-05
Hdac11	3.34337	5e-05
Vwa5a	3.34763	5e-05
H2-Aa	3.34961	0.003
Gbp2	3.35758	5e-05
C530028O21Rik	3.35991	5e-05
Abcg3	3.36361	5e-05
C1qtnf4	3.36458	0.00065
BC051537	3.36994	0.0007
Sec31b	3.37455	5e-05
Gm12185	3.37615	5e-05
Akr1b8	3.37959	0.00495
Gm8369	3.38653	5e-05
Fgfr1	3.38819	5e-05
Crtam	3.38957	5e-05
Ddx43	3.40138	5e-05
Ephx1	3.4084	5e-05
Mcoln3	3.41277	5e-05
Bach2	3.41307	5e-05
Tbc1d4	3.41366	5e-05
Tlr1	3.42931	5e-05
Rgs11	3.43724	5e-05
Cnn3	3.44103	5e-05
Pla2g7	3.44543	0.00115
Tet1	3.45579	5e-05
4930599N23Rik	3.46187	0.02365
Ggt7	3.50222	5e-05
Thsd7b	3.50262	5e-05
Tsc22d1	3.5117	5e-05
Ms4a6d	3.52682	5e-05
Asap1	3.53084	5e-05
Fbxw10	3.54093	0.00415
Mnda	3.543	0.0006
Mylip	3.55417	5e-05
Dntt	3.56076	0.0144
Smtnl2	3.56837	5e-05
Atp1b1	3.58092	5e-05
Tnfsf4	3.5948	5e-05
Chst2	3.59783	5e-05
Igsf3	3.6158	5e-05
Csf2	3.62253	5e-05
Rere	3.62646	5e-05
A930007I19Rik	3.63676	0.0032
Ctsf	3.64028	5e-05
Otud1	3.65715	5e-05
AI836003	3.66115	5e-05
Sorcs1	3.66144	5e-05
Iglon5	3.66209	0.0047
Aff3	3.66603	5e-05
Rnf122	3.66877	5e-05
Ryr3	3.6731	5e-05
Serpinb9b	3.67521	5e-05
Nmnat2	3.68725	5e-05
Kit	3.70175	5e-05
Btbd11	3.71729	5e-05
Qpct	3.78509	5e-05
Bmp7	3.78676	0.00405
Sbsn	3.78705	5e-05
Nid1	3.78947	5e-05
Ceacam15	3.79716	5e-05
C1qc	3.80021	0.00265
4921525O09Rik	3.81134	0.0002
Ypel4	3.81972	0.002
Zfp467	3.82871	5e-05
Grin1	3.83156	5e-05
Plaur	3.83571	0.0029
Fscn1	3.84287	0.0023
BC024582	3.8496	0.04015
P4ha2	3.85014	5e-05
Scrt1	3.88372	5e-05
Cybb	3.8891	0.0003
Fam124b	3.92349	0.00025
Dscam	3.92938	5e-05
Eng	3.93634	5e-05
Cuedc1	3.96557	5e-05
Mapk8ip1	3.97149	0.0003
Slc22a17	3.97548	5e-05
Slc12a8	3.99341	5e-05
Syde1	4.01172	0.00275
Bend5	4.08633	5e-05
Ifngr2	4.09782	5e-05
Eno2	4.1182	5e-05
Kcna4	4.15587	5e-05
Dnm1	4.17229	5e-05
Fsd2	4.17389	5e-05
Cd74	4.17517	5e-05
Arrb1	4.20321	5e-05
Ugt1a7c	4.20766	5e-05
Kcnc1	4.2508	5e-05
Zfp516	4.25935	5e-05
Slc4a10	4.26623	5e-05
4930583H14Rik	4.28039	5e-05
Capn3	4.29688	5e-05
Itga4	4.29784	5e-05
C3	4.31245	5e-05
Vipr1	4.33804	5e-05
Zfp395	4.35892	5e-05
Enpp5	4.35935	5e-05
Lrig1	4.36066	5e-05
Rapgef4	4.37462	5e-05
Myo1h	4.3842	5e-05
Vegfa	4.40979	5e-05
Fas	4.43466	5e-05
Dtx4	4.44692	5e-05
Art2b	4.45421	5e-05
Ift81	4.4791	0.0018
Bace2	4.517	5e-05
Kif5c	4.52088	5e-05
Klhl3	4.58106	0.0023
Mapk12	4.58162	0.0018
Slamf6	4.58258	5e-05
Klf3	4.58363	5e-05
Ifi44	4.6162	5e-05
H2-Eb1	4.62907	0.0024
Parvb	4.65305	5e-05
Cldn10	4.71756	0.00015
F830016B08Rik	4.73818	5e-05
Lyz2	4.74802	5e-05
Tmod2	4.75453	5e-05
Cecr6	4.81797	5e-05
Spo11	4.85459	5e-05
Tnfsf8	4.88097	5e-05
Tmie	4.88323	0.0026
Tuba8	4.89449	0.0001
Olfr920	4.90534	0.0026
Klf4	4.91134	5e-05
Gbp11	4.91733	5e-05
Rasgef1a	4.95267	5e-05
Whrn	4.9718	5e-05
Cxcr5	4.97873	0.0026
Osr2	4.995	0.0026
H2-Ab1	5.00137	5e-05
Dyrk4	5.13425	0.002
Akap2	5.17397	5e-05
Samd3	5.20172	5e-05
Ddc	5.21515	5e-05
Serpina3f	5.28093	5e-05
Mpeg1	5.33456	5e-05
Pou6f1	5.33987	5e-05
Espn	5.3636	5e-05
Synpo	5.3865	5e-05
Cd300lf	5.46263	0.02595
Ms4a4c	5.46311	5e-05
Clip3	5.46989	5e-05
Iigp1	5.49229	5e-05
App	5.49326	5e-05
Twist1	5.50422	0.0026
Slc2a6	5.50621	5e-05
Abi3bp	5.53605	5e-05
Oaf	5.57744	0.0026
Gpr133	5.64651	0.0026
Arrdc4	5.67404	0.0001
Penk	5.69908	5e-05
Cacna2d4	5.71856	0.002
Gm4841	5.72695	5e-05
St6galnac3	5.74878	0.0026
Thbs1	5.77072	5e-05
Tlr12	5.77673	5e-05
Cd83	5.79775	0.0026
Gprc5b	5.87644	0.0117
Amigo2	5.88794	0.00865
Gucy1b3	5.91169	0.00085
St8sia1	5.98813	5e-05
P2rx7	5.99635	0.0002
Ccr7	6.04091	5e-05
Gm14085	6.21131	5e-05
Sdc4	6.29416	5e-05
Trerf1	6.33971	5e-05
Pou2af1	6.58951	0.0019
Lif	6.62082	5e-05
Npas2	6.68206	0.0018
Nrn1	6.69398	5e-05
Grtp1	6.70455	5e-05
Nsg2	6.85916	5e-05
Gm4951	6.86803	5e-05
Igf1r	7.00682	5e-05
Lad1	7.0785	0.0026
Gucy1a3	7.38704	5e-05
Tcf7	7.44409	5e-05
Itga7	7.68402	5e-05
Tgm2	7.92982	5e-05
Dapl1	8.68049	0.0026
Slc6a19	9.19364	0.0028
Sell	10.4295	5e-05

## Sheet: 2vs3
	2-fold change cut-off		Total genes: 4
CuffDiff Analysis: Group 2 vs Group 3
Gene	log2(fold_change)	p_value
Gm156	-2.50974	5e-05
Gstm5	-2.46479	0.00665
Gpr15	-2.04893	5e-05
Sell	6.08147	5e-05

## Sheet: 2vs4
	2-fold change cut-off		Total genes: 44
CuffDiff Analysis: Group 2 vs Group 4
Gene	log2(fold_change)	p_value
4933405E24Rik	-3.59013	0.00365
Clec12a	-3.18819	5e-05
Clnk	-3.14825	0.0001
Cth	-3.03192	5e-05
1810011H11Rik	-2.64272	5e-05
Adora3	-2.51793	5e-05
Shroom3	-2.46287	5e-05
Col6a2	-2.45956	5e-05
Pparg	-2.43992	5e-05
S100a9	-2.404	0.00235
Tnfrsf8	-2.32331	5e-05
St6galnac2	-2.32019	5e-05
Hist1h3e	-2.30254	0.0204
Ak1	-2.29896	5e-05
Erg	-2.29451	0.0003
Scin	-2.25114	5e-05
Gm156	-2.22337	5e-05
Gstm5	-2.18102	0.00565
Plau	-2.17489	0.00045
Klra5	-2.16989	5e-05
Cass4	-2.1212	5e-05
Clec10a	-2.10757	0.0021
B4galnt4	-2.0951	5e-05
Hrc	-2.09021	0.0001
Batf3	-2.08979	5e-05
Pwwp2b	-2.05752	5e-05
Hist1h4f	-2.0133	0.0282
St6gal1	2.04908	5e-05
Dntt	2.05251	0.0002
Syt6	2.22354	5e-05
Cacna2d4	2.3428	5e-05
Hdac9	2.42942	5e-05
Gm14085	2.44331	5e-05
Tuba3a	2.46897	5e-05
H2-Ob	2.49171	5e-05
Pde2a	2.57902	5e-05
Prss12	2.60668	5e-05
Rpl39l	2.7246	0.00025
Gprc5b	2.91876	5e-05
Il6ra	3.09499	0.0001
Trpm1	3.12968	0.00025
Prg2	3.20462	0.00435
Vipr1	3.61092	5e-05
Sell	7.14152	5e-05

## Sheet: 3vs4
	2-fold change cut-off		Total genes: 29
CuffDiff Analysis: Group 3 vs Group 4
Gene	log2(fold_change)	p_value
4933405E24Rik	-3.15623	0.00705
Cth	-2.72515	5e-05
S100a9	-2.36471	0.00235
Vangl1	-2.30954	5e-05
Tnfrsf8	-2.17671	5e-05
Iqgap3	-2.15159	5e-05
Gas2l3	-2.13663	5e-05
Ak1	-2.13409	0.0001
Fam83d	-2.09164	5e-05
Aurka	-2.07677	5e-05
Hist1h4f	-2.07509	0.02695
Kpna2	-2.06407	5e-05
Fads2	-2.05658	5e-05
Plk1	-2.04242	5e-05
Ccnb1	-2.02977	5e-05
Hist1h2ag	-2.01227	5e-05
Prss12	2.06878	5e-05
D930028M14Rik	2.1171	0.0001
Rnf32	2.14574	5e-05
Rpl39l	2.233	0.002
Tuba3a	2.25645	5e-05
Acvrl1	2.26312	5e-05
Gm14085	2.27137	5e-05
Vipr1	2.35955	5e-05
Fcgrt	2.53717	5e-05
Hdac9	2.58792	5e-05
4933440M02Rik	2.85839	5e-05
Il6ra	2.91091	0.0003
Syt6	3.35264	5e-05
